# Supplementary material for: Long-range DNA end resection supports homologous recombination by checkpoint activation rather than extensive homology generation
Source: eLife journal article supplement (doi:10.7554/elife.84322), 2023-06-30
Supplement: supp [file elife-84322-supp-v1.zip]

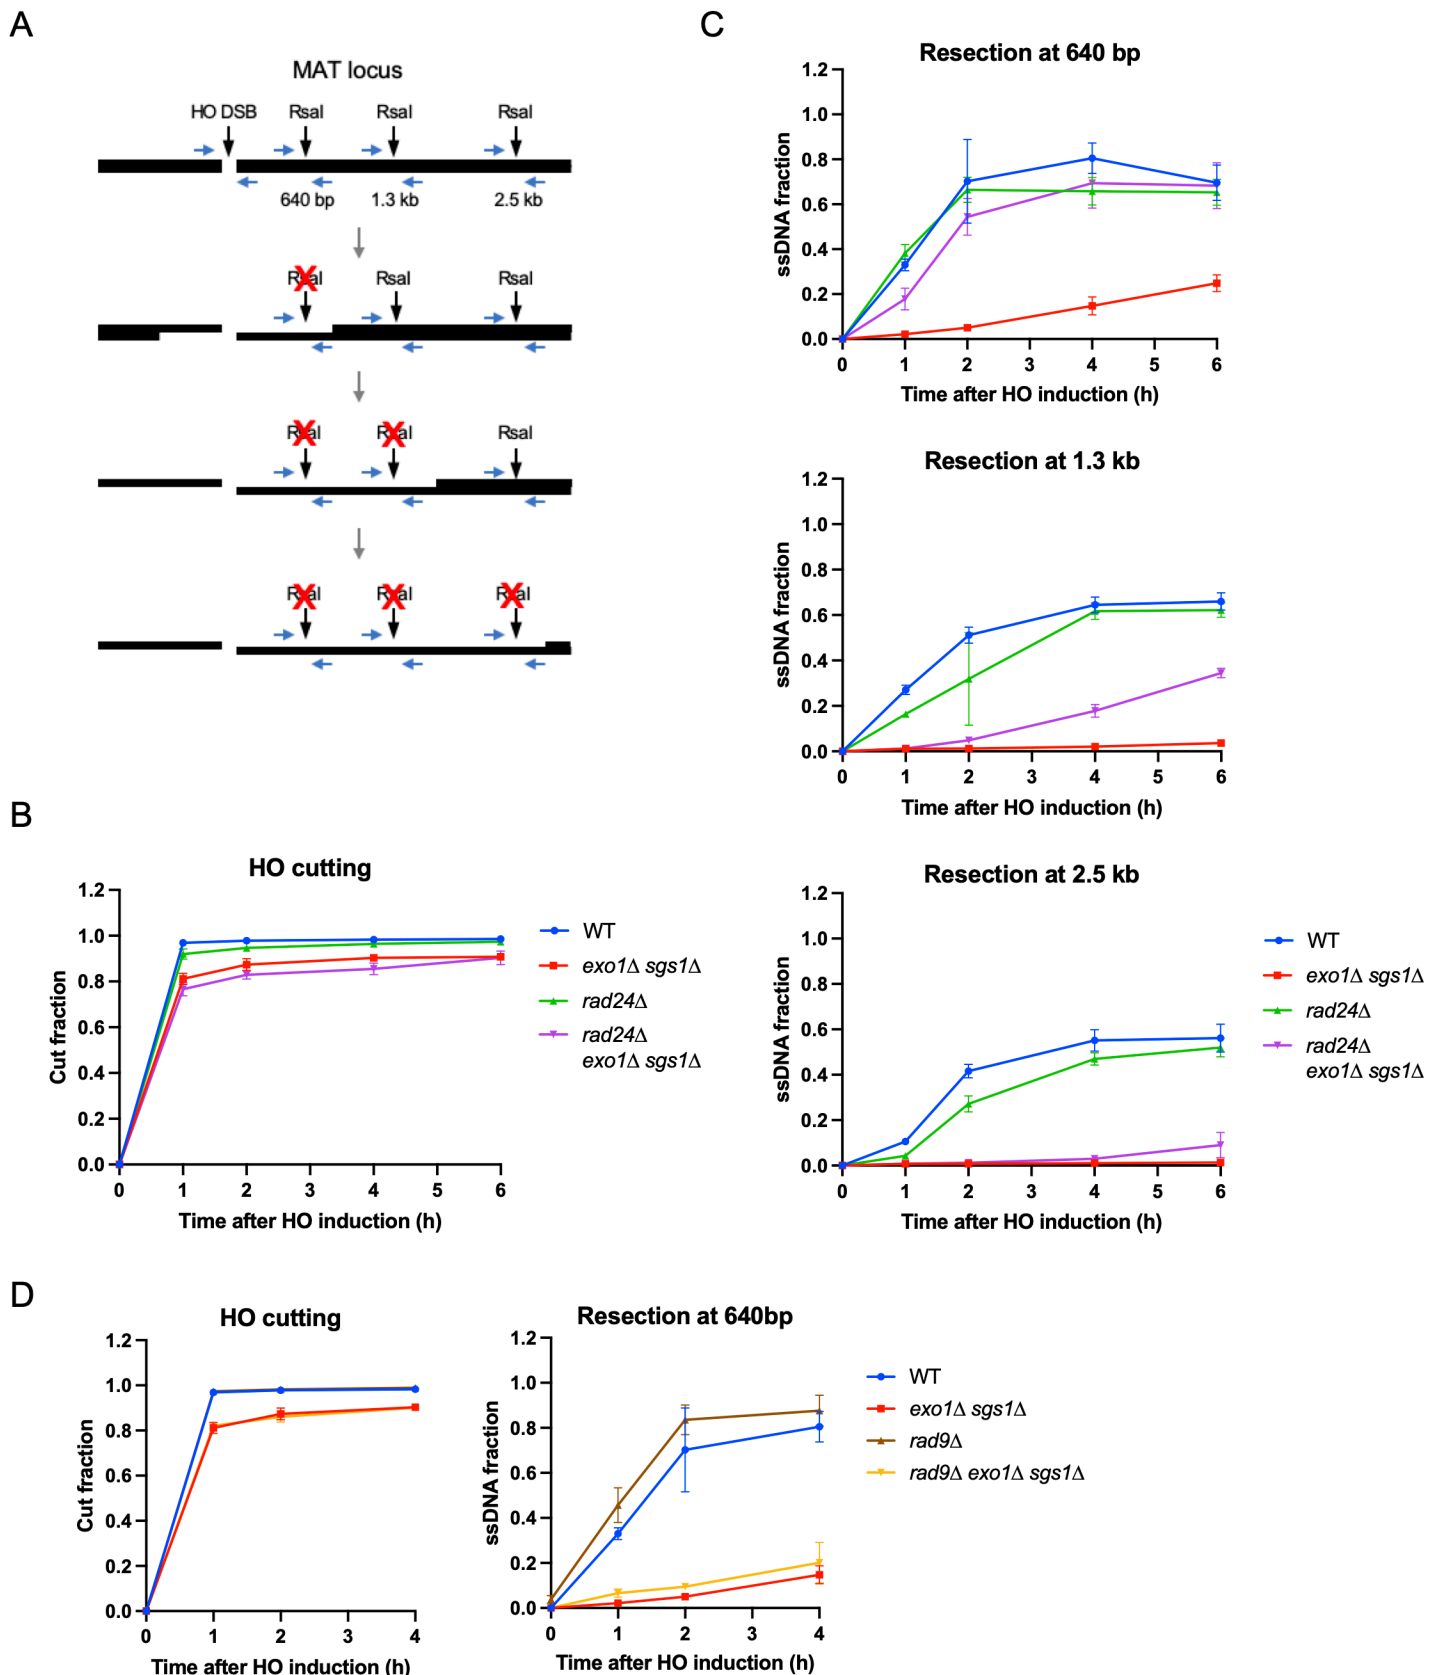

**Figure 3 – figure supplement 1.** Loss of *RAD24*, but not *RAD9* suppresses the resection defect of *exo1Δ sgs1Δ* cells. **(A)** Schematic of the qPCR-based resection assay. The HO cut site, along with three *RsaI* cut sites used to measure resection are indicated. Oligos are represented as horizontal blue arrows. Resection past an *RsaI* site leads to its inactivation. **(B)** HO cutting efficiency as measured by qPCR with primers flanking the HO cut site as shown in (A). **(C)** Measurement of ssDNA at 640 bp, 1.3 kb and 2.5 kb from the HO DSB using the qPCR-based resection assay. **(D)** HO cutting efficiency and measurement of ssDNA at 640 bp from the HO DSB as described for B and C. For B-D, each point represents the mean of 3 biological replicates and error bars represent standard deviation.
