# Supplementary material for: Long-range DNA end resection supports homologous recombination by checkpoint activation rather than extensive homology generation
Source: eLife journal article supplement (doi:10.7554/elife.84322), 2023-06-30
Supplement: supp [file elife-84322-supp-v1.zip]

### Interchromosomal Recombination

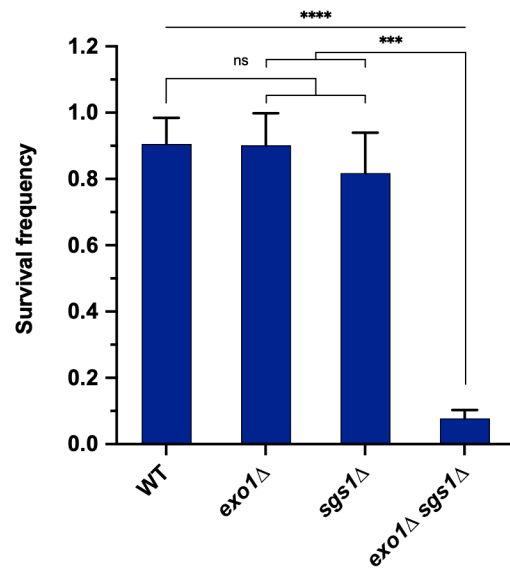

**Figure 1 – figure supplement 3.** Survival frequency in the plating assay for the interchromosomal strains. Mean values from at least 3 plating assays per genotype are shown and error bars represent standard deviation. \*\*\*  $p < .001$ , \*\*\*\*  $p < .0001$ .
