# Supplementary material for: Long-range DNA end resection supports homologous recombination by checkpoint activation rather than extensive homology generation
Source: eLife journal article supplement (doi:10.7554/elife.84322), 2023-06-30
Supplement: supp [file elife-84322-supp-v1.zip]

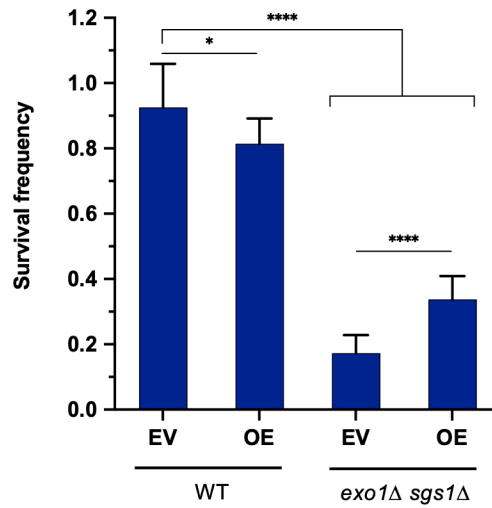

**Figure 5 – figure supplement 2.** Rad51 over-expression partially rescues the interchromosomal recombination defect of long-range resection deficient cells. Survival frequency in the plating assay for the interchromosomal strains with the indicated genotypes, plus empty vector (EV) or Rad51 over-expression plasmid (OE). Bars represent mean values from at least 8 plating assays per strain. Error bars represent standard deviation. \*  $p < .05$ , \*\*\*\*  $p < .0001$ .
