# Supplementary material for: Long-range DNA end resection supports homologous recombination by checkpoint activation rather than extensive homology generation
Source: eLife journal article supplement (doi:10.7554/elife.84322), 2023-06-30
Supplement: supp [file elife-84322-supp-v1.zip]

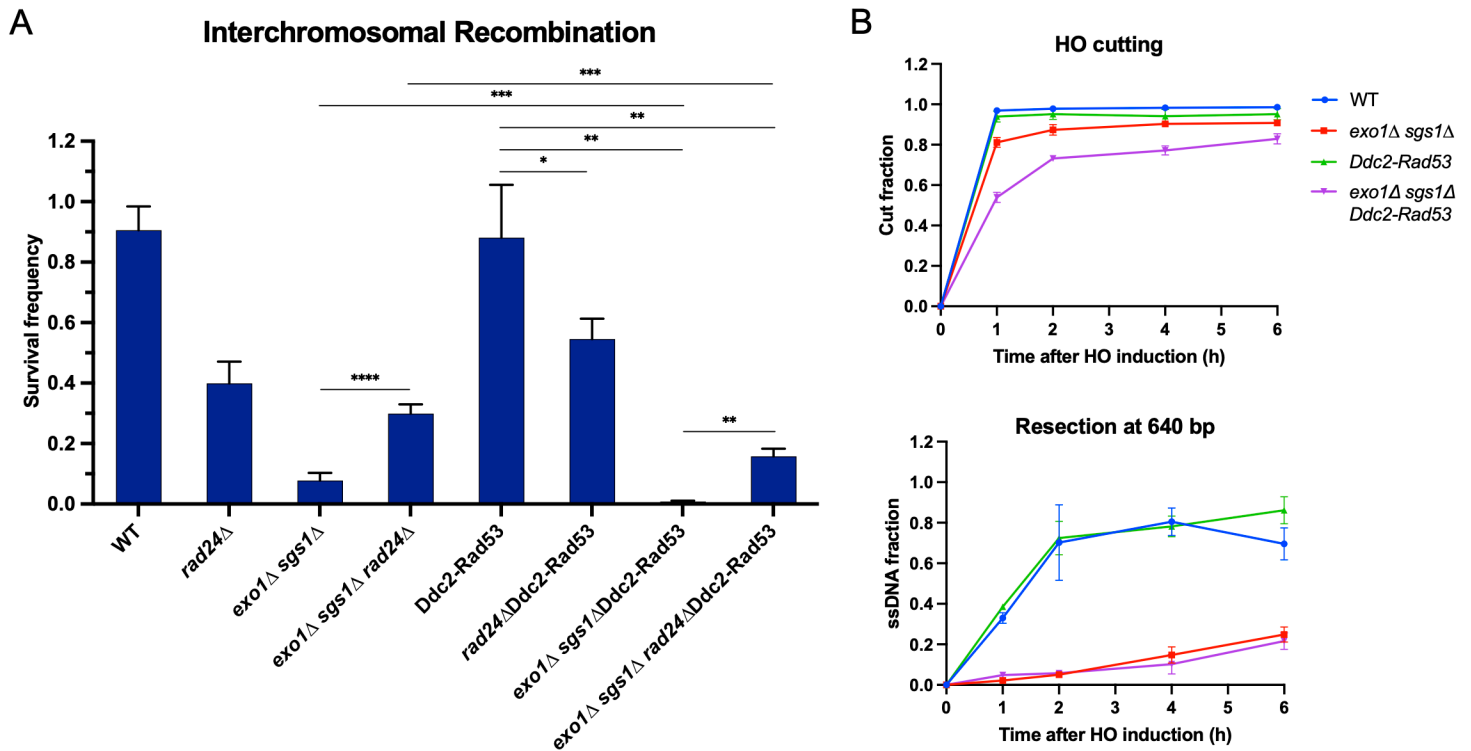

**Figure 4 – figure supplement 1.** Checkpoint restoration in *exo1*Δ *sgs1*Δ interchromosomal assay strains. **(A)** Survival frequency in the plating assay for the interchromosomal strains with the indicated genotypes. Bars represent mean values from at least 2 plating assays per strain. Error bars represent standard deviation. \*  $p < .05$ , \*\*  $p < .01$ , \*\*\*  $p < .001$ , \*\*\*\*  $p < .0001$  **(B)** HO cutting efficiency as measured by qPCR with primers flanking the HO cut site (top) and measurement of ssDNA at 640 bp from the HO DSB using the qPCR-based resection assay (bottom) as in Figure 3 – figure supplement 1. Each point represents the mean of 4 biological replicates and error bars represent standard deviation.
