# Supplementary material for: Long-range DNA end resection supports homologous recombination by checkpoint activation rather than extensive homology generation
Source: eLife journal article supplement (doi:10.7554/elife.84322), 2023-06-30
Supplement: supp [file elife-84322-supp-v1.zip]

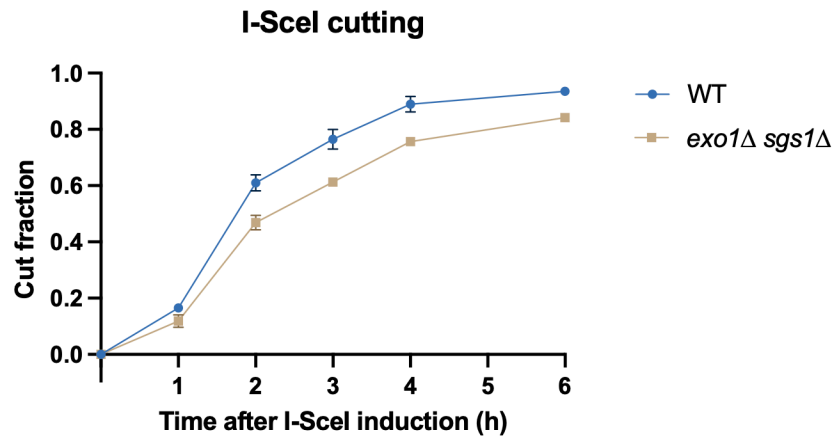

**Figure 2 - figure supplement 1.** I-SceI cutting kinetics. I-SceI cutting efficiency in WT and *exo1Δ sgs1Δ* cells as measured by qPCR with primers flanking the cut site in strains with the *ade2-I* allele only. Points represent the mean of 2 biological replicates and error bars represent standard deviation.
