# Supplementary material for: Long-range DNA end resection supports homologous recombination by checkpoint activation rather than extensive homology generation
Source: eLife journal article supplement (doi:10.7554/elife.84322), 2023-06-30
Supplement: supp [file elife-84322-supp-v1.zip]

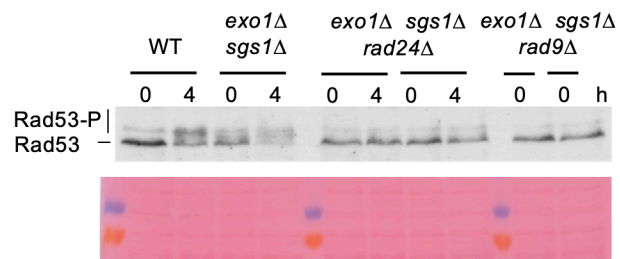

**Figure 2 – figure supplement 2.** Rad53 phosphorylation in the absence of Exo1 and Sgs1 is dependent on Rad9 and Rad24. Western blots for Rad53 phosphorylation (top) and corresponding Ponceau S staining (bottom) for the indicated strains. For *exo1Δ sgs1Δ rad24Δ*, two repeats of 0 and 4 h timepoints are shown. For *exo1Δ sgs1Δ rad9Δ*, two samples without DSB induction are shown (0 h). As a comparison, WT and *exo1Δ sgs1Δ* strains are included.
