# Supplementary material for: Long-range DNA end resection supports homologous recombination by checkpoint activation rather than extensive homology generation
Source: eLife journal article supplement (doi:10.7554/elife.84322), 2023-06-30
Supplement: supp [file elife-84322-supp-v1.zip]

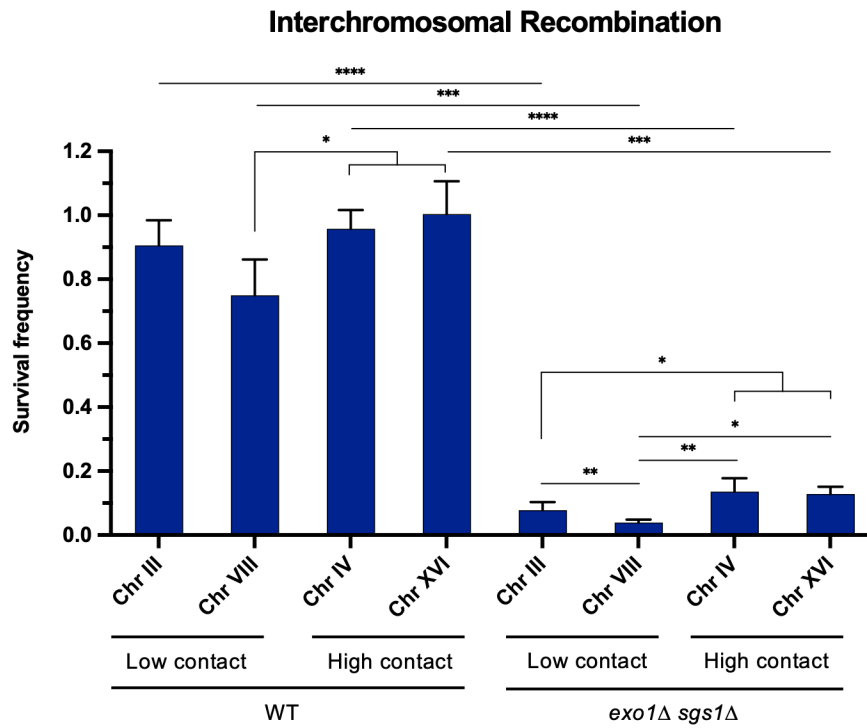

**Figure 5 – figure supplement 1.** Interchromosomal contact frequency does not significantly impact recombination efficiency. Survival frequency in the recombination plating assay for interchromosomal strains. Repair allele location is denoted by chromosome and high/low contact frequency with the DSB allele is indicated. Bars represent mean values from at least 3 plating assays per genotype. Error bars represent standard deviation. \*  $p < .05$ , \*\*  $p < .01$ , \*\*\*  $p < .001$ , \*\*\*\*  $p < .0001$ .
