# Supplementary material for: Long-range DNA end resection supports homologous recombination by checkpoint activation rather than extensive homology generation
Source: eLife journal article supplement (doi:10.7554/elife.84322), 2023-06-30
Supplement: supp [file elife-84322-supp-v1.zip]

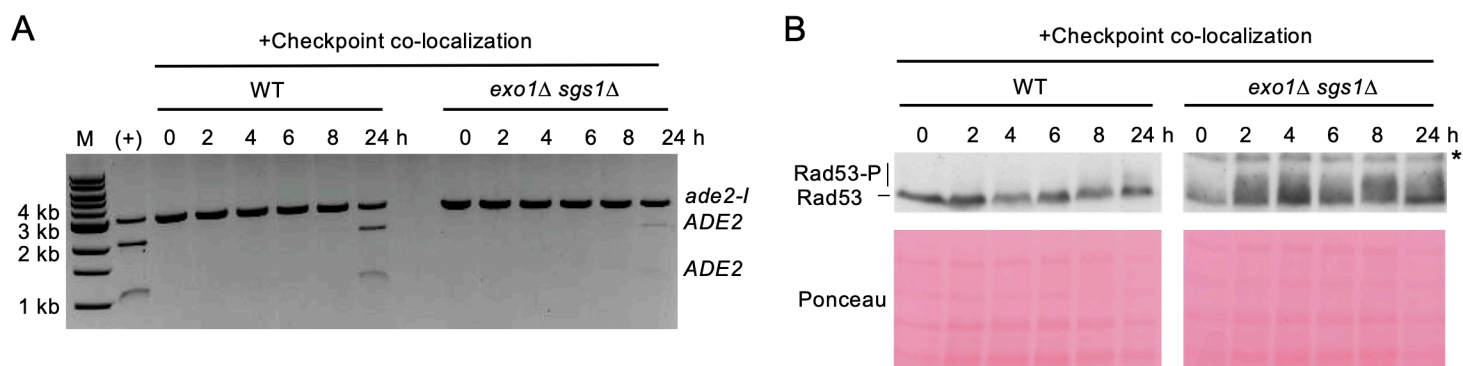

**Figure 4 – figure supplement 2.** Artificial checkpoint restoration in *exo1Δ sgs1Δ* interchromosomal strains. **(A)** Results from the PCR assay in interchromosomal assay strains with the Ddc1/Ddc2 co-localization system. The DSB and checkpoint were transiently induced with galactose for 5 hours and cells were collected at the indicated time points. A positive control for *AatII* digestion was included for reference. M refers to 1 kb size ladder (New England Biolabs). **(B)** Western blots for Rad53 phosphorylation (top) and corresponding Ponceau S staining (bottom) for the same timecourse as in A. The asterisk denotes a non-specific band detected by the HA antibody.
