# Supplementary material for: Long-range DNA end resection supports homologous recombination by checkpoint activation rather than extensive homology generation
Source: eLife journal article supplement (doi:10.7554/elife.84322), 2023-06-30
Supplement: supp [file elife-84322-supp-v1.zip]

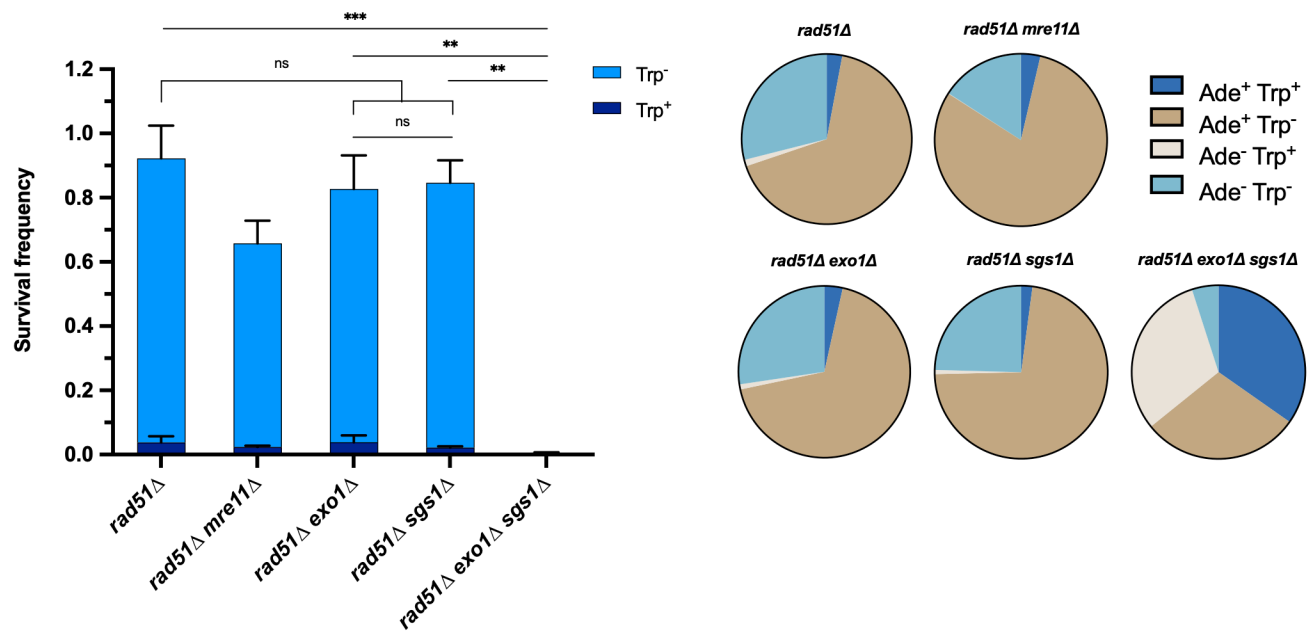

**Figure 1 – figure supplement 2.** Each of the long-range resection nucleases can independently facilitate Rad51-independent intrachromosomal repair. Survival frequency in the plating assay for the intrachromosomal *rad51Δ* strains (left) and proportion of repair outcomes in the same strains (right). Mean values from at least 3 plating assays per genotype are shown and error bars represent standard deviation. \*\*  $p < .01$ , \*\*\*  $p < .001$ .
