# Supplementary material for: Long-range DNA end resection supports homologous recombination by checkpoint activation rather than extensive homology generation
Source: eLife journal article supplement (doi:10.7554/elife.84322), 2023-06-30
Supplement: supp [file elife-84322-supp-v1.zip]

A

### Intrachromosomal recombination outcomes

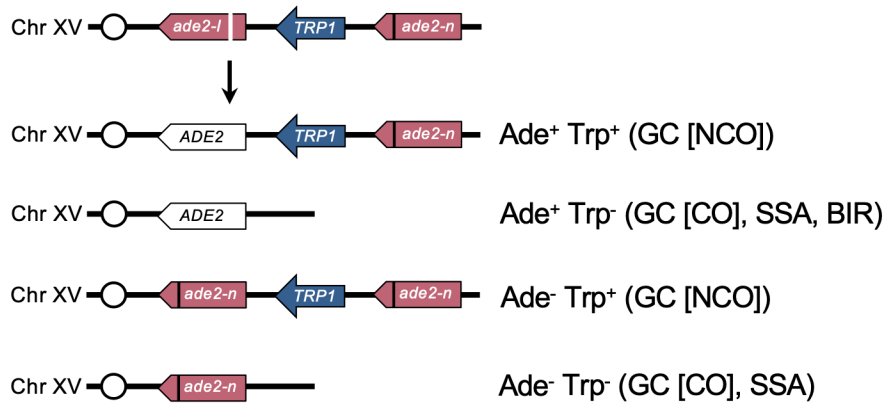

B

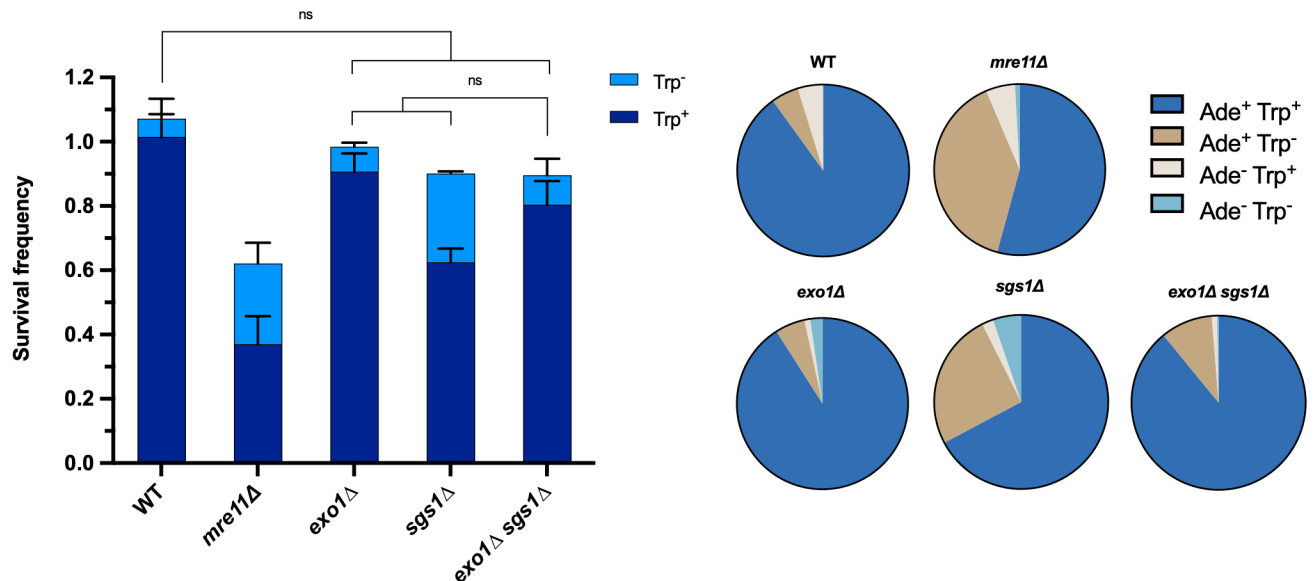

**Figure 1 - figure supplement 1.** Each of the long-range resection nucleases can independently facilitate intrachromosomal repair. **(A)** Detectable repair outcomes for the intrachromosomal assay. Cells that survive the DSB can be categorized as Ade<sup>+</sup> or Ade<sup>-</sup> based on colony color, and Trp<sup>+</sup> or Trp<sup>-</sup> based on growth on -Trp media. In parentheses, the repair pathways leading to each outcome are noted. GC = gene conversion; NCO = non-crossover; CO = crossover; SSA = single strand annealing; BIR = break induced replication. **(B)** Survival frequency in the plating assay for the intrachromosomal strains (left) and proportion of repair outcomes in the same strains (right). Mean values from at least 3 plating assays per genotype are shown and error bars represent standard deviation.
