# Supplementary material for: Long-range DNA end resection supports homologous recombination by checkpoint activation rather than extensive homology generation
Source: eLife journal article supplement (doi:10.7554/elife.84322), 2023-06-30

- checkpoint co-loc

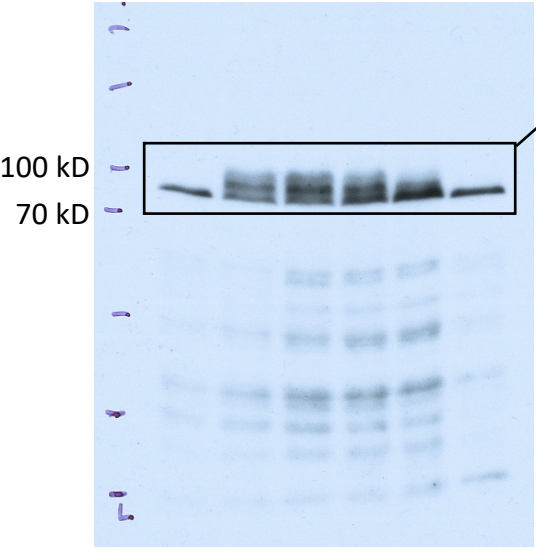

Regions cropped  
for Figure 4C

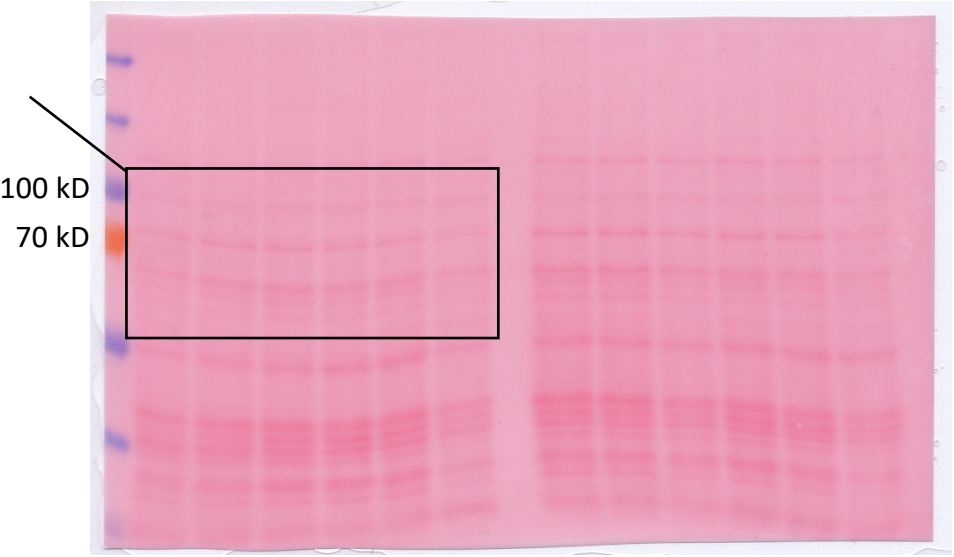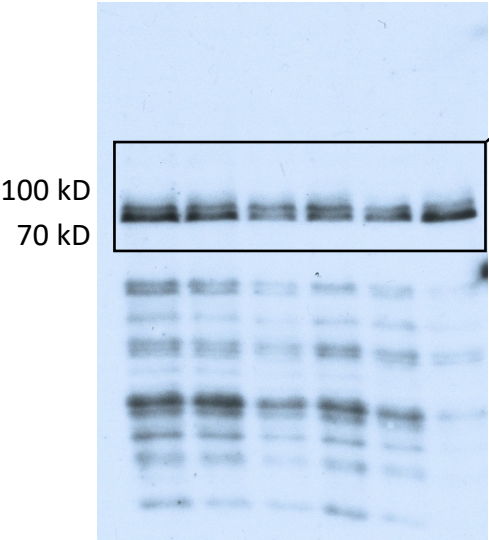

Regions cropped  
for Figure 4C

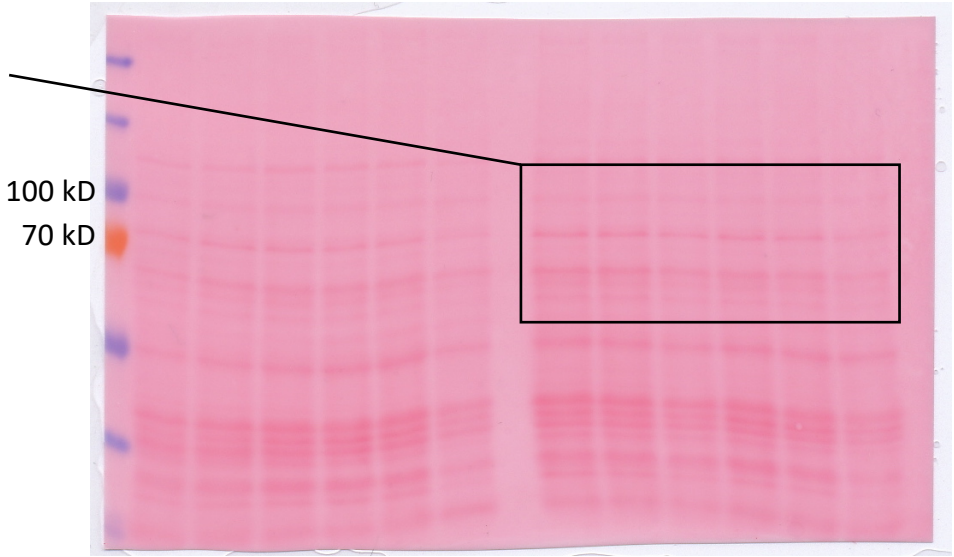

+ checkpoint co-loc

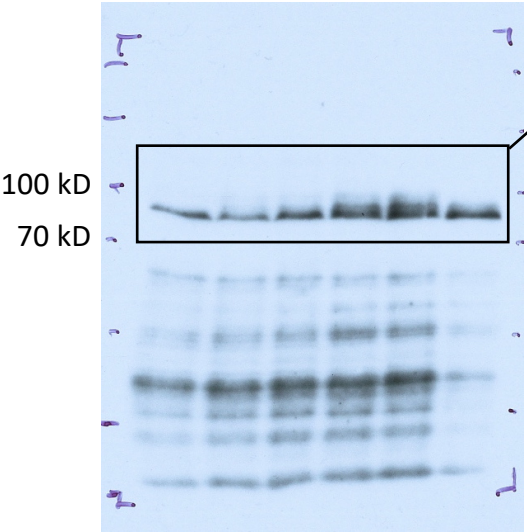

Regions cropped  
for Figure 4C

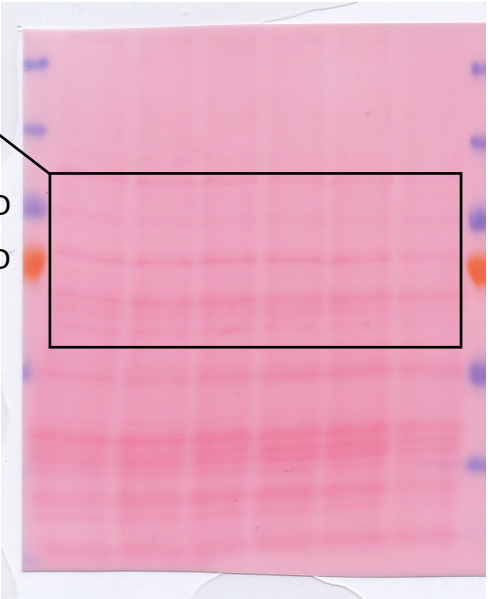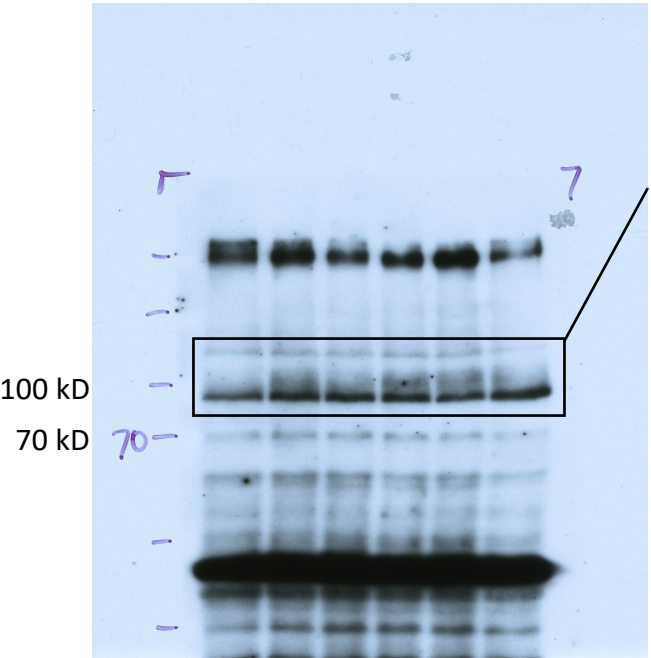

Regions cropped  
for Figure 4C

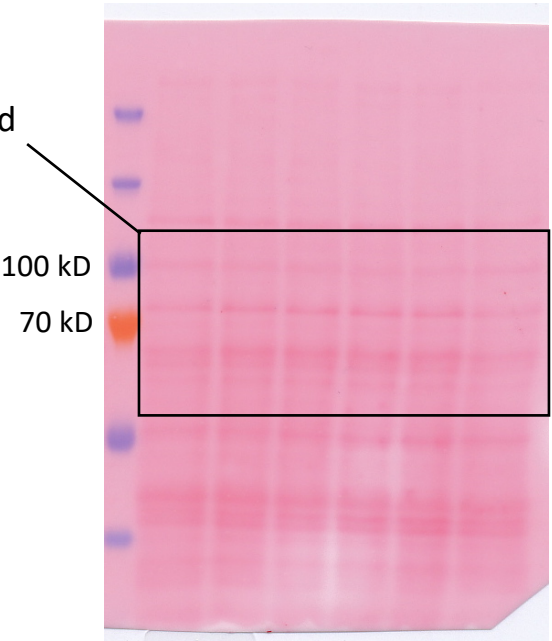

Supplement: supp [file elife-84322-supp-v1.zip]
