# Supplementary material for: Long-range DNA end resection supports homologous recombination by checkpoint activation rather than extensive homology generation
Source: eLife journal article supplement (doi:10.7554/elife.84322), 2023-06-30
Supplement: supp [file Fig1_S1- source data.xlsx]

## Sheet: Intrachromosomal RAD51
Genotype	Culture	Plate	CFU (YPAD)	% white	Average CFU (YPAD)	CFU (YPA + Gal)	% red	Average CFU (YPA + Gal)	Adjusted CFU (YPA + Gal)	Survival frequency	Average survival frequency	ST DEV
Intra WT	1	1	188	0.531915	177.5	195	8.20513	215	215	1.21127	1.0714	0.127683
		2	167	0.598802		235	6.38298									CFU YPA + Gal
	2	1	226	1.76991	215	169	8.28402	203.5	203.5	0.946512							1	2	3	4	5	6	7
		2	204	1.47059		238	4.20168									WT	215	203.5	184	203.5
	3	1	200	0	187.5	176	3.40909	184	184	0.981333						mre11	32.75	50.5	67.75	93.75
		2	175	0.571429		192	4.16667									exo1	430	528.5	396.5
	4	1	189	1.0582	177.5	190	1.57895	203.5	203.5	1.14648						sgs1	370	271	321
		2	166	0		217	2.76498									exo1 sgs1	108	80	88.5	162	363	381	316
																Trp+ on YPA + Gal										Trp+ survival frequency
Genotype	Culture	Plate	CFU (YPAD)	% white	Average CFU (YPAD)	CFU (YPA + Gal)	% red	Average CFU (YPA + Gal)	Adjusted CFU (YPA + Gal)	Survival frequency	Average survival frequency	ST DEV					1	2	3	4	5	6	7				1	2	3	4	5	6	7
Intra mre11	1	1	68	0	79	71	9.85915	65.5	32.75	0.414557	0.621237	0.146446				WT	201.5	191.5	176	194.5						WT	1.13521	0.890698	0.938667	1.09577
		2	90	0		60	10									mre11	20.25	29.75	42.25	52.5						mre11	0.256329	0.369565	0.466851	0.388889
	2	1	67	1.49254	80.5	108	7.40741	101	50.5	0.627329						exo1	400.5	476.5	368							exo1	0.940141	0.84113	0.938776
		2	94	0		94	6.38298									sgs1	251	191	224							sgs1	0.586449	0.670175	0.618785
	3	1	107	1.86916	90.5	151	4.63576	135.5	67.75	0.748619						exo1 sgs1	97.5	76	84	148	301	325	287			exo1 sgs1	0.724907	0.8	0.908108	0.753181	0.903904	0.783133	0.759259
		2	74	1.35135		120	7.5
	4	1	121	0	135	167	3.59281	187.5	93.75	0.694444
		2	149	0		208	2.40385									Fraction Trp+ on YPA + Gal										Trp- survival frequency
																	1	2	3	4	5	6	7	Average			1	2	3	4	5	6	7
																WT	0.937209	0.941032	0.956522	0.955774				0.947634		WT	0.0760563	0.055814	0.0426667	0.0507042
																mre11	0.618321	0.589109	0.623616	0.56				0.597761		mre11	0.158228	0.257764	0.281768	0.305556
Genotype	Culture	Plate	CFU (YPAD)	% white	Average CFU (YPAD)	CFU (YPA + Gal)	% red	Average CFU (YPA + Gal)	Adjusted CFU (YPA + Gal)	Survival frequency	Average survival frequency	ST DEV				exo1	0.931395	0.901608	0.928121					0.920375		exo1	0.0692488	0.0917917	0.0727041
Intra exo1	1	1	420	1.90476	426	419	1.43198	430	430	1.00939	0.984597	0.0447645				sgs1	0.678378	0.704797	0.697819					0.693665		sgs1	0.278037	0.280702	0.267956
		2	432	2.5463		441	1.5873									exo1 sgs1	0.902778	0.95	0.949153	0.91358	0.829201	0.853018	0.908228	0.900851		exo1 sgs1	0.0780669	0.0421053	0.0486486	0.0712468	0.186186	0.13494	0.0767196
	2	1	541	0.184843	566.5	518	1.9305	528.5	528.5	0.932921
		2	592	2.02703		539	3.33952																			For pie graphs:
	3	1	393	1.52672	392	404	3.21782	396.5	396.5	1.01148
		2	391	3.58056		389	2.05656									Trp+ Ade+										Fraction Trp+ Ade+
																	1	2	3	4	5	6	7				1	2	3	4	5	6	7	Average
																WT	186.5	179.5	169	190						WT	0.867442	0.882064	0.918478	0.933661				0.900411
																mre11	17.5	27	38.25	50.25						mre11	0.534351	0.534653	0.564576	0.536				0.542395
Genotype	Culture	Plate	CFU (YPAD)	% white	Average CFU (YPAD)	CFU (YPA + Gal)	% red	Average CFU (YPA + Gal)	Adjusted CFU (YPA + Gal)	Survival frequency	Average survival frequency	ST DEV				exo1	396	473.5	361.5							exo1	0.92093	0.895932	0.911728					0.90953
Intra sgs1	1	1	388	12.6289	428	426	5.16432	370	370	0.864486	0.900701	0.0448558				sgs1	245	184	217							sgs1	0.662162	0.678967	0.676012					0.67238
		2	468	9.40171		314	5.73248									exo1 sgs1	95.5	75.5	82.5	146	298	323.5	286			exo1 sgs1	0.884259	0.94375	0.932203	0.901235	0.820937	0.849081	0.905063	0.890933
	2	1	286	16.0839	285	274	7.29927	271	271	0.950877
		2	284	7.74648		268	8.20896									Trp+ Ade-										Fraction Trp+ Ade-
	3	1	316	16.4557	362	294	4.7619	321	321	0.88674							1	2	3	4	5	6	7				1	2	3	4	5	6	7	Average
		2	408	7.84314		348	5.74713									WT	15	12	7	4.5						WT	0.0697674	0.0589681	0.0380435	0.022113				0.047223
																mre11	2.75	2.75	4	2.25						mre11	0.0839695	0.0544554	0.0590406	0.024				0.0553664
																exo1	4.5	3	6.5							exo1	0.0104651	0.00567644	0.0163934					0.010845
																sgs1	6	7	7							sgs1	0.0162162	0.0258303	0.0218069					0.0212844
Genotype	Culture	Plate	CFU (YPAD)	% white	Average CFU (YPAD)	CFU (YPA + Gal)	% red	Average CFU (YPA + Gal)	Adjusted CFU (YPA + Gal)	Survival frequency	Average survival frequency	ST DEV				exo1 sgs1	2	0.5	1.5	2	3	1.5	1			exo1 sgs1	0.0185185	0.00625	0.0169492	0.0123457	0.00826446	0.00393701	0.00316456	0.00991848
Intra exo1 sgs1	1	1	124	1.6129	134.5	95	0	108	108	0.802974	0.895772	0.101762
		2	145	0.689655		121	3.30579									Trp- Ade+										Fraction Trp- Ade+
	2	1	103	0.970874	95	77	0	80	80	0.842105							1	2	3	4	5	6	7				1	2	3	4	5	6	7	Average
		2	87	0		83	1.20482									WT	13	12	8	9						WT	0.0604651	0.0589681	0.0434783	0.044226				0.0517844
	3	1	96	4.16667	92.5	96	1.04167	88.5	88.5	0.956757						mre11	12	20	25.5	40.75						mre11	0.366412	0.39604	0.376384	0.434667				0.393376
		2	89	1.1236		81	2.46914									exo1	23	36	19							exo1	0.0534884	0.0681173	0.0479193					0.0565083
	4	1	206	0.970874	196.5	169	1.77515	162	162	0.824427						sgs1	99	62	85							sgs1	0.267568	0.228782	0.264798					0.253716
		2	187	0.534759		155	0.645161									exo1 sgs1	10.5	4	4.5	14	60.5	54	26			exo1 sgs1	0.0972222	0.05	0.0508475	0.0864198	0.166667	0.141732	0.0822785	0.0964524
	5	1	342	0.292398	333	374	1.06952	363	363	1.09009
		2	324	1.23457		352	1.42045									Trp- Ade-										Fraction Trp- Ade-
	6	1	372	1.88172	415	390	0.25641	381	381	0.918072							1	2	3	4	5	6	7				1	2	3	4	5	6	7	Average
		2	458	1.0917		372	1.07527									WT	0.5	0	0	0						WT	0.00232558	0	0	0				0.000581395
	7	1	372	1.07527	378	300	1.33333	316	316	0.835979						mre11	0.5	0.75	0	0.5						mre11	0.0152672	0.0148515	0	0.00533333				0.008863
		2	384	0.78125		332	0.903614									exo1	6.5	16	9.5							exo1	0.0151163	0.0302744	0.0239596					0.0231168
																sgs1	20	18	12							sgs1	0.0540541	0.0664207	0.0373832					0.0526193
																exo1 sgs1	0	0	0	0	1.5	2	3			exo1 sgs1	0	0	0	0	0.00413223	0.00524934	0.00949367	0.00269646
Genotypes compared	p-value	Indicator
WT-exo1∆ sgs1∆	0.0628058	ns
WT-mre11∆	0.00373602	**
exo1∆ sgs1∆-mre11∆	0.0230373	*
WT-exo1∆	0.277595	ns
WT-sgs1∆	0.0698286	ns
exo1∆-exo1∆sgs1∆	0.0922865	ns
sgs1∆-exo1∆sgs1∆	0.918012	ns
