# Supplementary material for: Long-range DNA end resection supports homologous recombination by checkpoint activation rather than extensive homology generation
Source: eLife journal article supplement (doi:10.7554/elife.84322), 2023-06-30
Supplement: supp [file Fig1_S2- source data.xlsx]

## Sheet: Intrachromosomal rad51∆
Genotype	Culture	Plate	CFU (YPAD)	% white	Average CFU (YPAD)	CFU (YPA + Gal)	% red	Average CFU (YPA + Gal)	Adjusted CFU (YPA + Gal)	Survival frequency	Average survival frequency	ST DEV
Intra rad51	1	1	422	1.4218	400.5	335	28.9552	341.5	341.5	0.852684	0.922106	0.0928953
		2	379	2.37467		348	33.046									CFU YPA + Gal
	2	1	135	0	152	148	31.7568	135	135	0.888158							1	2	3	4	5	6	7
		2	169	0.591716		122	37.7049									WT	341.5	135	188	533.5
	3	1	125	0	177.5	190	33.6842	188	188	1.05915						mre11	399.5	174.5	193	122
		2	230	0.434783		186	31.1828									exo1	152.5	74.5	169
	4	1	613	13.2137	600.5	519	23.1214	533.5	533.5	0.888426						sgs1	563	563	307
		2	588	12.415		548	22.4453									exo1 sgs1	270	270	135	73.5	63.5	58	62
																Trp+ on YPA + Gal										Trp+ survival frequency
Genotype	Culture	Plate	CFU (YPAD)	% white	Average CFU (YPAD)	CFU (YPA + Gal)	% red	Average CFU (YPA + Gal)	Adjusted CFU (YPA + Gal)	Survival frequency	Average survival frequency	ST DEV					1	2	3	4	5	6	7				1	2	3	4	5	6	7
Intra rad51 mre11	1	1	302	0	293	406	26.1084	399.5	199.75	0.681741	0.657812	0.0668272				WT	20.5	8.5	5	9.5						WT	0.051186	0.0559211	0.028169	0.0158201
		2	284	1.05634		393	19.8473									mre11	12.5	5	10	4.5						mre11	0.0213311	0.0207469	0.0293255	0.0243243
	2	1	116	0	120.5	169	25.4438	174.5	87.25	0.724066						exo1	9	1.5	9							exo1	0.0543807	0.0137615	0.0466321
		2	125	0		180	21.1111									sgs1	15.5	11	9.5							sgs1	0.0245447	0.0171971	0.02375
	3	1	151	0	170.5	193	18	193	96.5	0.565982						exo1 sgs1	211	58.5	84.5	35.5	42	37.5	39.5			exo1 sgs1	0.00378475	0.00107467	0.00450667	0.002272	0.00461538	0.00421348	0.00362385
		2	190	0			#DIV/0!
	4	1	88	0	92.5	123	10.5691	122	61	0.659459
		2	97	0		121	5.78512									Fraction Trp+ on YPA + Gal										Trp- survival frequency
																	1	2	3	4	5	6	7	Average			1	2	3	4	5	6	7
																WT	0.0600293	0.062963	0.0265957	0.0178069				0.0418487		WT	0.801498	0.832237	1.03099	0.872606
																mre11	0.0312891	0.0286533	0.0518135	0.0368852				0.0371603		mre11	0.66041	0.70332	0.536657	0.635135
Genotype	Culture	Plate	CFU (YPAD)	% white	Average CFU (YPAD)	CFU (YPA + Gal)	% red	Average CFU (YPA + Gal)	Adjusted CFU (YPA + Gal)	Survival frequency	Average survival frequency	ST DEV				exo1	0.0590164	0.0201342	0.0532544					0.044135		exo1	0.867069	0.669725	0.829016
Intra rad51 exo1	1	1	177	5.64972	165.5	139	31.6547	152.5	152.5	0.92145	0.826861	0.126261				sgs1	0.0275311	0.0195382	0.0309446					0.0260046		sgs1	0.866983	0.862982	0.74375
		2	154	8.44156		166	31.3253									exo1 sgs1	0.781481	0.216667	0.625926	0.482993	0.661417	0.646552	0.637097	0.578876		exo1 sgs1	0.0010583	0.00388533	0.00269333	0.002432	0.00236264	0.00230337	0.00206422
	2	1	111	10.8108	109	71	26.7606	74.5	74.5	0.683486
		2	107	3.73832		78	20.5128																			For pie graphs:
	3	1	215	10.2326	193	180	32.2222	169	169	0.875648
		2	171	8.18713		158	24.0506									Trp+ Ade+										Fraction Trp+ Ade+
																	1	2	3	4	5	6	7				1	2	3	4	5	6	7	Average
																WT	16.5	4.5	3.5	9.5						WT	0.0483163	0.0333333	0.018617	0.0178069				0.0295184
																mre11	11.5	5	10	4.5						mre11	0.028786	0.0286533	0.0518135	0.0368852				0.0365345
Genotype	Culture	Plate	CFU (YPAD)	% white	Average CFU (YPAD)	CFU (YPA + Gal)	% red	Average CFU (YPA + Gal)	Adjusted CFU (YPA + Gal)	Survival frequency	Average survival frequency	ST DEV				exo1	7	1	7.5							exo1	0.0459016	0.0134228	0.0443787					0.0345677
Intra rad51 sgs1	1	1	631	8.55784	631.5	574	16.7247	563	563	0.891528	0.846402	0.0685667				sgs1	14	8	5.5							sgs1	0.0248668	0.0142096	0.0179153					0.0189972
		2	632	8.5443		552	17.7536									exo1 sgs1	101.5	35.5	68	21	15.5	14	20			exo1 sgs1	0.375926	0.131481	0.503704	0.285714	0.244094	0.241379	0.322581	0.300697
	2	1	476	13.2353	446.5	412	19.9029	393	393	0.880179
		2	417	13.1894		374	19.7861									Trp+ Ade-										Fraction Trp+ Ade-
	3	1	407	9.33661	400	336	16.6667	307	307	0.7675							1	2	3	4	5	6	7				1	2	3	4	5	6	7	Average
		2	393	13.486		278	22.3022									WT	4	4	1.5	0						WT	0.011713	0.0296296	0.00797872	0				0.0123303
																mre11	1	0	0	0						mre11	0.00250313	0	0	0				0.000625782
																exo1	2	0.5	1.5							exo1	0.0131148	0.00671141	0.00887574					0.0095673
																sgs1	1.5	3	4							sgs1	0.0026643	0.0053286	0.0130293					0.0070074
Genotype	Culture	Plate	CFU (YPAD)	% white	Average CFU (YPAD)	CFU (YPA + Gal)	% red	Average CFU (YPA + Gal)	Adjusted CFU (YPA + Gal)	Survival frequency	Average survival frequency	ST DEV				exo1 sgs1	109.5	23	16.5	14.5	26.5	23.5	19.5			exo1 sgs1	0.405556	0.0851852	0.122222	0.197279	0.417323	0.405172	0.314516	0.278179
Intra rad51 exo1 sgs1	1	1	216	1.38889	223	255	45.098	270	1.08	0.00484305	0.00584143	0.00105552
		2	230	0.869565		285	39.2982									Trp- Ade+										Fraction Trp- Ade+
	2	1	51	0	62.5	79	24.0506	77.5	0.31	0.00496							1	2	3	4	5	6	7				1	2	3	4	5	6	7	Average
		2	74	0		76	42.1053									WT	219	84	123.5	402.5						WT	0.641288	0.622222	0.656915	0.754452				0.668719
	3	1	74	0	75	130	18.4615	135	0.54	0.0072						mre11	296	129	165	107.5						mre11	0.740926	0.739255	0.854922	0.881148				0.804063
		2	76	0		140	22.1429									exo1	96.5	56	112							exo1	0.632787	0.751678	0.662722					0.682396
	4	1	56	0	62.5	90	31.1111	73.5	0.294	0.004704						sgs1	405	289	221.5							sgs1	0.719361	0.513321	0.721498					0.651393
		2	69	0		57	24.5614									exo1 sgs1	55	16.5	39.5	31.5	19.5	19	18			exo1 sgs1	0.203704	0.0611111	0.292593	0.428571	0.307087	0.327586	0.290323	0.272996
	5	1	49	2.04082	45.5	60	53.3333	63.5	0.3175	0.00697802
		2	42	0		67	56.7164									Trp- Ade-										Fraction Trp- Ade-
	6	1	47	4.25532	44.5	63	53.9683	58	0.29	0.00651685							1	2	3	4	5	6	7				1	2	3	4	5	6	7	Average
		2	42	7.14286		53	60.3774									WT	102	42.5	59.5	121.5						WT	0.298682	0.314815	0.316489	0.227741				0.289432
	7	1	57	1.75439	54.5	66	68.1818	62	0.31	0.00568807						mre11	91	40.5	18	10						mre11	0.227785	0.232092	0.0932642	0.0819672				0.158777
		2	52	0		58	53.4483									exo1	47	17	48							exo1	0.308197	0.228188	0.284024					0.273469
																sgs1	142.5	93	76							sgs1	0.253108	0.165187	0.247557					0.221951
																exo1 sgs1	4	2.5	11	6.5	2	1.5	4.5			exo1 sgs1	0.0148148	0.00925926	0.0814815	0.0884354	0.0314961	0.0258621	0.0725806	0.0462757
Genotypes compared	p-value	Indicator
rad51∆-rad51∆ mre11∆	0.00462488	**
rad51∆-rad51∆ exo1∆	0.339331	ns
rad51∆-rad51∆ sgs1∆	0.269932	ns
rad51∆-rad51∆ exo1∆ sgs1∆	0.00028441	***
rad51∆ exo1∆-rad51∆ exo1∆ sgs1∆	0.00778986	**
rad51∆ sgs1∆-rad51∆ exo1∆ sgs1∆	0.00220874	**
rad51∆ exo1∆-rad51∆ sgs1∆	0.828541	ns
