# Supplementary material for: Long-range DNA end resection supports homologous recombination by checkpoint activation rather than extensive homology generation
Source: eLife journal article supplement (doi:10.7554/elife.84322), 2023-06-30
Supplement: supp [file Fig1_S3- source data.xlsx]

## Sheet: Interchromosomal
Genotype	Culture	Plate	CFU (YPAD)	% white	Average CFU (YPAD)	CFU (YPA + Gal)	% red	Average CFU (YPA + Gal)	Adjusted CFU (YPA + Gal)	Survival frequency	Average survival frequency	ST DEV
Inter WT	1	1	369	1.08401	376	310	5.80645	327.5	327.5	0.871011	0.905719	0.0786746
		2	383	2.87206		345	5.7971
	2	1	138	3.62319	144.5	120	4.16667	131	131	0.906574
		2	151	1.98675		142	3.52113
	3	1	197	1.01523	186	157	1.91083	173.5	173.5	0.932796
		2	175	6.28571		190	4.73684
	4	1	141	4.25532	129.5	97	2.06186	102.5	102.5	0.791506
		2	118	5.08475		108	4.62963
	5	1	322	1.5528	321.5	312	2.5641	289.5	289.5	0.900467
		2	321	1.86916		267	3.37079
	6	1	238	0.840336	219	222	3.6036	226	226	1.03196
		2	200	2.5		230	3.47826
Genotype	Culture	Plate	CFU (YPAD)	% white	Average CFU (YPAD)	CFU (YPA + Gal)	% red	Average CFU (YPA + Gal)	Adjusted CFU (YPA + Gal)	Survival frequency	Average survival frequency	ST DEV
Inter exo1	1	1	300	5.33333	299.5	252	3.1746	246.5	246.5	0.823038	0.85625	0.0397561
		2	299	4.68227		241	2.48963
	2	1	100	5	103.5	99	3.0303	87.5	87.5	0.845411
		2	107	4.6729		76	1.31579
	3	1	149	10.0671	165.5	149	5.36913	149	149	0.900302
		2	182	6.59341		149	3.3557
	4	1	189	1.0582	171	177	2.82486	177.5	177.5	1.03801
		2	153	0.653595		178	3.93258
Genotype	Culture	Plate	CFU (YPAD)	% white	Average CFU (YPAD)	CFU (YPA + Gal)	% red	Average CFU (YPA + Gal)	Adjusted CFU (YPA + Gal)	Survival frequency	Average survival frequency	ST DEV
Inter sgs1	1	1	121	0	139	374	1.3369	360	90	0.647482	0.779568	0.117313
		2	157	2.54777		346	0.867052
	2	1	177	10.1695	194	297	6.39731	318	159	0.819588
		2	211	9.47867		339	5.01475
	3	1	254	0	241.5	202	5.44554	210.5	210.5	0.871636
		2	229	0		219	4.56621
	4	1	348	0.862069	314.5	294	9.86395	293	293	0.931638
		2	281	0.355872		292	3.76712
Genotype	Culture	Plate	CFU (YPAD)	% white	Average CFU (YPAD)	CFU (YPA + Gal)	% red	Average CFU (YPA + Gal)	Adjusted CFU (YPA + Gal)	Survival frequency	Average survival frequency	ST DEV
Inter exo1 sgs1	1	1	137	0	116	107	0	95	9.5	0.0818966	0.0777871	0.025245
		2	95	0		83	0
	2	1	566	0	572.5	304	7.56579	334.5	33.45	0.0584279
		2	579	0		365	4.93151
	3	1	484	0	479.5	369	2.16802	414	41.4	0.0863399
		2	475	0		459	2.83224
	4	1	134	2.23881	131	52	0	65	6.5	0.0496183
		2	128	1.5625		78	3.84615
	5	1	160	2.5	169.5	79	3.79747	91	9.1	0.0536873
		2	179	2.7933		103	7.76699
	6	1	102	0	104.5	82	1.21951	100.5	10.05	0.0961722
		2	107	0		119	0.840336
	7	1	40	17.5	49	61	0	58	5.8	0.118367
		2	58	3.44828		55	1.81818
Genotypes compared	p-value	indicator
WT-exo1∆	0.947008	ns
WT-sgs1∆	0.261722	ns
WT-exo1∆ sgs1∆	3.60863e-07	****
exo1∆-exo1∆ sgs1∆	0.000295783	***
sgs1∆-exo1∆ sgs1∆	0.000999013	***
