# Supplementary material for: Long-range DNA end resection supports homologous recombination by checkpoint activation rather than extensive homology generation
Source: eLife journal article supplement (doi:10.7554/elife.84322), 2023-06-30
Supplement: supp [file Fig2_S1- source data.xlsx]

## Sheet: WT I-SceI cutting
TRIAL 1	Ct values				MD											TRIAL 2	Ct values				MD
t0 I-SceI	19.5884			primer	1	2	3	Mean	SD	I-SceI cut corr	Ctn-Ct0	I-SceI cut				t0 I-SceI	19.33			primer	1	2	3	Mean	SD	I-SceI cut corr	Ctn-Ct0	I-SceI cut
t0 I-SceI	19.5979		t0	I-SceI	19.5884	19.5979	18.3779	19.1881	0.701653							t0 I-SceI	19.0914		t0	I-SceI	19.33	19.0914	18.8713	19.0976	0.229437
t0 I-SceI	18.3779			ADH1	17.4295	17.2669	17.0177	17.238	0.207403	1.95002	0	0				t0 I-SceI	18.8713			ADH1	17.3074	17.3158	17.2626	17.2952	0.0286094	1.80234	0	0
t0 ADH1	17.4295		t1	I-SceI	19.6918	19.3719	19.2949	19.4529	0.210457							t0 ADH1	17.3074		t1	I-SceI	19.6548	19.2646	19.1487	19.3561	0.265158
t0 ADH1	17.2669			ADH1	17.2871	17.2062	17.2151	17.2361	0.0443812	2.21671	0.266692	0.168777				t0 ADH1	17.3158			ADH1	17.3502	17.2154	17.3327	17.2994	0.0732994	2.05663	0.254282	0.161596
t0 ADH1	17.0177		t2	I-SceI	21.0832	20.4376	20.4369	20.6525	0.372929							t0 ADH1	17.2626		t2	I-SceI	20.6439	20.2398	20.1363	20.34	0.268203
t1 I-SceI	19.6918			ADH1	17.3931	17.161	17.2113	17.2551	0.122129	3.39742	1.44741	0.63332				t1 I-SceI	19.6548			ADH1	17.2553	17.1497	17.3628	17.256	0.106579	3.08404	1.2817	0.58869
t1 I-SceI	19.3719		t3	I-SceI	22.2871	21.2971	21.5327	21.7056	0.51719							t1 I-SceI	19.2646		t3	I-SceI	21.4621	21.1636	21.0594	21.2284	0.209011
t1 I-SceI	19.2949			ADH2	17.2826	17.2559	17.2118	17.2501	0.0357874	4.45552	2.23881	0.78814				t1 I-SceI	19.1487			ADH2	17.3204	17.1219	17.2448	17.229	0.100198	3.99935	1.94272	0.739875
t1 ADH1	17.2871		t4	I-SceI	23.6621	22.3154	22.1833	22.7203	0.818337							t1 ADH1	17.3502		t4	I-SceI	22.1653	22.0497	21.8613	22.0254	0.153465
t1 ADH1	17.2062			ADH1	17.3475	17.365	17.1357	17.2827	0.127654	5.43755	3.48753	0.910844				t1 ADH1	17.2154			ADH1	17.4641	17.2336	17.2979	17.3319	0.118927	4.69354	2.89119	0.865208
t1 ADH1	17.2151		t6	I-SceI	23.907	23.293	23.2921	23.4974	0.354729							t1 ADH1	17.3327		t6	I-SceI	23.8653	23.4722	23.3093	23.5489	0.285802
t2 I-SceI	21.0832			ADH1	17.6626	17.7727	17.578	17.6711	0.0976019	5.82625	3.87624	0.931902				t2 I-SceI	20.6439			ADH1	17.829	17.715	17.6085	17.7175	0.110296	5.83142	4.02907	0.938747
t2 I-SceI	20.4376															t2 I-SceI	20.2398
t2 I-SceI	20.4369															t2 I-SceI	20.1363
t2 ADH1	17.3931															t2 ADH1	17.2553
t2 ADH1	17.161			time (h)	cut fraction											t2 ADH1	17.1497			time (h)	cut fraction
t2 ADH1	17.2113			0	0											t2 ADH1	17.3628			0	0
t3 I-SceI	22.2871			1	0.168777											t3 I-SceI	21.4621			1	0.161596
t3 I-SceI	21.2971			2	0.63332											t3 I-SceI	21.1636			2	0.58869
t3 I-SceI	21.5327			3	0.78814											t3 I-SceI	21.0594			3	0.739875
t3 ADH1	17.2826			4	0.910844											t3 ADH1	17.3204			4	0.865208
t3 ADH1	17.2559			6	0.931902											t3 ADH1	17.1219			6	0.938747
t3 ADH1	17.2118															t3 ADH1	17.2448
t4 I-SceI	23.6621															t4 I-SceI	22.1653
t4 I-SceI	22.3154															t4 I-SceI	22.0497
t4 I-SceI	22.1833															t4 I-SceI	21.8613
t4 ADH1	17.3475															t4 ADH1	17.4641
t4 ADH1	17.365															t4 ADH1	17.2336
t4 ADH1	17.1357															t4 ADH1	17.2979
t6 I-SceI	23.907															t6 I-SceI	23.8653
t6 I-SceI	23.293															t6 I-SceI	23.4722
t6 I-SceI	23.2921															t6 I-SceI	23.3093
t6 ADH1	17.6626															t6 ADH1	17.829
t6 ADH1	17.7727															t6 ADH1	17.715
t6 ADH1	17.578															t6 ADH1	17.6085

## Sheet: exo1 sgs1 I-SceI cutting
TRIAL 1	Ct values				MD											TRIAL 2	Ct values				MD
t0 I-SceI	19.7209			primer	1	2	3	Mean	SD	I-SceI cut corr	Ctn-Ct0	I-SceI cut				t0 I-SceI	19.7877			primer	1	2	3	Mean	SD	I-SceI cut corr	Ctn-Ct0	I-SceI cut
t0 I-SceI	20.0023		t0	I-SceI	19.7209	20.0023	19.9155	19.8795	0.144098							t0 I-SceI	19.3539		t0	I-SceI	19.7877	19.3539	19.1669	19.4362	0.318452
t0 I-SceI	19.9155			ADH1	18.2293	18.1684	18.2405	18.2128	0.0387941	1.66677	0	0				t0 I-SceI	19.1669			ADH1	17.8287	17.672	17.888	17.7963	0.111599	1.63989	0	0
t0 ADH1	18.2293		t1	I-SceI	19.8851	20.1874	20.0464	20.0396	0.151275							t0 ADH1	17.8287		t1	I-SceI	20.1594	19.7249	19.6794	19.8546	0.264974
t0 ADH1	18.1684			ADH1	18.2119	18.1716	18.2648	18.2161	0.0467653	1.82351	0.156734	0.102946				t0 ADH1	17.672			ADH1	17.9373	18.0515	18.0305	18.0064	0.0607487	1.84819	0.2083	0.134443
t0 ADH1	18.2405		t2	I-SceI	20.5343	20.7099	20.6292	20.6244	0.0879096							t0 ADH1	17.888		t2	I-SceI	20.4395	20.1078	20.0271	20.1915	0.218576
t1 I-SceI	19.8851			ADH1	18.0537	18.1458	18.0884	18.096	0.0465231	2.52848	0.861704	0.449698				t1 I-SceI	20.1594			ADH1	17.4767	17.8276	17.461	17.5884	0.20729	2.60305	0.96316	0.487068
t1 I-SceI	20.1874		t3	I-SceI	21.2349	21.4889	21.3085	21.3441	0.130718							t1 I-SceI	19.7249		t3	I-SceI	21.7682	21.0951	20.846	21.2364	0.47709
t1 I-SceI	20.0464			ADH2	18.2052	18.0572	18.2168	18.1597	0.088994	3.18437	1.36087	0.610651				t1 I-SceI	19.6794			ADH2	18.0372	17.9434	18.0621	18.0142	0.0626037	3.22221	1.37402	0.614186
t1 ADH1	18.2119		t4	I-SceI	21.755	22.0931	21.8952	21.9144	0.169865							t1 ADH1	17.9373		t4	I-SceI	21.0124	20.5902	20.3298	20.6441	0.344483
t1 ADH1	18.1716			ADH1	18.2269	18.1526	18.1388	18.1728	0.0473887	3.74163	2.07486	0.762642				t1 ADH1	18.0515			ADH1	17.0747	16.8688	17.0639	17.0024	0.115889	3.64166	2.00177	0.750307
t1 ADH1	18.2648		t6	I-SceI	22.7353	23.0248	22.789	22.8497	0.15404							t1 ADH1	18.0305		t6	I-SceI	22.6741	22.3937	22.085	22.3843	0.294659
t2 I-SceI	20.5343			ADH1	18.5062	18.4264	18.531	18.4879	0.0546575	4.3618	2.69503	0.845576				t2 I-SceI	20.4395			ADH1	18.1456	18.0739	18.1199	18.1131	0.0363109	4.27117	2.63128	0.838599
t2 I-SceI	20.7099															t2 I-SceI	20.1078
t2 I-SceI	20.6292															t2 I-SceI	20.0271
t2 ADH1	18.0537															t2 ADH1	17.4767
t2 ADH1	18.1458			time (h)	cut fraction											t2 ADH1	17.8276			time (h)	cut fraction
t2 ADH1	18.0884			0	0											t2 ADH1	17.461			0	0
t3 I-SceI	21.2349			1	0.102946											t3 I-SceI	21.7682			1	0.134443
t3 I-SceI	21.4889			2	0.449698											t3 I-SceI	21.0951			2	0.487068
t3 I-SceI	21.3085			3	0.610651											t3 I-SceI	20.846			3	0.614186
t3 ADH1	18.2052			4	0.762642											t3 ADH1	18.0372			4	0.750307
t3 ADH1	18.0572			6	0.845576											t3 ADH1	17.9434			6	0.838599
t3 ADH1	18.2168															t3 ADH1	18.0621
t4 I-SceI	21.755															t4 I-SceI	21.0124
t4 I-SceI	22.0931															t4 I-SceI	20.5902
t4 I-SceI	21.8952															t4 I-SceI	20.3298
t4 ADH1	18.2269															t4 ADH1	17.0747
t4 ADH1	18.1526															t4 ADH1	16.8688
t4 ADH1	18.1388															t4 ADH1	17.0639
t6 I-SceI	22.7353															t6 I-SceI	22.6741
t6 I-SceI	23.0248															t6 I-SceI	22.3937
t6 I-SceI	22.789															t6 I-SceI	22.085
t6 ADH1	18.5062															t6 ADH1	18.1456
t6 ADH1	18.4264															t6 ADH1	18.0739
t6 ADH1	18.531															t6 ADH1	18.1199
