# Supplementary material for: Long-range DNA end resection supports homologous recombination by checkpoint activation rather than extensive homology generation
Source: eLife journal article supplement (doi:10.7554/elife.84322), 2023-06-30
Supplement: supp [file Fig3_S1- source data.xlsx]

## Sheet: Summary 
Biological replicate #1	WT				rad24				exo1 sgs1				exo1 sgs1 rad24				rad9	exo1 sgs1 rad9
Time (h)	640 bp	640 bp (technical repeat 2)	1.3kb	2.5kb	640 bp	640 bp (technical repeat 2)	1.3kb	2.5kb	640 bp	640 bp (technical repeat 2)	1.3kb	2.5kb	640 bp	640 bp (technical repeat 2)	1.3kb	2.5kb	640 bp	640 bp							640bp	Bio Rep #1
0	0	0	0	0	0	0	0	0	0	0	0	0	0	0	0	0	0	0							Time	WT	rad24	exo1 sgs1	exo1 sgs1 rad24	rad9	exo1 sgs1 rad9
1	0.317111	0.367937	0.276028	0.121215	0.439233	0.375643	0.163043	0.0415945	0.011921	0.0173022	0.00560975	0.00400641	0.153523	0.1532	0.00856133	0.00498042	0.540615	0.0642178							0	0	0	0	0	0	0
2	0.468089	0.836856	0.518765	0.448344	0.663546	0.598566	0.0864886	0.282683	0.044153	0.0519807	0.00648838	0.00417165	0.493392	0.531612	0.0369898	0.00750376	0.911146	0.0895095							1	0.342524	0.407438	0.0146116	0.153361	0.540615	0.0642178
4	0.865415	0.780962	0.684872	0.605355	0.579455	0.677345	0.581166	0.441749	0.115395	0.146125	0.0180132	0.00864623	0.589544	0.679052	0.147562	0.0258264	0.812126	0.104934							2	0.652473	0.631056	0.0480669	0.512502	0.911146	0.0895095
6	0.642967	0.677066	0.696847	0.632183	0.655609	0.633152	0.654419	0.555975	0.242723	0.288457	0.0427845	0.0144464	0.570607	0.66447	0.367872	0.153752									4	0.823189	0.6284	0.13076	0.634298	0.812126	0.104934
																									6	0.660017	0.64438	0.26559	0.617539
Biological replicate #2	WT			rad24			exo1 sgs1			exo1 sgs1 rad24			rad9	exo1 sgs1 rad9
Time (h)	640 bp	1.3kb	2.5kb	640 bp	1.3kb	2.5kb	640 bp	1.3kb	2.5kb	640 bp	1.3kb	2.5kb	640 bp	640 bp
0	0	0	0	0	0	0	0	0	0	0	0	0	0	0											640bp	Bio Rep #2
1	0.323249	0.248425	0.0922989	0.361563	0.170453	0.0430384	0.0378377	0.0165782	0.0114949	0.252115	0.0162272	0.0111997	0.441291	0.0461495											Time	WT	rad24	exo1 sgs1	exo1 sgs1 rad24	rad9	exo1 sgs1 rad9
2	0.866432	0.472461	0.390523	0.735209	0.464332	0.300399	0.0628749	0.014249	0.00963132	0.663066	0.0571616	0.0177499	0.806136	0.060302											0	0	0	0	0	0	0
4	0.854201	0.623488	0.516431	0.725496	0.654209	0.495725	0.204159	0.0239507	0.011761	0.850649	0.201077	0.0331135	0.869191	0.159416											1	0.323249	0.361563	0.0378377	0.252115	0.441291	0.0461495
6	0.81161	0.620308	0.520158	0.730569	0.620036	0.474701	0.263685	0.0322289	0.0122509	0.818279	0.328453	0.049003													2	0.866432	0.735209	0.0628749	0.663066	0.806136	0.060302
																									4	0.854201	0.725496	0.204159	0.850649	0.869191	0.159416
Biological replicate #3	WT			rad24			exo1 sgs1			exo1 sgs1 rad24			rad9	exo1 sgs1 rad9											6	0.81161	0.730569	0.263685	0.818279
Time (h)	640 bp	1.3kb	2.5kb	640 bp	1.3kb	2.5kb	640 bp	1.3kb	2.5kb	640 bp	1.3kb	2.5kb	640 bp	640 bp
0	0	0	0	0	0	0	0	0	0	0	0	0	0	0
1	0.310665	0.288725	0.103319	0.353178	0.159632	0.0432352	0.0208377	0.0116542	0.00840141	0.15573	0.0131063	0.00860195	0.387961	0.041242											640bp	Bio Rep #3
2	0.639128	0.542952	0.409914	0.660053	0.406583	0.231754	0.0446117	0.0165782	0.011031	0.487886	0.0526708	0.0116496	0.789756	0.100762											Time	WT	rad24	exo1 sgs1	exo1 sgs1 rad24	rad9	exo1 sgs1 rad9
4	0.720249	0.62541	0.533134	0.647993	0.616795	0.472901	0.123769	0.019702	0.0107115	0.655883	0.185933	0.0307185	0.947809	0.257285											0	0	0	0	0	0	0
6	0.650135	0.661387	0.531129	0.59203	0.591748	0.527981	0.201142	0.0343836	0.0137945	0.6781	0.337176	0.0674751													1	0.310665	0.353178	0.0208377	0.15573	0.387961	0.041242
																									2	0.639128	0.660053	0.0446117	0.487886	0.789756	0.100762
																									4	0.720249	0.647993	0.123769	0.655883	0.947809	0.257285
																									6	0.650135	0.59203	0.201142	0.6781
																									1.3kb	Bio Rep #1
																									Time	WT	rad24	exo1 sgs1	exo1 sgs1 rad24
																									0	0	0	0	0
																									1	0.276028	0.163043	0.00560975	0.00856133
																									2	0.518765	0.0864886	0.00648838	0.0369898
																									4	0.684872	0.581166	0.0180132	0.147562
																									6	0.696847	0.654419	0.0427845	0.367872
																									1.3kb	Bio Rep #2
																									Time	WT	rad24	exo1 sgs1	exo1 sgs1 rad24
																									0	0	0	0	0
																									1	0.248425	0.170453	0.0165782	0.0162272
																									2	0.472461	0.464332	0.014249	0.0571616
																									4	0.623488	0.654209	0.0239507	0.201077
																									6	0.620308	0.620036	0.0322289	0.328453
																									1.3kb	Bio Rep #3
																									Time	WT	rad24	exo1 sgs1	exo1 sgs1 rad24
																									0	0	0	0	0
																									1	0.288725	0.159632	0.0116542	0.0131063
																									2	0.542952	0.406583	0.0165782	0.0526708
																									4	0.62541	0.616795	0.019702	0.185933
																									6	0.661387	0.591748	0.0343836	0.337176



																									2.5kb	Bio Rep #1
																									Time	WT	rad24	exo1 sgs1	exo1 sgs1 rad24
																									0	0	0	0	0
																									1	0.121215	0.0415945	0.00400641	0.00498042
																									2	0.448344	0.282683	0.00417165	0.00750376
																									4	0.605355	0.441749	0.00864623	0.0258264
																									6	0.632183	0.555975	0.0144464	0.153752
																									2.5kb	Bio Rep #2
																									Time	WT	rad24	exo1 sgs1	exo1 sgs1 rad24
																									0	0	0	0	0
																									1	0.0922989	0.0430384	0.0114949	0.0111997
																									2	0.390523	0.300399	0.00963132	0.0177499
																									4	0.516431	0.495725	0.011761	0.0331135
																									6	0.520158	0.474701	0.0122509	0.049003
																									2.5kb	Bio Rep #3
																									Time	WT	rad24	exo1 sgs1	exo1 sgs1 rad24
																									0	0	0	0	0
																									1	0.103319	0.0432352	0.00840141	0.00860195
																									2	0.409914	0.231754	0.011031	0.0116496
																									4	0.533134	0.472901	0.0107115	0.0307185
																									6	0.531129	0.527981	0.0137945	0.0674751
[truncated: 7 more columns]

## Sheet: WT 1.3 kb & 2.5 kb
Biological Replicate 1															Biological Replicate 2															Biological Replicate 3
Time	Amplicon	Digest	Cq	Mean	SD	COV		Primer Efficiencies							Time	Amplicon	Digest	Cq	Mean	SD	COV		Primer Efficiencies							Time	Amplicon	Digest	Cq	Mean	SD	COV		Primer Efficiencies
0	ADH1	none	18.1161	17.7563	0.231333	0.0130282		ADH1	1.98						0	ADH1	none	18.479	18.2663	0.229796	0.0125804		ADH1	1.98						0	ADH1	none	20.3288	20.051	0.160664	0.00801273		ADH1	1.98
0	ADH1	none	17.8582					RsaIcs +1.3kb	2.02						0	ADH1	none	18.4605					RsaIcs +1.3kb	2.02						0	ADH1	none	20.0414					RsaIcs +1.3kb	2.02
0	ADH1	none	17.6545					RsaIcs +2.5kb	2		Calculate HOcs Cut Fraction				0	ADH1	none	18.072					RsaIcs +2.5kb	2		Calculate HOcs Cut Fraction				0	ADH1	none	20.0606					RsaIcs +2.5kb	2		Calculate HOcs Cut Fraction
0	1.3kb	none	19.2242	19.2916	0.0616897	0.00319775									0	1.3kb	none	19.8335	19.8914	0.0670792	0.00337228									0	1.3kb	none	21.7647	21.7226	0.0594798	0.00273815
0	1.3kb	none	19.3055					Calculate resected fraction			Cut	HOcs			0	1.3kb	none	19.9649					Calculate resected fraction			Cut	HOcs			0	1.3kb	none	21.6806					Calculate resected fraction			Cut	HOcs
0	1.3kb	none	19.3452								Ref	ADH1			0	1.3kb	none	19.8757								Ref	ADH1			0	1.3kb	none									Ref	ADH1
0	2.5kb	none	18.6405	18.771	0.118095	0.00629133		Cut	1.3kb						0	2.5kb	none	19.0099	19.1911	0.160146	0.00834481		Cut	1.3kb						0	2.5kb	none	20.1666	21.0734	0.868938	0.0412338		Cut	1.3kb
0	2.5kb	none	18.8705					Ref	ADH1		Time	Fraction			0	2.5kb	none	19.3137					Ref	ADH1		Time	Fraction			0	2.5kb	none	21.155					Ref	ADH1		Time	Fraction
0	2.5kb	none	18.8021								0	0			0	2.5kb	none	19.2497								0	0			0	2.5kb	none	21.8987								0	0
0	ADH1	RsaI	18.0572	18.0569	0.0391725	0.00216939		Time	Fraction		1	0.977827			0	ADH1	RsaI	18.2946	18.3472	0.0464712	0.00253287		Time	Fraction		1	0.977827			0	ADH1	RsaI	19.9076	20.0014	0.0864788	0.00432364		Time	Fraction		1	0.977827
0	ADH1	RsaI	18.0176					0	0		2	0.986752			0	ADH1	RsaI	18.3643					0	0		2	0.986752			0	ADH1	RsaI	20.0186					0	0		2	0.986752
0	ADH1	RsaI	18.0959					1	0.276028		4	0.989706			0	ADH1	RsaI	18.3828					1	0.248425		4	0.989706			0	ADH1	RsaI	20.078					1	0.288725		4	0.989706
0	1.3kb	RsaI	26.637	26.6848	0.167986	0.00629519		2	0.518765		6	0.991452			0	1.3kb	RsaI	26.2238	26.28	0.17664	0.00672145		2	0.472461		6	0.991452			0	1.3kb	RsaI	27.737	27.8673	0.161303	0.00578825		2	0.542952		6	0.991452
0	1.3kb	RsaI	26.8715					4	0.684872						0	1.3kb	RsaI	26.478					4	0.623488						0	1.3kb	RsaI	28.0477					4	0.62541
0	1.3kb	RsaI	26.5458					6	0.696847						0	1.3kb	RsaI	26.1383					6	0.620308						0	1.3kb	RsaI	27.8172					6	0.661387
0	2.5kb	RsaI	26.5236	26.6245	0.120402	0.00452223									0	2.5kb	RsaI	26.1824	26.2053	0.0475087	0.00181294									0	2.5kb	RsaI	27.4658	27.5286	0.067143	0.00243902
0	2.5kb	RsaI	26.7578					Calculate resected fraction							0	2.5kb	RsaI	26.1737					Calculate resected fraction							0	2.5kb	RsaI	27.5994					Calculate resected fraction
0	2.5kb	RsaI	26.5921												0	2.5kb	RsaI	26.26												0	2.5kb	RsaI	27.5208
1	ADH1	none	18.3136	18.2993	0.0308514	0.00168593		Cut	2.5kb						1	ADH1	none	19.4194	19.4591	0.0390254	0.00200551		Cut	2.5kb						1	ADH1	none	20.0649	19.9827	0.0947541	0.0047418		Cut	2.5kb
1	ADH1	none	18.2639					Ref	ADH1						1	ADH1	none	19.4974					Ref	ADH1						1	ADH1	none	19.8791					Ref	ADH1
1	ADH1	none	18.3204												1	ADH1	none	19.4605												1	ADH1	none	20.0042
1	1.3kb	none	19.9272	19.8306	0.089246	0.00450042		Time	Fraction						1	1.3kb	none	20.7135	20.7558	0.0443673	0.00213759		Time	Fraction						1	1.3kb	none	21.4947	21.4466	0.145748	0.00679585		Time	Fraction
1	1.3kb	none	19.7513					0	0						1	1.3kb	none	20.7518					0	0						1	1.3kb	none	21.5622					0	0
1	1.3kb	none	19.8132					1	0.121215						1	1.3kb	none	20.802					1	0.0922989						1	1.3kb	none	21.2828					1	0.103319
1	2.5kb	none	19.0229	19.0085	0.026148	0.0013756		2	0.448344						1	2.5kb	none	19.8908	19.8834	0.0483956	0.00243397		2	0.390523						1	2.5kb	none	20.2557	20.3093	0.0484018	0.00238324		2	0.409914
1	2.5kb	none	19.0242					4	0.605355						1	2.5kb	none	19.9276					4	0.516431						1	2.5kb	none	20.3223					4	0.533134
1	2.5kb	none	18.9783					6	0.632183						1	2.5kb	none	19.8317					6	0.520158						1	2.5kb	none	20.3498					6	0.531129
1	ADH1	RsaI	18.0336	18.2184	0.196417	0.0107812									1	ADH1	RsaI	19.3202	19.3601	0.0371235	0.00191753									1	ADH1	RsaI	19.8707	19.8419	0.0249824	0.00125907
1	ADH1	RsaI	18.4247												1	ADH1	RsaI	19.3664												1	ADH1	RsaI	19.826
1	ADH1	RsaI	18.1969												1	ADH1	RsaI	19.3936												1	ADH1	RsaI	19.829
1	1.3kb	RsaI	22.1198	22.3203	0.222943	0.00998833									1	1.3kb	RsaI	23.3475	23.401	0.0562048	0.00240181									1	1.3kb	RsaI	23.6897	23.8034	0.110232	0.00463092
1	1.3kb	RsaI	22.5604												1	1.3kb	RsaI	23.3959												1	1.3kb	RsaI	23.8107
1	1.3kb	RsaI	22.2809												1	1.3kb	RsaI	23.4595												1	1.3kb	RsaI	23.9097
1	2.5kb	RsaI	22.6203	22.8485	0.211107	0.00923942									1	2.5kb	RsaI	24.151	24.1212	0.029297	0.00121457									1	2.5kb	RsaI	24.2729	24.3346	0.0728522	0.00299376
1	2.5kb	RsaI	22.8881												1	2.5kb	RsaI	24.1202												1	2.5kb	RsaI	24.316
1	2.5kb	RsaI	23.0369												1	2.5kb	RsaI	24.0924												1	2.5kb	RsaI	24.415
2	ADH1	none	18.2163	18.2403	0.0227799	0.00124887									2	ADH1	none	19.9924	20.0484	0.0496368	0.00247585									2	ADH1	none	20.65	20.3925	0.226368	0.0111006
2	ADH1	none	18.2431												2	ADH1	none	20.0656												2	ADH1	none	20.2249
2	ADH1	none	18.2616												2	ADH1	none	20.0871												2	ADH1	none	20.3025
2	1.3kb	none	20.661	20.6429	0.143266	0.0069402									2	1.3kb	none	21.7792	21.7922	0.0160848	0.000738101									2	1.3kb	none	22.4974	22.3938	0.153745	0.00686552
2	1.3kb	none	20.4915												2	1.3kb	none	21.7871												2	1.3kb	none	22.467
2	1.3kb	none	20.7763												2	1.3kb	none	21.8102												2	1.3kb	none	22.2172
2	2.5kb	none	20.0815	19.9687	0.0976947	0.00489239									2	2.5kb	none	20.9606	21.0867	0.122733	0.00582039									2	2.5kb	none	21.6164	21.6045	0.108471	0.00502075
2	2.5kb	none	19.9138												2	2.5kb	none	21.0935												2	2.5kb	none	21.7066
2	2.5kb	none	19.9108												2	2.5kb	none	21.2058												2	2.5kb	none	21.4906
2	ADH1	RsaI	17.8292	18.0065	0.158361	0.00879469									2	ADH1	RsaI	19.7717	19.8553	0.0844227	0.00425189									2	ADH1	RsaI	20.0854	20.0674	0.0264158	0.00131636
2	ADH1	RsaI	18.134												2	ADH1	RsaI	19.8538												2	ADH1	RsaI	20.037
2	ADH1	RsaI	18.0562												2	ADH1	RsaI	19.9405												2	ADH1	RsaI	20.0796
2	1.3kb	RsaI	21.6457	21.8823	0.20654	0.00943871									2	1.3kb	RsaI	23.194	23.2487	0.0553009	0.00237867									2	1.3kb	RsaI	23.3827	23.4559	0.0880955	0.0037558
2	1.3kb	RsaI	22.0266												2	1.3kb	RsaI	23.2474												2	1.3kb	RsaI	23.4312
2	1.3kb	RsaI	21.9746												2	1.3kb	RsaI	23.3046												2	1.3kb	RsaI	23.5537
2	2.5kb	RsaI	21.4656	21.5045	0.0625249	0.00290752									2	2.5kb	RsaI	22.8646	22.9156	0.0871465	0.00380294									2	2.5kb	RsaI	23.1521	23.2156	0.0862119	0.00371353
2	2.5kb	RsaI	21.5766												2	2.5kb	RsaI	23.0162												2	2.5kb	RsaI	23.181
2	2.5kb	RsaI	21.4714												2	2.5kb	RsaI	22.8659												2	2.5kb	RsaI	23.3137
4	ADH1	none	18.1524	18.0614	0.0987439	0.00546712									4	ADH1	none	20.0372	19.9693	0.0630947	0.00315959									4	ADH1	none	20.562	20.443	0.103203	0.00504833
4	ADH1	none	18.0754												4	ADH1	none	19.9581												4	ADH1	none	20.3887
4	ADH1	none	17.9564												4	ADH1	none	19.9125												4	ADH1	none	20.3782
4	1.3kb	none	20.552	20.6424	0.0898096	0.00435073									4	1.3kb	none	21.6919	21.7289	0.0447491	0.00205943									4	1.3kb	none	22.4268	22.5028	0.0832066	0.00369761
4	1.3kb	none	20.6436												4	1.3kb	none	21.7161												4	1.3kb	none	22.5917
4	1.3kb	none	20.7316												4	1.3kb	none	21.7786												4	1.3kb	none	22.4898
4	2.5kb	none	20.0518	19.998	0.117679	0.00588455									4	2.5kb	none	20.893	20.9577	0.111274	0.00530945									4	2.5kb	none	21.8418	21.8505	0.104247	0.0047709
4	2.5kb	none	20.0791												4	2.5kb	none	21.0862												4	2.5kb	none	21.9588
4	2.5kb	none	19.863												4	2.5kb	none	20.8939												4	2.5kb	none	21.7509
4	ADH1	RsaI	17.5289	17.7264	0.192479	0.0108583									4	ADH1	RsaI	19.5713	19.7511	0.155905	0.00789349									4	ADH1	RsaI	20.1713	20.1343	0.0488835	0.00242788
4	ADH1	RsaI	17.7369												4	ADH1	RsaI	19.8337												4	ADH1	RsaI	20.0789
4	ADH1	RsaI	17.9134												4	ADH1	RsaI	19.8483												4	ADH1	RsaI	20.1526
4	1.3kb	RsaI	21.1687	21.2225	0.0593676	0.0027974									4	1.3kb	RsaI	22.568	22.6219	0.110113	0.00486753									4	1.3kb	RsaI	23.2643	23.3015	0.0323952	0.00139026
4	1.3kb	RsaI	21.2126												4	1.3kb	RsaI	22.7486												4	1.3kb	RsaI	23.3162
4	1.3kb	RsaI	21.2862												4	1.3kb	RsaI	22.5492												4	1.3kb	RsaI	23.3239
4	2.5kb	RsaI	20.801	20.8504	0.0826707	0.00396495									4	2.5kb	RsaI	22.1539	22.245	0.0789915	0.00355098									4	2.5kb	RsaI	22.819	22.9861	0.145514	0.00633053
4	2.5kb	RsaI	20.9458												4	2.5kb	RsaI	22.2864												4	2.5kb	RsaI	23.0545
4	2.5kb	RsaI	20.8044												4	2.5kb	RsaI	22.2947												4	2.5kb	RsaI	23.0848
6	ADH1	none	18.163	17.9877	0.164736	0.00915828									6	ADH1	none	20.0262	19.9663	0.0757329	0.00379304									6	ADH1	none	20.4109	20.4127	0.150096	0.00735305
6	ADH1	none	17.964												6	ADH1	none	19.9914												6	ADH1	none	20.5637
6	ADH1	none	17.8361												6	ADH1	none	19.8812												6	ADH1	none	20.2635
6	1.3kb	none	20.7741	20.7036	0.0718058	0.00346827									6	1.3kb	none	21.8573	21.8439	0.0666037	0.00304907									6	1.3kb	none	22.3031	22.4563	0.282202	0.0125668
6	1.3kb	none	20.6306												6	1.3kb	none	21.9028												6	1.3kb	none	22.7819
6	1.3kb	none	20.7062												6	1.3kb	none	21.7716												6	1.3kb	none	22.2838
6	2.5kb	none	20.0215	19.9989	0.161648	0.00808285									6	2.5kb	none	21.1256	21.1061	0.129603	0.00614055									6	2.5kb	none	21.6493	21.6799	0.0423105	0.0019516
6	2.5kb	none	20.148												6	2.5kb	none	21.2248												6	2.5kb	none	21.7282
6	2.5kb	none	19.8271												6	2.5kb	none	20.9678												6	2.5kb	none	21.6621
6	ADH1	RsaI	17.6084	17.7232	0.111892	0.00631332									6	ADH1	RsaI	19.5655	19.7113	0.128908	0.00653977									6	ADH1	RsaI	20.0879	20.1021	0.0202566	0.00100768
6	ADH1	RsaI	17.7291												6	ADH1	RsaI	19.7583												6	ADH1	RsaI	20.1253
6	ADH1	RsaI	17.832												6	ADH1	RsaI	19.8102												6	ADH1	RsaI	20.0932
6	1.3kb	RsaI	21.2454	21.3182	0.0885054	0.00415165									6	1.3kb	RsaI	22.6905	22.7155	0.065287	0.00287412									6	1.3kb	RsaI	23.0358	23.139	0.109085	0.00471434
6	1.3kb	RsaI	21.2923												6	1.3kb	RsaI	22.7896												6	1.3kb	RsaI	23.2532
6	1.3kb	RsaI	21.4167												6	1.3kb	RsaI	22.6664												6	1.3kb	RsaI	23.1281
6	2.5kb	RsaI	20.7452	20.8335	0.160584	0.00770796									6	2.5kb	RsaI	22.2983	22.3465	0.043637	0.00195274									6	2.5kb	RsaI	22.8853	22.8245	0.156856	0.00687226
6	2.5kb	RsaI	20.7364												6	2.5kb	RsaI	22.3581												6	2.5kb	RsaI	22.6463
6	2.5kb	RsaI	21.0189												6	2.5kb	RsaI	22.3832												6	2.5kb	RsaI	22.9418

## Sheet: WT 640bp
Biological Replicate 1												Biological Replicate 1, Technical Replicate 2												Biological Replicate 2												Biological Replicate 3
Time	Amplicon	Digest	Cq	Mean	SD	COV		Primer Efficiencies				Time	Amplicon	Digest	Cq	Mean	SD	COV		Primer Efficiencies				Time	Amplicon	Digest	Cq	Mean	SD	COV		Primer Efficiencies				Time	Amplicon	Digest	Cq	Mean	SD	COV		Primer Efficiencies
0	HOcs	none		23.1563	3.90825	0.168777		HOcs	2.01			0	HOcs	none	20.1686	20.1729	0.0110947	0.000549981		HOcs	2.01			0	HOcs	none	21.9139	21.7924	0.013396	0.000614708		HOcs	2.01			0	HOcs	none	21.4486	21.5161	0.00476941	0.000221667		HOcs	2.01
0	HOcs	none	20.3927					ADH1	1.98			0	HOcs	none	20.1807					ADH1	1.98			0	HOcs	none	21.7829					ADH1	1.98			0	HOcs	none	21.5127					ADH1	1.98
0	HOcs	none	25.9198					640bp	1.96			0	HOcs	none	20.1651					640bp	1.96			0	HOcs	none	21.8019					640bp	1.96			0	HOcs	none	21.5195					640bp	1.96
0	ADH1	none		20.7593	0.840186	0.0404727						0	ADH1	none	18.532	18.6142	0.0333712	0.00179278						0	ADH1	none	19.8078	19.9089	0.0850888	0.0042739						0	ADH1	none	19.7542	19.869	7.83794e-05	3.94482e-06
0	ADH1	none	20.1652					Calculate HOcs Cut Fraction				0	ADH1	none	18.6789					Calculate HOcs Cut Fraction				0	ADH1	none	20.0197					Calculate HOcs Cut Fraction				0	ADH1	none	19.9263					Calculate HOcs Cut Fraction
0	ADH1	none	21.3534									0	ADH1	none	18.6317									0	ADH1	none	19.8993									0	ADH1	none	19.9264
0	640bp	none	19.6347	19.7784	0.121048	0.00612024		Cut	HOcs			0	640bp	none	19.578	19.5517	0.113714	0.00581608		Cut	HOcs			0	640bp	none	20.8273	20.9457	0.107418	0.00512838		Cut	HOcs			0	640bp	none	20.8681	20.802	0.0894024	0.00429777		Cut	HOcs
0	640bp	none	19.9358					Ref	ADH1			0	640bp	none	19.4582					Ref	ADH1			0	640bp	none	20.929					Ref	ADH1			0	640bp	none	20.7058					Ref	ADH1
0	640bp	none	19.7646									0	640bp	none	19.619									0	640bp	none	21.0809									0	640bp	none	20.8322
0	ADH1	RsaI	19.4999	19.2723	0.321903	0.0167029		Time	Fraction			0	ADH1	RsaI	18.5092	18.5207	0.0353129	0.00190667		Time	Fraction			0	ADH1	RsaI	19.747	19.7525	0.0202435	0.00102486		Time	Fraction			0	ADH1	RsaI	19.6906	19.7691	0.0738688	0.00373657		Time	Fraction
0	ADH1	RsaI	19.0447					0	0			0	ADH1	RsaI	18.5591					0	0			0	ADH1	RsaI	19.7756					0	0			0	ADH1	RsaI	19.795					0	0
0	ADH1	RsaI						1	0.961168			0	ADH1	RsaI	18.4939					1	0.977827			0	ADH1	RsaI	19.7348					1	0.967889			0	ADH1	RsaI	19.8218					1	0.97035
0	640bp	RsaI	27.7602	27.9477	0.183939	0.00658155		2	0.983271			0	640bp	RsaI	27.4399	27.2509	0.032757	0.00120205		2	0.986752			0	640bp	RsaI	27.0816	27.1756	0.0555855	0.00204542		2	0.969714			0	640bp	RsaI	26.8283	26.9983	0.025788	0.00095517		2	0.973875
0	640bp	RsaI	28.1715					4	0.996633			0	640bp	RsaI	27.1332					4	0.989706			0	640bp	RsaI	27.1833					4	0.970336			0	640bp	RsaI	27.1015					4	0.975596
0	640bp	RsaI	27.9113					6	0.99041			0	640bp	RsaI	27.1795					6	0.991452			0	640bp	RsaI	27.262					6	0.979326			0	640bp	RsaI	27.0651					6	0.980276
1	HOcs	none		25.8545	0.00920554	0.000356052						1	HOcs	none	25.6425	25.4139	0.133424	0.00525006						1	HOcs	none	27.1965	27.0451	0.0805555	0.00297857						1	HOcs	none	26.7308	26.6598	0.0681931	0.0025579
1	HOcs	none	25.848									1	HOcs	none	25.5082									1	HOcs	none	26.9881									1	HOcs	none	26.576
1	HOcs	none	25.861									1	HOcs	none	25.3196									1	HOcs	none	27.102									1	HOcs	none	26.6725
1	ADH1	none	18.9279	18.7614	0.235534	0.0125542						1	ADH1	none	18.4559	18.3947	0.0476552	0.0025907						1	ADH1	none	20.4161	20.2435	0.159044	0.00785654						1	ADH1	none	20.0313	19.9753	0.0472059	0.00236321
1	ADH1	none	18.5948					Calculate Resected Fraction				1	ADH1	none	18.3885					Calculate Resected Fraction				1	ADH1	none	20.1911					Calculate Resected Fraction				1	ADH1	none	19.9645					Calculate Resected Fraction
1	ADH1	none										1	ADH1	none	18.3396									1	ADH1	none	20.1232									1	ADH1	none	19.9302
1	640bp	none	19.7756	19.7351	0.0485776	0.00246148		Cut	640bp			1	640bp	none	19.4699	19.6193	0.00647338	0.000329949		Cut	640bp			1	640bp	none		20.8367	0.541035	0.0259655		Cut	640bp			1	640bp	none	20.8365	20.7675	0.11405	0.00549176		Cut	640bp
1	640bp	none	19.7492					Ref	ADH1			1	640bp	none	19.6895					Ref	ADH1			1	640bp	none	20.4541					Ref	ADH1			1	640bp	none	20.6524					Ref	ADH1
1	640bp	none	19.6805									1	640bp	none	19.6986									1	640bp	none	21.2192									1	640bp	none	20.8137
1	ADH1	RsaI	18.7732	18.7265	0.111943	0.00597777		Time	Fraction			1	ADH1	RsaI	18.3821	18.4028	0.0102795	0.000558581		Time	Fraction			1	ADH1	RsaI	20.0149	20.1918	0.104703	0.00518542		Time	Fraction			1	ADH1	RsaI	19.7374	19.9479	0.0257861	0.00129267		Time	Fraction
1	ADH1	RsaI	18.7822					0	0			1	ADH1	RsaI	18.4059					0	0			1	ADH1	RsaI	20.3542					0	0			1	ADH1	RsaI	20.0349					0	0
1	ADH1	RsaI	18.6239					1	0.317111			1	ADH1	RsaI	18.4204					1	0.367937			1	ADH1	RsaI	20.2062					1	0.323249			1	ADH1	RsaI	20.0714					1	0.310665
1	640bp	RsaI	22.2424	22.2495	0.255345	0.0114764		2	0.468089			1	640bp	RsaI	21.6719	21.882	0.030279	0.00138374		2	0.836856			1	640bp	RsaI	23.46	23.2881	0.101695	0.00436684		2	0.866432			1	640bp	RsaI	23.2249	23.3089	0.114491	0.00491192		2	0.639128
1	640bp	RsaI	22.4336					4	0.865415			1	640bp	RsaI	21.9657					4	0.780962			1	640bp	RsaI	23.1302					4	0.854201			1	640bp	RsaI	23.4318					4	0.720249
1	640bp	RsaI	22.0725					6	0.642967			1	640bp	RsaI	22.0085					6	0.677066			1	640bp	RsaI	23.2741					6	0.81161			1	640bp	RsaI	23.2699					6	0.650135
2	HOcs	none	30.4338	27.6659	0.0696035	0.00251585						2	HOcs	none	26.1737	26.1378	0.0293373	0.00112241						2	HOcs	none	27.1065	27.1325	0.0886762	0.00326827						2	HOcs	none	27.3206	27.2337	0.0681881	0.00250381
2	HOcs	none	26.2328									2	HOcs	none	26.1406									2	HOcs	none	27.0828									2	HOcs	none	27.1421
2	HOcs	none	26.3312									2	HOcs	none	26.0991									2	HOcs	none	27.2082									2	HOcs	none	27.2385
2	ADH1	none	18.9454	19.3799	0.429413	0.0221576						2	ADH1	none	18.3636	18.3806	0.13716	0.00746223						2	ADH1	none	20.2762	20.2472	0.0626824	0.00309586						2	ADH1	none	20.4201	20.3766	0.0661354	0.00324565
2	ADH1	none	19.2935									2	ADH1	none	18.486									2	ADH1	none	20.277									2	ADH1	none	20.4017
2	ADH1	none	19.9008									2	ADH1	none	18.2921									2	ADH1	none	20.1883									2	ADH1	none	20.3081
2	640bp	none	20.5592	20.6642	0.0837501	0.0040529						2	640bp	none	20.5035	20.4999	0.0201366	0.000982281						2	640bp	none	21.86	21.8156	0.0198545	0.000910105						2	640bp	none	22.096	22.0285	0.0847988	0.00384951
2	640bp	none	20.6575									2	640bp	none	20.4838									2	640bp	none	21.8075									2	640bp	none	21.9347
2	640bp	none	20.776									2	640bp	none	20.5123									2	640bp	none	21.7794									2	640bp	none	22.0546
2	ADH1	RsaI	18.7528	18.8563	0.0865659	0.00459082						2	ADH1	RsaI	18.5027	18.5127	0.0222817	0.00120359						2	ADH1	RsaI	20.16	20.2422	0.0725854	0.00358585						2	ADH1	RsaI	20.2757	20.3854	0.013542	0.000664297
2	ADH1	RsaI	18.8468									2	ADH1	RsaI	18.5019									2	ADH1	RsaI	20.3346									2	ADH1	RsaI	20.4307
2	ADH1	RsaI	18.9693									2	ADH1	RsaI	18.5334									2	ADH1	RsaI	20.232									2	ADH1	RsaI	20.4498
2	640bp	RsaI	21.6784	21.9272	0.125941	0.00574358						2	640bp	RsaI	21.0487	21.1571	0.125908	0.00595106						2	640bp	RsaI	22.1797	22.2896	0.085361	0.00382963						2	640bp	RsaI	23.1721	23.2179	0.00836406	0.000360242
2	640bp	RsaI	21.9626									2	640bp	RsaI	21.1223									2	640bp	RsaI	22.405									2	640bp	RsaI	23.2349
2	640bp	RsaI	22.1407									2	640bp	RsaI	21.3004									2	640bp	RsaI	22.2842									2	640bp	RsaI	23.2467
4	HOcs	none	29.5814	29.0286	0.781743	0.0269301						4	HOcs	none	26.3105	26.3156	0.0123577	0.000469596						4	HOcs	none	27.0118	27.0142	0.0254838	0.00094335						4	HOcs	none	27.3233	27.3069	0.112893	0.00413425
4	HOcs	none	28.4758									4	HOcs	none	26.3279									4	HOcs	none	26.9757									4	HOcs	none	27.1636
4	HOcs	none										4	HOcs	none	26.3085									4	HOcs	none	27.0551									4	HOcs	none	27.4338
4	ADH1	none	18.4386	18.4256	0.151847	0.00824105						4	ADH1	none	18.1305	18.1929	0.102011	0.00560718						4	ADH1	none	20.0511	20.0959	0.0315163	0.0015683						4	ADH1	none	20.2756	20.3517	0.118989	0.00584663
4	ADH1	none	18.3118									4	ADH1	none	18.2963									4	ADH1	none	20.1405									4	ADH1	none	20.4738
4	ADH1	none	18.5266									4	ADH1	none	18.152									4	ADH1	none	20.096									4	ADH1	none	20.3055
4	640bp	none	20.7996	20.6929	0.0646408	0.00312382						4	640bp	none	20.6335	20.5895	0.0596476	0.00289699						4	640bp	none	21.7582	21.7227	0.0556694	0.00256273						4	640bp	none	22.1111	22.0605	0.0627983	0.00284664
4	640bp	none	20.6852									4	640bp	none	20.5254									4	640bp	none	21.6656									4	640bp	none	21.9908
4	640bp	none	20.5938									4	640bp	none	20.6097									4	640bp	none	21.7443									4	640bp	none	22.0796
4	ADH1	RsaI	19.3074	18.6492	0.0698571	0.00374586						4	ADH1	RsaI	18.4296	18.3224	0.00491839	0.000268436						4	ADH1	RsaI	20.0376	20.026	0.0193867	0.000968079						4	ADH1	RsaI	20.4716	20.5479	0.0408339	0.00198725
4	ADH1	RsaI	18.2706									4	ADH1	RsaI	18.2723									4	ADH1	RsaI	20.0065									4	ADH1	RsaI	20.5572
4	ADH1	RsaI	18.3694									4	ADH1	RsaI	18.2654									4	ADH1	RsaI	20.0339									4	ADH1	RsaI	20.6149
4	640bp	RsaI	21.3431	21.331	0.0698992	0.00327688						4	640bp	RsaI	21.4459	21.4078	0.231951	0.0108349						4	640bp	RsaI	22.1758	22.1654	0.0694678	0.00313406						4	640bp	RsaI	23.1285	23.1709	0.0780454	0.00336826
4	640bp	RsaI	21.2755									4	640bp	RsaI	21.2248									4	640bp	RsaI	22.2094									4	640bp	RsaI	23.2472
4	640bp	RsaI	21.3744									4	640bp	RsaI	21.5528									4	640bp	RsaI	22.1111									4	640bp	RsaI	23.1369
6	HOcs	none	28.8291	27.4158	0.24855	0.00906594						6	HOcs	none	26.3402	26.3684	0.131682	0.00499395						6	HOcs	none	27.3471	27.3096	0.218551	0.00800274						6	HOcs	none	27.3949	27.5186	0.0764779	0.00277913
6	HOcs	none	26.885									6	HOcs	none	26.4756									6	HOcs	none	27.4454									6	HOcs	none	27.5264
6	HOcs	none	26.5335									6	HOcs	none	26.2894									6	HOcs	none	27.1363									6	HOcs	none	27.6346
6	ADH1	none	18.5078	18.3098	0.28007	0.0152962						6	ADH1	none	17.932	17.9748	0.0533242	0.00296661						6	ADH1	none	19.9168	19.8692	0.0485241	0.00244218						6	ADH1	none	20.3311	20.2564	0.0668348	0.00329945
6	ADH1	none										6	ADH1	none	18.0345									6	ADH1	none	19.871									6	ADH1	none	20.2358
6	ADH1	none	18.1117									6	ADH1	none	17.958									6	ADH1	none	19.8198									6	ADH1	none	20.2022
6	640bp	none	20.438	20.5329	0.116107	0.00565469						6	640bp	none	20.3808	20.3656	0.144795	0.00710979						6	640bp	none	21.6154	21.5627	0.177382	0.00822636						6	640bp	none	21.7143	21.6916	0.145436	0.00670469
6	640bp	none	20.6624									6	640bp	none	20.2556									6	640bp	none	21.4109									6	640bp	none	21.5775
6	640bp	none	20.4982									6	640bp	none	20.4604									6	640bp	none	21.6617									6	640bp	none	21.7831
6	ADH1	RsaI	18.2036	18.2567	0.125907	0.00689651						6	ADH1	RsaI	17.74	17.8871	0.0162364	0.000907713						6	ADH1	RsaI	19.6704	19.771	0.0554214	0.00280317						6	ADH1	RsaI	20.0843	20.2075	0.0775568	0.00383802
6	ADH1	RsaI	18.1942									6	ADH1	RsaI	17.9722									6	ADH1	RsaI	19.8605									6	ADH1	RsaI	20.324
6	ADH1	RsaI	18.3722									6	ADH1	RsaI	17.9492									6	ADH1	RsaI	19.7821									6	ADH1	RsaI	20.2143
6	640bp	RsaI		21.61	0.838888	0.0388194						6	640bp	RsaI	21.3108	21.2912	0.0371647	0.00174555						6	640bp	RsaI	22.0564	22.0815	0.0662329	0.00299947						6	640bp	RsaI	22.8028	22.7714	0.0601061	0.00263955
6	640bp	RsaI	22.2032									6	640bp	RsaI	21.2551									6	640bp	RsaI	22.1409									6	640bp	RsaI	22.7981
6	640bp	RsaI	21.0168									6	640bp	RsaI	21.3076									6	640bp	RsaI	22.0473									6	640bp	RsaI	22.7131

## Sheet: exo1 sgs1 1.3 kb & 2.5 kb
Biological Replicate 1															Biological Replicate 2															Biological Replicate 3
Time	Amplicon	Digest	Cq	Mean	SD	COV		Primer Efficiencies							Time	Amplicon	Digest	Cq	Mean	SD	COV		Primer Efficiencies							Time	Amplicon	Digest	Cq	Mean	SD	COV		Primer Efficiencies
0	ADH1	none	19.1057	19.1473	0.075439	0.00393993		ADH1	1.98						0	ADH1	none	18.8929	18.7	0.189157	0.0101154		ADH1	1.98						0	ADH1	none	21.3169	21.2601	0.102521	0.00482222		ADH1	1.98
0	ADH1	none	19.1018					RsaIcs +1.3kb	2.02						0	ADH1	none	18.6922					RsaIcs +1.3kb	2.02						0	ADH1	none	21.1417					RsaIcs +1.3kb	2.02
0	ADH1	none	19.2344					RsaIcs +2.5kb	2		Calculate HOcs Cut Fraction				0	ADH1	none	18.5148					RsaIcs +2.5kb	2		Calculate HOcs Cut Fraction				0	ADH1	none	21.3216					RsaIcs +2.5kb	2		Calculate HOcs Cut Fraction
0	1.3kb	none	20.5111	20.5153	0.0413671	0.0020164									0	1.3kb	none	20.1465	20.2238	0.113356	0.00560505									0	1.3kb	none	22.998	22.9345	0.0586412	0.00255689
0	1.3kb	none	20.5586					Calculate resected fraction			Cut	HOcs			0	1.3kb	none	20.354					Calculate resected fraction			Cut	HOcs			0	1.3kb	none	22.9232					Calculate resected fraction			Cut	HOcs
0	1.3kb	none	20.4762								Ref	ADH1			0	1.3kb	none	20.171								Ref	ADH1			0	1.3kb	none	22.8824								Ref	ADH1
0	2.5kb	none	19.7152	19.829	0.119775	0.00604036		Cut	1.3kb						0	2.5kb	none	19.2337	19.3818	0.156531	0.00807621		Cut	1.3kb						0	2.5kb	none	22.0768	22.0459	0.0272591	0.00123647		Cut	1.3kb
0	2.5kb	none	19.818					Ref	ADH1		Time	Fraction			0	2.5kb	none	19.3661					Ref	ADH1		Time	Fraction			0	2.5kb	none	22.0253					Ref	ADH1		Time	Fraction
0	2.5kb	none	19.954								0	0			0	2.5kb	none	19.5456								0	0			0	2.5kb	none	22.0355								0	0
0	ADH1	RsaI	18.9669	18.877	0.0816234	0.00432395		Time	Fraction		1	0.785856			0	ADH1	RsaI	18.2813	18.3259	0.0690739	0.00376921		Time	Fraction		1	0.785856			0	ADH1	RsaI	21.0558	20.9217	0.15247	0.00728766		Time	Fraction		1	0.785856
0	ADH1	RsaI	18.8568					0	0		2	0.859517			0	ADH1	RsaI	18.2909					0	0		2	0.859517			0	ADH1	RsaI	20.7558					0	0		2	0.859517
0	ADH1	RsaI	18.8075					1	0.00560975		4	0.910542			0	ADH1	RsaI	18.4054					1	0.0165782		4	0.910542			0	ADH1	RsaI	20.9535					1	0.0116542		4	0.910542
0	1.3kb	RsaI	27.1164	27.1044	0.0314231	0.00115934		2	0.00648838		6	0.916039			0	1.3kb	RsaI	25.1398	25.1096	0.0262188	0.00104418		2	0.014249		6	0.916039			0	1.3kb	RsaI	28.4566	28.3909	0.179355	0.00631735		2	0.0165782		6	0.916039
0	1.3kb	RsaI	27.1281					4	0.0180132						0	1.3kb	RsaI	25.0958					4	0.0239507						0	1.3kb	RsaI	28.1879					4	0.019702
0	1.3kb	RsaI	27.0688					6	0.0427845						0	1.3kb	RsaI	25.0931					6	0.0322289						0	1.3kb	RsaI	28.5281					6	0.0343836
0	2.5kb	RsaI	26.6533	26.8644	0.192279	0.00715738									0	2.5kb	RsaI	24.6172	24.687	0.300574	0.0121754									0	2.5kb	RsaI	27.7394	28.0284	0.255953	0.00913194
0	2.5kb	RsaI	26.9107					Calculate resected fraction							0	2.5kb	RsaI	25.0163					Calculate resected fraction							0	2.5kb	RsaI	28.1193					Calculate resected fraction
0	2.5kb	RsaI	27.0294												0	2.5kb	RsaI	24.4274												0	2.5kb	RsaI	28.2264
1	ADH1	none	19.0137	19.0594	0.0426309	0.00223673		Cut	2.5kb						1	ADH1	none	19.6965	19.7646	0.0619758	0.00313569		Cut	2.5kb						1	ADH1	none	21.0727	21.2405	0.349044	0.0164329		Cut	2.5kb
1	ADH1	none	19.0981					Ref	ADH1						1	ADH1	none	19.8177					Ref	ADH1						1	ADH1	none	21.6418					Ref	ADH1
1	ADH1	none	19.0665												1	ADH1	none	19.7796												1	ADH1	none	21.0071
1	1.3kb	none	20.3572	20.2741	0.0748368	0.00369125		Time	Fraction						1	1.3kb	none	21.1645	21.0809	0.0733805	0.0034809		Time	Fraction						1	1.3kb	none	22.3955	22.2978	0.0937507	0.00420448		Time	Fraction
1	1.3kb	none	20.2529					0	0						1	1.3kb	none	21.0515					0	0						1	1.3kb	none	22.2894					0	0
1	1.3kb	none	20.2122					1	0.00400641						1	1.3kb	none	21.0269					1	0.0114949						1	1.3kb	none	22.2086					1	0.00840141
1	2.5kb	none	19.586	19.6111	0.0354081	0.00180551		2	0.00417165						1	2.5kb	none	20.1824	20.2602	0.067804	0.00334667		2	0.00963132						1	2.5kb	none	21.5503	21.5132	0.0899675	0.00418197		2	0.011031
1	2.5kb	none	19.6516					4	0.00864623						1	2.5kb	none	20.2911					4	0.011761						1	2.5kb	none	21.5787					4	0.0107115
1	2.5kb	none	19.5956					6	0.0144464						1	2.5kb	none	20.307					6	0.0122509						1	2.5kb	none	21.4106					6	0.0137945
1	ADH1	RsaI	18.915	19.0171	0.089235	0.00469236									1	ADH1	RsaI	19.547	19.6115	0.056599	0.00288601									1	ADH1	RsaI	20.861	20.8478	0.0553071	0.0026529
1	ADH1	RsaI	19.0561												1	ADH1	RsaI	19.6348												1	ADH1	RsaI	20.7871
1	ADH1	RsaI	19.0802												1	ADH1	RsaI	19.6528												1	ADH1	RsaI	20.8953
1	1.3kb	RsaI	28.1168	28.243	0.132176	0.00467998									1	1.3kb	RsaI	27.4187	27.3911	0.0518597	0.00189331									1	1.3kb	RsaI	28.6999	28.8809	0.18933	0.00655555
1	1.3kb	RsaI	28.2317												1	1.3kb	RsaI	27.4233												1	1.3kb	RsaI	28.8652
1	1.3kb	RsaI	28.3804												1	1.3kb	RsaI	27.3312												1	1.3kb	RsaI	29.0776
1	2.5kb	RsaI	28.0874	28.1814	0.101832	0.00361344									1	2.5kb	RsaI	27.1659	27.1939	0.06459	0.00237517									1	2.5kb	RsaI	28.4416	28.6659	0.301716	0.0105253
1	2.5kb	RsaI	28.1674												1	2.5kb	RsaI	27.148												1	2.5kb	RsaI	28.5472
1	2.5kb	RsaI	28.2896												1	2.5kb	RsaI	27.2678												1	2.5kb	RsaI	29.009
2	ADH1	none	19.1265	19.0579	0.0765988	0.00401926									2	ADH1	none	20.1278	20.025	0.0960087	0.00479443									2	ADH1	none	21.2905	21.2586	0.0285113	0.00134116
2	ADH1	none	18.9752												2	ADH1	none	19.9377												2	ADH1	none	21.2356
2	ADH1	none	19.072												2	ADH1	none	20.0096												2	ADH1	none	21.2498
2	1.3kb	none	20.1926	20.2086	0.0275901	0.00136527									2	1.3kb	none	21.3127	21.2933	0.111644	0.00524312									2	1.3kb	none	22.5908	22.637	0.043319	0.00191364
2	1.3kb	none	20.1927												2	1.3kb	none	21.3941												2	1.3kb	none	22.6767
2	1.3kb	none	20.2404												2	1.3kb	none	21.1733												2	1.3kb	none	22.6434
2	2.5kb	none	19.4582	19.4906	0.0390647	0.00200429									2	2.5kb	none	20.3073	20.405	0.0923164	0.00452421									2	2.5kb	none	21.7421	21.6869	0.0562469	0.00259359
2	2.5kb	none	19.534												2	2.5kb	none	20.4909												2	2.5kb	none	21.6888
2	2.5kb	none	19.4796												2	2.5kb	none	20.4167												2	2.5kb	none	21.6297
2	ADH1	RsaI	18.9707	18.9106	0.0850592	0.00449797									2	ADH1	RsaI	19.5262	19.7017	0.158386	0.00803922									2	ADH1	RsaI	21.0105	20.9665	0.047484	0.00226476
2	ADH1	RsaI	18.8504												2	ADH1	RsaI	19.7447												2	ADH1	RsaI	20.9162
2	ADH1	RsaI													2	ADH1	RsaI	19.8341												2	ADH1	RsaI	20.9727
2	1.3kb	RsaI	27.7765	27.9957	0.210058	0.00750322									2	1.3kb	RsaI	27.5536	27.7841	0.199694	0.00718735									2	1.3kb	RsaI	28.6761	28.9407	0.237768	0.00821568
2	1.3kb	RsaI	28.1952												2	1.3kb	RsaI	27.9064												2	1.3kb	RsaI	29.1365
2	1.3kb	RsaI	28.0154												2	1.3kb	RsaI	27.8922												2	1.3kb	RsaI	29.0095
2	2.5kb	RsaI	28.0504	28.0287	0.104723	0.00373628									2	2.5kb	RsaI	27.4034	27.5578	0.229814	0.00833936									2	2.5kb	RsaI	28.736	28.6735	0.241331	0.0084165
2	2.5kb	RsaI	27.9148												2	2.5kb	RsaI	27.8219												2	2.5kb	RsaI	28.4071
2	2.5kb	RsaI	28.1208												2	2.5kb	RsaI	27.4481												2	2.5kb	RsaI	28.8775
4	ADH1	none	18.4369	18.3414	0.0996324	0.00543211									4	ADH1	none	20.1869	20.1121	0.123738	0.00615243									4	ADH1	none	21.0606	20.9581	0.200592	0.00957106
4	ADH1	none	18.3491												4	ADH1	none	20.1801												4	ADH1	none	21.0868
4	ADH1	none	18.2381												4	ADH1	none	19.9693												4	ADH1	none	20.727
4	1.3kb	none	19.5931	19.7733	0.16158	0.00817162									4	1.3kb	none	21.559	21.5189	0.10524	0.00489057									4	1.3kb	none	22.3938	22.5197	0.119263	0.00529594
4	1.3kb	none	19.9052												4	1.3kb	none	21.5982												4	1.3kb	none	22.631
4	1.3kb	none	19.8217												4	1.3kb	none	21.3995												4	1.3kb	none	22.5344
4	2.5kb	none	18.9895	19.0289	0.0455172	0.002392									4	2.5kb	none	20.4611	20.5648	0.0909291	0.00442158									4	2.5kb	none	21.6876	21.6734	0.0240766	0.00111088
4	2.5kb	none	19.0185												4	2.5kb	none	20.6028												4	2.5kb	none	21.6456
4	2.5kb	none	19.0787												4	2.5kb	none	20.6306												4	2.5kb	none	21.687
4	ADH1	RsaI	18.2849	18.2498	0.0406859	0.00222938									4	ADH1	RsaI	19.7535	19.7893	0.059146	0.00298878									4	ADH1	RsaI	20.8604	20.7432	0.101588	0.00489743
4	ADH1	RsaI	18.2052												4	ADH1	RsaI	19.8576												4	ADH1	RsaI	20.6892
4	ADH1	RsaI	18.2594												4	ADH1	RsaI	19.7569												4	ADH1	RsaI	20.68
4	1.3kb	RsaI	26.1828	26.2356	0.0457202	0.00174268									4	1.3kb	RsaI	27.2668	27.3466	0.141414	0.00517118									4	1.3kb	RsaI	28.6449	28.7333	0.0826294	0.00287573
4	1.3kb	RsaI	26.2618												4	1.3kb	RsaI	27.5099												4	1.3kb	RsaI	28.8085
4	1.3kb	RsaI	26.2622												4	1.3kb	RsaI	27.2632												4	1.3kb	RsaI	28.7467
4	2.5kb	RsaI	26.7988	26.6504	0.160956	0.00603955									4	2.5kb	RsaI	27.4377	27.512	0.0871643	0.00316822									4	2.5kb	RsaI	28.6201	28.8626	0.223518	0.00774421
4	2.5kb	RsaI	26.4793												4	2.5kb	RsaI	27.608												4	2.5kb	RsaI	28.9074
4	2.5kb	RsaI	26.6729												4	2.5kb	RsaI	27.4904												4	2.5kb	RsaI	29.0603
6	ADH1	none		18.3942	0.182902	0.00994347									6	ADH1	none	20.4603	20.3863	0.178447	0.00875328									6	ADH1	none	21.1118	21.0429	0.0606376	0.00288161
6	ADH1	none	18.5235												6	ADH1	none	20.5158												6	ADH1	none	21.0197
6	ADH1	none	18.2649												6	ADH1	none	20.1828												6	ADH1	none	20.9974
6	1.3kb	none	20.1655	19.9365	0.205358	0.0103006									6	1.3kb	none	22.0495	21.8729	0.153633	0.00702391									6	1.3kb	none	22.744	22.6482	0.0866167	0.00382443
6	1.3kb	none	19.7686												6	1.3kb	none	21.7698												6	1.3kb	none	22.6256
6	1.3kb	none	19.8755												6	1.3kb	none	21.7994												6	1.3kb	none	22.5752
6	2.5kb	none	19.1768	19.1259	0.0866872	0.00453244									6	2.5kb	none	21.008	21.0726	0.0574651	0.00272701									6	2.5kb	none	21.7887	21.7811	0.0197127	0.000905039
6	2.5kb	none	19.0259												6	2.5kb	none	21.1181												6	2.5kb	none	21.7958
6	2.5kb	none	19.1752												6	2.5kb	none	21.0916												6	2.5kb	none	21.7587
6	ADH1	RsaI	18.2792	18.1646	0.101826	0.00560575									6	ADH1	RsaI	20.045	20.0821	0.0332608	0.00165624									6	ADH1	RsaI	20.8591	20.742	0.109216	0.00526545
6	ADH1	RsaI	18.0845												6	ADH1	RsaI	20.0919												6	ADH1	RsaI	20.7241
6	ADH1	RsaI	18.13												6	ADH1	RsaI	20.1093												6	ADH1	RsaI	20.6429
6	1.3kb	RsaI	24.8744	25.0234	0.147332	0.00588778									6	1.3kb	RsaI	27.1899	27.2986	0.0979012	0.00358631									6	1.3kb	RsaI	27.7587	27.9834	0.197697	0.00706481
6	1.3kb	RsaI	25.0267												6	1.3kb	RsaI	27.3798												6	1.3kb	RsaI	28.0609
6	1.3kb	RsaI	25.169												6	1.3kb	RsaI	27.3261												6	1.3kb	RsaI	28.1306
6	2.5kb	RsaI	25.79	25.8749	0.150091	0.00580066									6	2.5kb	RsaI	28.0396	27.9875	0.0451747	0.0016141									6	2.5kb	RsaI	28.4495	28.5269	0.181343	0.0063569
6	2.5kb	RsaI	25.7864												6	2.5kb	RsaI	27.9643												6	2.5kb	RsaI	28.3971
6	2.5kb	RsaI	26.0481												6	2.5kb	RsaI	27.9587												6	2.5kb	RsaI	28.7341

## Sheet: exo1 sgs1 640bp
Biological replicate 1												Biological Replicate 1, Technical Replicate 2												Biological Replicate 2												Biological Replicate 3
Time	Amplicon	Digest	Cq	Mean	SD	COV		Primer Efficiencies				Time	Amplicon	Digest	Cq	Mean	SD	COV		Primer Efficiencies				Time	Amplicon	Digest	Cq	Mean	SD	COV		Primer Efficiencies				Time	Amplicon	Digest	Cq	Mean	SD	COV		Primer Efficiencies
0	HOcs	none	21.4227	21.4761	0.0377795	0.00175914		HOcs	2.01			0	HOcs	none	21.5581	21.4197	0.117402	0.00548104		HOcs	2.01			0	HOcs	none	22.5096	22.2783	0.0682848	0.00306509		HOcs	2.01			0	HOcs	none	23.0814	22.9439	0.111388	0.00485479		HOcs	2.01
0	HOcs	none	21.4761					ADH1	1.98			0	HOcs	none	21.5027					ADH1	1.98			0	HOcs	none	22.3266					ADH1	1.98			0	HOcs	none	23.0227					ADH1	1.98
0	HOcs	none						640bp	1.96			0	HOcs	none	21.3366					640bp	1.96			0	HOcs	none	22.23					640bp	1.96			0	HOcs	none	22.8651					640bp	1.96
0	ADH1	none	19.3339	19.6245	0.381224	0.0194259						0	ADH1	none	19.6968	19.5932	0.0868431	0.00443231						0	ADH1	none	20.3313	20.2234	0.0724073	0.00358038						0	ADH1	none	21.1279	21.0449	0.0501446	0.00238274
0	ADH1	none	20.0394					Calculate HOcs Cut Fraction				0	ADH1	none	19.6028					Calculate HOcs Cut Fraction				0	ADH1	none	20.2206					Calculate HOcs Cut Fraction				0	ADH1	none	21.0389					Calculate HOcs Cut Fraction
0	ADH1	none	19.5002									0	ADH1	none	19.48									0	ADH1	none	20.1182									0	ADH1	none	20.968
0	640bp	none	20.4681	20.4632	0.139799	0.00683172		Cut	HOcs			0	640bp	none	20.7738	20.7055	0.0014391	6.95033e-05		Cut	HOcs			0	640bp	none	21.4174	21.3842	0.0180226	0.000842801		Cut	HOcs			0	640bp	none	22.1476	22.1131	0.0602224	0.00272338		Cut	HOcs
0	640bp	none	20.5597					Ref	ADH1			0	640bp	none	20.6724					Ref	ADH1			0	640bp	none	21.3548					Ref	ADH1			0	640bp	none	22.0532					Ref	ADH1
0	640bp	none	20.362									0	640bp	none	20.6704									0	640bp	none	21.3803									0	640bp	none	22.1384
0	ADH1	RsaI	19.6306	19.5965	0.203042	0.0103611		Time	Fraction			0	ADH1	RsaI	19.7936	19.7783	0.130228	0.00658439		Time	Fraction			0	ADH1	RsaI	20.2243	20.2116	0.013134	0.000649826		Time	Fraction			0	ADH1	RsaI	21.0213	21.0431	0.0605727	0.0028785		Time	Fraction
0	ADH1	RsaI	19.3434					0	0			0	ADH1	RsaI	19.9778					0	0			0	ADH1	RsaI	20.2057					0	0			0	ADH1	RsaI	21.1069					0	0
0	ADH1	RsaI	19.8156					1	0.843491			0	ADH1	RsaI	19.5635					1	0.785856			0	ADH1	RsaI	20.2046					1	0.803084			0	ADH1	RsaI	21.0011					1	0.815169
0	640bp	RsaI	27.5813	27.6375	0.0901467	0.00326175		2	0.910888			0	640bp	RsaI	27.5738	27.5648	0.117401	0.00425908		2	0.859517			0	640bp	RsaI	26.1952	26.3778	0.0934032	0.00354097		2	0.85357			0	640bp	RsaI	28.0162	28.1566	0.0786801	0.00279438		2	0.869569
0	640bp	RsaI	27.7294					4	0.896114			0	640bp	RsaI	27.4773					4	0.910542			0	640bp	RsaI	26.4031					4	0.898492			0	640bp	RsaI	28.1711					4	0.908741
0	640bp	RsaI	27.6019					6	0.913504			0	640bp	RsaI	27.6434					6	0.916039			0	640bp	RsaI	26.5352					6	0.894077			0	640bp	RsaI	28.2824					6	0.909541
1	HOcs	none	23.8212	23.8608	0.317792	0.0133186						1	HOcs	none	23.082	23.1607	0.063642	0.00274785						1	HOcs	none	24.6222	24.696	0.0537999	0.00217849						1	HOcs	none	25.3662	25.2523	0.144387	0.00571779
1	HOcs	none	23.6559									1	HOcs	none	23.1157									1	HOcs	none	24.734									1	HOcs	none	25.2974
1	HOcs	none	24.1053									1	HOcs	none	23.2057									1	HOcs	none	24.6579									1	HOcs	none	25.0932
1	ADH1	none	19.2919	19.3466	0.0273034	0.00141127						1	ADH1	none	19.7179	19.1165	0.633521	0.0331401						1	ADH1	none	20.3474	20.3154	0.0978361	0.00481585						1	ADH1	none	20.9296	20.9325	0.146738	0.00701006
1	ADH1	none	19.2533					Calculate Resected Fraction				1	ADH1	none	18.822					Calculate Resected Fraction				1	ADH1	none	20.4858					Calculate Resected Fraction				1	ADH1	none	21.1371					Calculate Resected Fraction
1	ADH1	none	19.4945									1	ADH1	none	18.8095									1	ADH1	none	20.1131									1	ADH1	none	20.731
1	640bp	none	19.8634	19.7996	0.120257	0.00607371		Cut	640bp			1	640bp	none	19.9887	19.955	0.329012	0.0164877		Cut	640bp			1	640bp	none	21.1967	21.1777	0.202617	0.00956747		Cut	640bp			1	640bp	none	21.4129	21.4776	0.176264	0.00820686		Cut	640bp
1	640bp	none	19.8527					Ref	ADH1			1	640bp	none	19.7055					Ref	ADH1			1	640bp	none	21.025					Ref	ADH1			1	640bp	none	21.3853					Ref	ADH1
1	640bp	none	19.6827									1	640bp	none	20.1708									1	640bp	none	21.3115									1	640bp	none	21.6346
1	ADH1	RsaI	20.0944	19.6521	0.351851	0.017904		Time	Fraction			1	ADH1	RsaI	19.2651	19.1233	0.143414	0.00749945		Time	Fraction			1	ADH1	RsaI	20.2297	20.1662	0.146763	0.00727768		Time	Fraction			1	ADH1	RsaI	20.8608	20.7632	0.180299	0.00868358		Time	Fraction
1	ADH1	RsaI	19.1821					0	0			1	ADH1	RsaI	19.1538					0	0			1	ADH1	RsaI	20.2382					0	0			1	ADH1	RsaI	20.8418					0	0
1	ADH1	RsaI	19.6797					1	0.011921			1	ADH1	RsaI	18.951					1	0.0173022			1	ADH1	RsaI	20.0306					1	0.0378377			1	ADH1	RsaI	20.5869					1	0.0208377
1	640bp	RsaI	27.9331	27.9673	0.0520747	0.00186198		2	0.044153			1	640bp	RsaI	27.3733	27.3685	0.0747416	0.00273094		2	0.0519807			1	640bp	RsaI	27.0684	27.2252	0.05898	0.00216637		2	0.0628749			1	640bp	RsaI	28.3492	28.379	0.00591899	0.000208569		2	0.0446117
1	640bp	RsaI	27.9476					4	0.115395			1	640bp	RsaI	27.4189					4	0.146125			1	640bp	RsaI	27.3453					4	0.204159			1	640bp	RsaI	28.3982					4	0.123769
1	640bp	RsaI	28.0213					6	0.242723			1	640bp	RsaI	27.3132					6	0.288457			1	640bp	RsaI	27.2619					6	0.263685			1	640bp	RsaI	28.3898					6	0.201142
2	HOcs	none	25.614	24.5017	0.152403	0.00622009						2	HOcs	none	23.7871	23.6508	0.016537	0.000699212						2	HOcs	none	25.2605	25.2389	0.0207955	0.000823946						2	HOcs	none	25.8736	25.7652	0.0406085	0.0015761
2	HOcs	none	24.0532									2	HOcs	none	23.5944									2	HOcs	none	25.2133									2	HOcs	none	25.6823
2	HOcs	none	23.8377									2	HOcs	none	23.571									2	HOcs	none	25.2427									2	HOcs	none	25.7397
2	ADH1	none	19.1536	19.1771	0.00323736	0.000168814						2	ADH1	none	18.9234	19.0003	0.0355736	0.00187227						2	ADH1	none	20.3024	20.4366	0.204631	0.0100129						2	ADH1	none	20.9286	20.9464	0.019432	0.000927698
2	ADH1	none	19.1865									2	ADH1	none	19.0136									2	ADH1	none	20.6484									2	ADH1	none	20.9416
2	ADH1	none	19.191									2	ADH1	none	19.0639									2	ADH1	none	20.359									2	ADH1	none	20.9691
2	640bp	none	19.601	19.8236	0.175326	0.00884428						2	640bp	none	20.0541	20.0469	0.0694445	0.00346411						2	640bp	none	21.4987	21.3575	0.0840753	0.00393657						2	640bp	none	21.7788	21.6658	0.152207	0.00702521
2	640bp	none	19.8109									2	640bp	none	19.9941									2	640bp	none	21.2275									2	640bp	none	21.5016
2	640bp	none	20.0589									2	640bp	none	20.0924									2	640bp	none	21.3464									2	640bp	none	21.7169
2	ADH1	RsaI	19.398	19.3608	0.0853406	0.00440792						2	ADH1	RsaI	19.1387	19.0865	0.1217	0.00637622						2	ADH1	RsaI	20.2786	20.2755	0.056242	0.00277389						2	ADH1	RsaI	20.8785	20.875	0.00463292	0.000221936
2	ADH1	RsaI	19.4025									2	ADH1	RsaI	19.1465									2	ADH1	RsaI	20.3138									2	ADH1	RsaI	20.8765
2	ADH1	RsaI	19.2818									2	ADH1	RsaI	18.9744									2	ADH1	RsaI	20.2342									2	ADH1	RsaI	20.87
2	640bp	RsaI	25.4732	25.7851	0.379032	0.0146996						2	640bp	RsaI	25.8195	25.7497	0.172791	0.00671041						2	640bp	RsaI	26.4801	26.5301	0.0431727	0.00162731						2	640bp	RsaI	27.3176	27.423	0.0426743	0.00155615
2	640bp	RsaI	26.2091									2	640bp	RsaI	25.837									2	640bp	RsaI	26.5856									2	640bp	RsaI	27.4455
2	640bp	RsaI	25.6731									2	640bp	RsaI	25.5927									2	640bp	RsaI	26.5245									2	640bp	RsaI	27.5058
4	HOcs	none	24.4672	24.397	0.128902	0.00528351						4	HOcs	none	23.8342	23.8659	0.057946	0.00242799						4	HOcs	none	25.8228	25.8171	0.0486654	0.00188501						4	HOcs	none	26.2257	26.0069	0.196373	0.00755082
4	HOcs	none	24.2849									4	HOcs	none	23.9161									4	HOcs	none	25.8916									4	HOcs	none	25.948
4	HOcs	none	24.4388									4	HOcs	none	23.8473									4	HOcs	none	25.7368									4	HOcs	none	25.8471
4	ADH1	none	19.4922	19.2946	0.0118235	0.000612784						4	ADH1	none	18.7966	18.5594	0.0833551	0.00449127						4	ADH1	none	20.5777	20.4912	0.00734007	0.000358207						4	ADH1	none	20.7044	20.6706	0.0221136	0.0010698
4	ADH1	none	19.1875									4	ADH1	none	18.3818									4	ADH1	none	20.4531									4	ADH1	none	20.6694
4	ADH1	none	19.2042									4	ADH1	none	18.4997									4	ADH1	none	20.4427									4	ADH1	none	20.6381
4	640bp	none	20.2033	20.1504	0.0912476	0.00452832						4	640bp	none	19.6828	19.8209	0.263242	0.013281						4	640bp	none	21.8741	21.7789	0.17702	0.00812808						4	640bp	none	21.8168	21.7705	0.224731	0.0103227
4	640bp	none	20.0595									4	640bp	none	19.7038									4	640bp	none	21.8564									4	640bp	none	21.5884
4	640bp	none	20.1885									4	640bp	none	20.0761									4	640bp	none	21.6061									4	640bp	none	21.9063
4	ADH1	RsaI	19.2533	19.1698	0.102103	0.00532623						4	ADH1	RsaI	18.6163	18.6607	0.136918	0.00733725						4	ADH1	RsaI	20.2441	20.4626	0.326542	0.015958						4	ADH1	RsaI	20.5821	20.7251	0.0170449	0.000822429
4	ADH1	RsaI	19.0559									4	ADH1	RsaI	18.7797									4	ADH1	RsaI	20.8028									4	ADH1	RsaI	20.7845
4	ADH1	RsaI	19.2003									4	ADH1	RsaI	18.586									4	ADH1	RsaI	20.341									4	ADH1	RsaI	20.8086
4	640bp	RsaI	24.3308	24.3467	0.0103573	0.000425408						4	640bp	RsaI	23.977	23.8487	0.111178	0.00466179						4	640bp	RsaI	24.961	25.1571	0.0681112	0.00270744						4	640bp	RsaI	25.8319	26.0167	0.0708388	0.00272282
4	640bp	RsaI	24.3473									4	640bp	RsaI	23.8632									4	640bp	RsaI	25.2069									4	640bp	RsaI	26.0591
4	640bp	RsaI	24.362									4	640bp	RsaI	23.706									4	640bp	RsaI	25.3032									4	640bp	RsaI	26.1592
6	HOcs	none	24.7026	24.2451	0.647128	0.0266911						6	HOcs	none	24.0625	24.0143	0.0536107	0.00223245						6	HOcs	none	25.7111	25.6789	0.136729	0.00532457						6	HOcs	none	26.3042	26.1148	0.0680062	0.00260412
6	HOcs	none										6	HOcs	none	24.0282									6	HOcs	none	25.5661									6	HOcs	none	25.9721
6	HOcs	none	23.7875									6	HOcs	none	23.9523									6	HOcs	none	25.7595									6	HOcs	none	26.0682
6	ADH1	none	18.8761	18.8712	0.0764813	0.00405281						6	ADH1	none	18.6031	18.6183	0.043367	0.00232927						6	ADH1	none	20.3987	20.4123	0.106993	0.00524162						6	ADH1	none	20.6753	20.768	0.112916	0.00543702
6	ADH1	none	18.7923									6	ADH1	none	18.6672									6	ADH1	none	20.5254									6	ADH1	none	20.8938
6	ADH1	none	18.9451									6	ADH1	none	18.5845									6	ADH1	none	20.3127									6	ADH1	none	20.7351
6	640bp	none	20.1869	20.3468	0.269831	0.0132616						6	640bp	none	20.0948	20.1532	0.0885848	0.00439557						6	640bp	none	21.8666	21.8392	0.259065	0.0118624						6	640bp	none	22.1456	22.1041	0.256607	0.011609
6	640bp	none	20.6175									6	640bp	none	20.1198									6	640bp	none	21.6422									6	640bp	none	21.9019
6	640bp	none	20.2359									6	640bp	none	20.2451									6	640bp	none	22.0086									6	640bp	none	22.2648
6	ADH1	RsaI	19.0082	18.7973	0.044161	0.00234932						6	ADH1	RsaI	18.762	18.6071	0.0527601	0.00283548						6	ADH1	RsaI	20.2353	20.2244	0.228284	0.0112876						6	ADH1	RsaI	20.7239	20.7608	0.0369098	0.00177786
6	ADH1	RsaI	18.7231									6	ADH1	RsaI	18.567									6	ADH1	RsaI	20.3803									6	ADH1	RsaI	20.8054
6	ADH1	RsaI	18.6606									6	ADH1	RsaI	18.4924									6	ADH1	RsaI	20.0575									6	ADH1	RsaI	20.7532
6	640bp	RsaI	23.4542	23.3656	0.00403357	0.000172628						6	640bp	RsaI	23.0381	22.9391	0.166988	0.00727961						6	640bp	RsaI	24.3408	24.6393	0.153792	0.00624173						6	640bp	RsaI	25.4025	25.5083	0.0104048	0.000407899
6	640bp	RsaI	23.3185									6	640bp	RsaI	22.7716									6	640bp	RsaI	24.6798									6	640bp	RsaI	25.5685
6	640bp	RsaI	23.3242									6	640bp	RsaI	23.0077									6	640bp	RsaI	24.8973									6	640bp	RsaI	25.5538

## Sheet: rad24 1.3 kb & 2.5 kb
Biological Replicate 1															Biological Replicate 2															Biological Replicate 3
Time	Amplicon	Digest	Cq	Mean	SD	COV		Primer Efficiencies							Time	Amplicon	Digest	Cq	Mean	SD	COV		Primer Efficiencies							Time	Amplicon	Digest	Cq	Mean	SD	COV		Primer Efficiencies
0	ADH1	none	18.8587	18.5603	0.265686	0.0143147		ADH1	1.98						0	ADH1	none	19.4502	19.2364	0.203099	0.010558		ADH1	1.98						0	ADH1	none	20.5483	20.2406	0.266878	0.0131853		ADH1	1.98
0	ADH1	none	18.4727					RsaIcs +1.3kb	2.02						0	ADH1	none	19.213					RsaIcs +1.3kb	2.02						0	ADH1	none	20.0736					RsaIcs +1.3kb	2.02
0	ADH1	none	18.3495					RsaIcs +2.5kb	2		Calculate HOcs Cut Fraction				0	ADH1	none	19.0461					RsaIcs +2.5kb	2		Calculate HOcs Cut Fraction				0	ADH1	none	20.0997					RsaIcs +2.5kb	2		Calculate HOcs Cut Fraction
0	1.3kb	none	20.144	20.0671	0.0671728	0.00334741									0	1.3kb	none	20.6307	20.5707	0.052359	0.00254533									0	1.3kb	none	22.1433	21.7333	0.365413	0.0168135
0	1.3kb	none	20.0375					Calculate resected fraction			Cut	HOcs			0	1.3kb	none	20.5464					Calculate resected fraction			Cut	HOcs			0	1.3kb	none	21.6144					Calculate resected fraction			Cut	HOcs
0	1.3kb	none	20.0198								Ref	ADH1			0	1.3kb	none	20.5348								Ref	ADH1			0	1.3kb	none	21.4421								Ref	ADH1
0	2.5kb	none	19.2962	19.2084	0.0795213	0.00413992		Cut	1.3kb						0	2.5kb	none	19.9313	19.8256	0.0998889	0.00503838		Cut	1.3kb						0	2.5kb	none	20.8666	20.8652	0.170623	0.00817738		Cut	1.3kb
0	2.5kb	none	19.1878					Ref	ADH1		Time	Fraction			0	2.5kb	none	19.8127					Ref	ADH1		Time	Fraction			0	2.5kb	none	21.0351					Ref	ADH1		Time	Fraction
0	2.5kb	none	19.1413								0	0			0	2.5kb	none	19.7328								0	0			0	2.5kb	none	20.6939								0	0
0	ADH1	RsaI	18.2391	18.3667	0.199522	0.0108632		Time	Fraction		1	0.93389			0	ADH1	RsaI	18.5717	18.8026	0.201606	0.0107223		Time	Fraction		1	0.93389			0	ADH1	RsaI	19.7022	19.7269	0.0364919	0.00184985		Time	Fraction		1	0.93389
0	ADH1	RsaI	18.2644					0	0		2	0.964242			0	ADH1	RsaI	18.944					0	0		2	0.964242			0	ADH1	RsaI	19.7098					0	0		2	0.964242
0	ADH1	RsaI	18.5967					1	0.163043		4	0.974432			0	ADH1	RsaI	18.892					1	0.170453		4	0.974432			0	ADH1	RsaI	19.7688					1	0.159632		4	0.974432
0	1.3kb	RsaI		27.4941	0.114866	0.00417785		2	0.0864886		6	0.983424			0	1.3kb	RsaI	26.4027	26.5324	0.113699	0.00428528		2	0.464332		6	0.983424			0	1.3kb	RsaI	27.7482	27.9066	0.145701	0.00522102		2	0.406583		6	0.983424
0	1.3kb	RsaI	27.4129					4	0.581166						0	1.3kb	RsaI	26.6146					4	0.654209						0	1.3kb	RsaI	28.0349					4	0.616795
0	1.3kb	RsaI	27.5753					6	0.654419						0	1.3kb	RsaI	26.5801					6	0.620036						0	1.3kb	RsaI	27.9367					6	0.591748
0	2.5kb	RsaI	27.1577	27.2197	0.0591206	0.00217197									0	2.5kb	RsaI	26.2522	26.3172	0.0713617	0.0027116									0	2.5kb	RsaI	27.488	27.462	0.104276	0.00379708
0	2.5kb	RsaI	27.2755					Calculate resected fraction							0	2.5kb	RsaI	26.3936					Calculate resected fraction							0	2.5kb	RsaI	27.5508					Calculate resected fraction
0	2.5kb	RsaI	27.226												0	2.5kb	RsaI	26.3058												0	2.5kb	RsaI	27.3472
1	ADH1	none	18.773	18.5846	0.188086	0.0101205		Cut	2.5kb						1	ADH1	none	19.6007	19.5105	0.127452	0.00653249		Cut	2.5kb						1	ADH1	none	20.0904	19.9837	0.0952092	0.00476435		Cut	2.5kb
1	ADH1	none	18.3969					Ref	ADH1						1	ADH1	none						Ref	ADH1						1	ADH1	none	19.9075					Ref	ADH1
1	ADH1	none	18.584												1	ADH1	none	19.4204												1	ADH1	none	19.9531
1	1.3kb	none	19.8741	19.9529	0.091076	0.00456456		Time	Fraction						1	1.3kb	none	20.7127	20.6862	0.0574968	0.00277947		Time	Fraction						1	1.3kb	none	21.0975	21.1486	0.148177	0.00700645		Time	Fraction
1	1.3kb	none	19.9319					0	0						1	1.3kb	none	20.7257					0	0						1	1.3kb	none	21.3156					0	0
1	1.3kb	none	20.0526					1	0.0415945						1	1.3kb	none	20.6203					1	0.0430384						1	1.3kb	none	21.0328					1	0.0432352
1	2.5kb	none	19.1994	18.9016	0.257937	0.0136463		2	0.282683						1	2.5kb	none	19.8042	19.9166	0.129316	0.0064929		2	0.300399						1	2.5kb	none	20.4073	20.1337	0.242686	0.0120537		2	0.231754
1	2.5kb	none	18.7503					4	0.441749						1	2.5kb	none	20.0579					4	0.495725						1	2.5kb	none	20.0495					4	0.472901
1	2.5kb	none	18.7551					6	0.555975						1	2.5kb	none	19.8876					6	0.474701						1	2.5kb	none	19.9444					6	0.527981
1	ADH1	RsaI	18.2546	18.3287	0.0992428	0.00541462									1	ADH1	RsaI	18.9237	19.016	0.08893	0.00467658									1	ADH1	RsaI	19.6826	19.6493	0.0419468	0.00213477
1	ADH1	RsaI	18.29												1	ADH1	RsaI	19.1011												1	ADH1	RsaI	19.6632
1	ADH1	RsaI	18.4414												1	ADH1	RsaI	19.0233												1	ADH1	RsaI	19.6022
1	1.3kb	RsaI	22.9895	23.0425	0.0739989	0.00321141									1	1.3kb	RsaI	23.4344	23.4747	0.0386069	0.00164462									1	1.3kb	RsaI	24.1152	24.195	0.0867027	0.00358349
1	1.3kb	RsaI	23.0109												1	1.3kb	RsaI	23.5114												1	1.3kb	RsaI	24.1826
1	1.3kb	RsaI	23.127												1	1.3kb	RsaI	23.4783												1	1.3kb	RsaI	24.2873
1	2.5kb	RsaI	23.9595	24.1056	0.126768	0.00525886									1	2.5kb	RsaI	24.745	24.8352	0.114433	0.00460772									1	2.5kb	RsaI	25.1877	25.2034	0.0137259	0.000544605
1	2.5kb	RsaI	24.1854												1	2.5kb	RsaI	24.7966												1	2.5kb	RsaI	25.2093
1	2.5kb	RsaI	24.1721												1	2.5kb	RsaI	24.9639												1	2.5kb	RsaI	25.2132
2	ADH1	none	18.3395	18.2216	0.102171	0.00560713									2	ADH1	none	20.2808	19.9528	0.290967	0.0145828									2	ADH1	none	20.5376	20.3701	0.147092	0.007221
2	ADH1	none	18.1662												2	ADH1	none	19.7257												2	ADH1	none	20.2621
2	ADH1	none	18.1592												2	ADH1	none	19.8518												2	ADH1	none	20.3105
2	1.3kb	none	20.3663	20.3131	0.0714478	0.00351732									2	1.3kb	none	21.8004	21.7421	0.0678884	0.00312244									2	1.3kb	none	22.2621	22.2439	0.0935566	0.00420595
2	1.3kb	none	20.2319												2	1.3kb	none	21.6676												2	1.3kb	none	22.327
2	1.3kb	none	20.3411												2	1.3kb	none	21.7584												2	1.3kb	none	22.1426
2	2.5kb	none	19.5047	19.4998	0.102394	0.00525103									2	2.5kb	none	20.837	20.9808	0.163429	0.00778942									2	2.5kb	none	21.3928	21.3403	0.0852924	0.00399678
2	2.5kb	none	19.3951												2	2.5kb	none	20.947												2	2.5kb	none	21.2419
2	2.5kb	none	19.5997												2	2.5kb	none	21.1586												2	2.5kb	none	21.3862
2	ADH1	RsaI	17.9344	18.0639	0.114973	0.00636481									2	ADH1	RsaI	19.454	19.4771	0.0410243	0.00210628									2	ADH1	RsaI	20.0839	20.0561	0.0279976	0.00139596
2	ADH1	RsaI	18.1035												2	ADH1	RsaI	19.4529												2	ADH1	RsaI	20.0564
2	ADH1	RsaI	18.1538												2	ADH1	RsaI	19.5245												2	ADH1	RsaI	20.0279
2	1.3kb	RsaI	24.51	24.51	#DIV/0!	#DIV/0!									2	1.3kb	RsaI	22.7933	22.9134	0.113192	0.00493999									2	1.3kb	RsaI	23.6711	23.8161	0.125614	0.00527433
2	1.3kb	RsaI													2	1.3kb	RsaI	23.0181												2	1.3kb	RsaI	23.8852
2	1.3kb	RsaI													2	1.3kb	RsaI	22.9288												2	1.3kb	RsaI	23.892
2	2.5kb	RsaI	21.6306	21.8859	0.221102	0.0101025									2	2.5kb	RsaI	22.7908	22.9503	0.14005	0.00610229									2	2.5kb	RsaI	23.7945	23.9029	0.163957	0.0068593
2	2.5kb	RsaI	22.013												2	2.5kb	RsaI	23.0531												2	2.5kb	RsaI	23.8228
2	2.5kb	RsaI	22.0141												2	2.5kb	RsaI	23.0071												2	2.5kb	RsaI	24.0915
4	ADH1	none	18.4391	18.4029	0.075764	0.00411697									4	ADH1	none	19.8856	19.8251	0.0830304	0.00418813									4	ADH1	none	20.4862	20.3288	0.151599	0.00745733
4	ADH1	none	18.4537												4	ADH1	none	19.8594												4	ADH1	none	20.3163
4	ADH1	none	18.3158												4	ADH1	none	19.7305												4	ADH1	none	20.1838
4	1.3kb	none	21.4407	21.4435	0.0150766	0.000703087									4	1.3kb	none	22.0507	22.3417	0.411525	0.0184196									4	1.3kb	none	22.7757	22.7814	0.0483674	0.00212311
4	1.3kb	none	21.4597												4	1.3kb	none	22.6327												4	1.3kb	none	22.8324
4	1.3kb	none	21.43												4	1.3kb	none													4	1.3kb	none	22.7362
4	2.5kb	none	20.732	20.5815	0.131814	0.00640449									4	2.5kb	none	21.1473	21.1305	0.014499	0.000686162									4	2.5kb	none	22.0936	21.8999	0.244181	0.0111499
4	2.5kb	none	20.526												4	2.5kb	none	21.1214												4	2.5kb	none	21.9805
4	2.5kb	none	20.4865												4	2.5kb	none	21.123												4	2.5kb	none	21.6256
4	ADH1	RsaI	18.0482	18.1322	0.0729432	0.00402286									4	ADH1	RsaI	19.3271	19.4384	0.102687	0.0052827									4	ADH1	RsaI	20.086	19.9993	0.0750945	0.00375486
4	ADH1	RsaI	18.1799												4	ADH1	RsaI	19.4587												4	ADH1	RsaI	19.9536
4	ADH1	RsaI	18.1684												4	ADH1	RsaI	19.5294												4	ADH1	RsaI	19.9584
4	1.3kb	RsaI	22.2535	22.3977	0.127829	0.00570723									4	1.3kb	RsaI	22.8291	22.9368	0.0945294	0.00412131									4	1.3kb	RsaI	23.432	23.5564	0.107762	0.00457463
4	1.3kb	RsaI	22.4971												4	1.3kb	RsaI	23.0061												4	1.3kb	RsaI	23.6194
4	1.3kb	RsaI	22.4424												4	1.3kb	RsaI	22.975												4	1.3kb	RsaI	23.6178
4	2.5kb	RsaI	22.0236	22.0852	0.0854505	0.00386912									4	2.5kb	RsaI	22.711	22.301	0.579799	0.0259988									4	2.5kb	RsaI	23.2346	23.2172	0.120711	0.00519921
4	2.5kb	RsaI	22.0493												4	2.5kb	RsaI													4	2.5kb	RsaI	23.0888
4	2.5kb	RsaI	22.1828												4	2.5kb	RsaI	21.891												4	2.5kb	RsaI	23.3283
6	ADH1	none	17.5255	17.5788	0.048695	0.0027701									6	ADH1	none	19.3296	19.2218	0.0946954	0.00492646									6	ADH1	none	20.003	19.918	0.0997465	0.00500784
6	ADH1	none	17.5898												6	ADH1	none	19.152												6	ADH1	none	19.8082
6	ADH1	none	17.621												6	ADH1	none	19.1839												6	ADH1	none	19.9429
6	1.3kb	none	20.8954	20.9597	0.111427	0.00531623									6	1.3kb	none	21.3925	21.3796	0.0664472	0.00310797									6	1.3kb	none	22.2252	22.198	0.0307177	0.00138381
6	1.3kb	none	20.8954												6	1.3kb	none	21.3077												6	1.3kb	none	22.2041
6	1.3kb	none	21.0884												6	1.3kb	none	21.4387												6	1.3kb	none	22.1647
6	2.5kb	none	20.1413	20.2526	0.107768	0.00532121									6	2.5kb	none	20.4481	20.5716	0.109301	0.00531323									6	2.5kb	none	21.5402	21.5571	0.0442873	0.00205442
6	2.5kb	none	20.3564												6	2.5kb	none	20.6561												6	2.5kb	none	21.6073
6	2.5kb	none	20.26												6	2.5kb	none	20.6104												6	2.5kb	none	21.5237
6	ADH1	RsaI	17.2395	17.1789	0.126474	0.00736217									6	ADH1	RsaI	19.0051	18.9973	0.049657	0.0026139									6	ADH1	RsaI	19.6039	19.4032	0.217716	0.0112207
6	ADH1	RsaI	17.0335												6	ADH1	RsaI	18.9442												6	ADH1	RsaI	19.1718
6	ADH1	RsaI	17.2636												6	ADH1	RsaI	19.0426												6	ADH1	RsaI	19.4338
6	1.3kb	RsaI	21.3626	21.5609	0.200655	0.00930643									6	1.3kb	RsaI	22.177	22.2647	0.0838617	0.00376657									6	1.3kb	RsaI	22.7757	22.897	0.107648	0.00470139
6	1.3kb	RsaI	21.5562												6	1.3kb	RsaI	22.3441												6	1.3kb	RsaI	22.9346
6	1.3kb	RsaI	21.7639												6	1.3kb	RsaI	22.2732												6	1.3kb	RsaI	22.9809
6	2.5kb	RsaI	21.1209	21.2019	0.0823303	0.00388316									6	2.5kb	RsaI	21.701	22.0026	0.264897	0.0120394									6	2.5kb	RsaI	22.298	22.496	0.186032	0.00826955
6	2.5kb	RsaI	21.2855												6	2.5kb	RsaI	22.1979												6	2.5kb	RsaI	22.523
6	2.5kb	RsaI	21.1994												6	2.5kb	RsaI	22.1088												6	2.5kb	RsaI	22.6671

## Sheet: rad24 640bp
Biological replicate 1												Biological Replicate 1, Technical Replicate 2												Biological Replicate 2												Biological Replicate 3
Time	Amplicon	Digest	Cq	Mean	SD	COV		Primer Efficiencies				Time	Amplicon	Digest	Cq	Mean	SD	COV		Primer Efficiencies				Time	Amplicon	Digest	Cq	Mean	SD	COV		Primer Efficiencies				Time	Amplicon	Digest	Cq	Mean	SD	COV		Primer Efficiencies
0	HOcs	none	21.0306	22.2969	2.11993	0.0950772		HOcs	2.01			0	HOcs	none	21.171	20.9965	0.0019572	9.32152e-05		HOcs	2.01			0	HOcs	none	21.7314	21.714	0.0136251	0.00062748		HOcs	2.01			0	HOcs	none	22.0473	21.7257	0.0817061	0.00376081		HOcs	2.01
0	HOcs	none	23.7959					ADH1	1.98			0	HOcs	none	20.9952					ADH1	1.98			0	HOcs	none	21.7044					ADH1	1.98			0	HOcs	none	21.6679					ADH1	1.98
0	HOcs	none	20.7979					640bp	1.96			0	HOcs	none	20.9979					640bp	1.96			0	HOcs	none	21.7237					640bp	1.96			0	HOcs	none	21.7834					640bp	1.96
0	ADH1	none	21.2527	20.0154	0.156238	0.00780591						0	ADH1	none	19.2592	19.2788	0.0584248	0.00303052						0	ADH1	none	20.0612	20.1634	0.00607835	0.000301454						0	ADH1	none	20.0734	20.1541	0.0394482	0.00195733
0	ADH1	none	19.2862					Calculate HOcs Cut Fraction				0	ADH1	none	19.3299					Calculate HOcs Cut Fraction				0	ADH1	none	20.2188					Calculate HOcs Cut Fraction				0	ADH1	none	20.2224					Calculate HOcs Cut Fraction
0	ADH1	none	19.5072									0	ADH1	none	19.2473									0	ADH1	none	20.2102									0	ADH1	none	20.1666
0	640bp	none	20.6306	20.6157	0.126947	0.00615777		Cut	HOcs			0	640bp	none	20.2501	20.2685	0.151324	0.00746594		Cut	HOcs			0	640bp	none	20.9369	20.9702	0.0766463	0.00365502		Cut	HOcs			0	640bp	none	21.1511	21.153	0.132966	0.00628592		Cut	HOcs
0	640bp	none	20.6981					Ref	ADH1			0	640bp	none	20.1707					Ref	ADH1			0	640bp	none	20.9326					Ref	ADH1			0	640bp	none	21.0599					Ref	ADH1
0	640bp	none	20.5186									0	640bp	none	20.3847									0	640bp	none	21.041									0	640bp	none	21.248
0	ADH1	RsaI	19.4308	20.5281	0.0330112	0.0016081		Time	Fraction			0	ADH1	RsaI	19.1481	19.1802	0.0650519	0.00339163		Time	Fraction			0	ADH1	RsaI	19.8072	19.9035	0.145143	0.00729232		Time	Fraction			0	ADH1	RsaI	20.1788	20.2824	0.10677	0.00526417		Time	Fraction
0	ADH1	RsaI	19.3842					0	0			0	ADH1	RsaI	19.2401					0	0			0	ADH1	RsaI	20.0124					0	0			0	ADH1	RsaI	20.3298					0	0
0	ADH1	RsaI	22.7692					1	0.886947			0	ADH1	RsaI	19.1522					1	0.93389			0	ADH1	RsaI	19.8909					1	0.929645			0	ADH1	RsaI	20.3385					1	0.92979
0	640bp	RsaI	28.2208	28.4042	0.0995651	0.00350529		2	0.94447			0	640bp	RsaI	28.0661	28.0796	0.226573	0.00806896		2	0.964242			0	640bp	RsaI	27.057	27.169	0.0307539	0.00113195		2	0.945021			0	640bp	RsaI	27.6389	27.6624	0.0652479	0.00235872		2	0.932421
0	640bp	RsaI	28.5663					4	0.969824			0	640bp	RsaI	27.9261					4	0.974432			0	640bp	RsaI	27.2468					4	0.962612			0	640bp	RsaI	27.628					4	0.949506
0	640bp	RsaI	28.4255					6	0.979787			0	640bp	RsaI	28.2466					6	0.983424			0	640bp	RsaI	27.2033					6	0.972304			0	640bp	RsaI	27.7203					6	0.957491
1	HOcs	none	27.3501	24.5556	0.169539	0.00690428						1	HOcs	none	24.5109	24.3636	0.0510079	0.00209361						1	HOcs	none	25.6666	25.311	0.0079053	0.000312326						1	HOcs	none	25.3436	25.3545	0.155995	0.00615256
1	HOcs	none	24.6755									1	HOcs	none	24.3275									1	HOcs	none	25.3055									1	HOcs	none	25.2496
1	HOcs	none	24.4357									1	HOcs	none	24.3996									1	HOcs	none	25.3166									1	HOcs	none	25.4702
1	ADH1	none	19.2366	19.1326	0.183855	0.00960955						1	ADH1	none	18.7448	18.7433	0.11095	0.00591945						1	ADH1	none	20.0495	19.9541	0.0227216	0.00113869						1	ADH1	none	20.0532	19.9742	0.0966642	0.00483945
1	ADH1	none	18.9766					Calculate Resected Fraction				1	ADH1	none	18.5879					Calculate Resected Fraction				1	ADH1	none	20.0173					Calculate Resected Fraction				1	ADH1	none	19.9165					Calculate Resected Fraction
1	ADH1	none	19.1845									1	ADH1	none	18.8971									1	ADH1	none	19.7955									1	ADH1	none	19.953
1	640bp	none	20.2333	20.21	0.15411	0.00762544		Cut	640bp			1	640bp	none	20.0076	19.9407	0.0529044	0.00265308		Cut	640bp			1	640bp	none	20.9598	20.9128	0.0072784	0.000348036		Cut	640bp			1	640bp	none	20.8768	20.9825	0.00490625	0.000233826		Cut	640bp
1	640bp	none	20.3073					Ref	ADH1			1	640bp	none	19.8698					Ref	ADH1			1	640bp	none	20.8841					Ref	ADH1			1	640bp	none	21.0319					Ref	ADH1
1	640bp	none	20.0894									1	640bp	none	19.9447									1	640bp	none	20.8944									1	640bp	none	21.0388
1	ADH1	RsaI	18.93	18.9913	0.0138132	0.000727343		Time	Fraction			1	ADH1	RsaI	18.6308	18.7473	0.261845	0.0139671		Time	Fraction			1	ADH1	RsaI	19.7568	19.8272	0.0226582	0.00114279		Time	Fraction			1	ADH1	RsaI	20.0203	20.0787	0.0555314	0.00276568		Time	Fraction
1	ADH1	RsaI	19.0121					0	0			1	ADH1	RsaI	18.9907					0	0			1	ADH1	RsaI	19.8463					0	0			1	ADH1	RsaI	20.1472					0	0
1	ADH1	RsaI	19.0317					1	0.439233			1	ADH1	RsaI	18.6204					1	0.375643			1	ADH1	RsaI	19.8784					1	0.361563			1	ADH1	RsaI	20.0687					1	0.353178
1	640bp	RsaI	22.1033	22.1755	0.0786717	0.00354769		2	0.663546			1	640bp	RsaI	22.2074	22.2448	0.188647	0.00848049		2	0.598566			1	640bp	RsaI	23.0397	23.1607	0.0124686	0.000538352		2	0.735209			1	640bp	RsaI	23.2733	23.5069	0.0266521	0.0011338		2	0.660053
1	640bp	RsaI	22.2672					4	0.579455			1	640bp	RsaI	22.397					4	0.677345			1	640bp	RsaI	23.2123					4	0.725496			1	640bp	RsaI	23.6425					4	0.647993
1	640bp	RsaI	22.1559					6	0.655609			1	640bp	RsaI	22.1302					6	0.633152			1	640bp	RsaI	23.23					6	0.730569			1	640bp	RsaI	23.6048					6	0.59203
2	HOcs	none	26.3833	25.7874	0.0843084	0.00326937						2	HOcs	none	25.6948	25.3109	0.0739324	0.00292097						2	HOcs	none	26.2592	26.082	0.0749926	0.00287527						2	HOcs	none	25.7884	25.7605	0.148753	0.00577444
2	HOcs	none	25.549									2	HOcs	none	25.0666									2	HOcs	none	25.9403									2	HOcs	none	25.6414
2	HOcs	none	25.4298									2	HOcs	none	25.1712									2	HOcs	none	26.0464									2	HOcs	none	25.8518
2	ADH1	none	19.8833	19.3507	0.224802	0.0116172						2	ADH1	none	19.1743	18.8118	0.00302669	0.000160893						2	ADH1	none	20.3708	20.381	0.122016	0.00598675						2	ADH1	none	20.4039	20.3333	0.128799	0.00633437
2	ADH1	none	18.9255									2	ADH1	none	18.6284									2	ADH1	none	20.4723									2	ADH1	none	20.3891
2	ADH1	none	19.2434									2	ADH1	none	18.6327									2	ADH1	none	20.2998									2	ADH1	none	20.207
2	640bp	none	20.7239	20.7342	0.0354671	0.00171056						2	640bp	none	20.5425	20.6325	0.0127126	0.000616146						2	640bp	none	21.8461	21.9087	0.0454253	0.00207339						2	640bp	none	22.0141	22.0378	0.0693747	0.00314799
2	640bp	none	20.7644									2	640bp	none	20.6685									2	640bp	none	21.9078									2	640bp	none	22.0005
2	640bp	none	20.7143									2	640bp	none	20.6865									2	640bp	none	21.9721									2	640bp	none	22.0987
2	ADH1	RsaI	19.0218	19.1904	0.285443	0.0148743						2	ADH1	RsaI	18.6559	18.6398	0.0671531	0.00360266						2	ADH1	RsaI	20.098	20.0415	0.0152282	0.000759832						2	ADH1	RsaI	20.2436	20.3131	0.00974626	0.000479803
2	ADH1	RsaI	19.4765									2	ADH1	RsaI	18.5843									2	ADH1	RsaI	20.024									2	ADH1	RsaI	20.3547
2	ADH1	RsaI	19.0728									2	ADH1	RsaI	18.6793									2	ADH1	RsaI	20.0025									2	ADH1	RsaI	20.3409
2	640bp	RsaI	21.7116	21.7372	0.0243875	0.00112193						2	640bp	RsaI	21.8315	21.7987	0.132032	0.00605687						2	640bp	RsaI	22.4134	22.501	0.011338	0.000503888						2	640bp	RsaI	23.1645	23.222	0.0940692	0.00405086
2	640bp	RsaI	21.7672									2	640bp	RsaI	21.689									2	640bp	RsaI	22.5368									2	640bp	RsaI	23.3173
2	640bp	RsaI	21.7327									2	640bp	RsaI	21.8757									2	640bp	RsaI	22.5528									2	640bp	RsaI	23.1843
4	HOcs	none	26.595	25.821	0.83423	0.0323081						4	HOcs	none	25.0193	25.0543	0.024689	0.000985422						4	HOcs	none	26.3824	26.2214	0.183676	0.00700483						4	HOcs	none	26.158	26.052	0.171044	0.00656547
4	HOcs	none	25.4152									4	HOcs	none	25.0543									4	HOcs	none	26.1227									4	HOcs	none	25.9161
4	HOcs	none	25.453									4	HOcs	none	25.0892									4	HOcs	none	26.159									4	HOcs	none	26.0821
4	ADH1	none	18.6881	18.4923	0.21866	0.0118243						4	ADH1	none	17.9873	18.0585	0.0237156	0.00131327						4	ADH1	none	19.9339	19.9589	0.139767	0.00700274						4	ADH1	none	20.3168	20.2046	0.0454328	0.00224864
4	ADH1	none	18.2399									4	ADH1	none	18.1109									4	ADH1	none	20.0703									4	ADH1	none	20.1806
4	ADH1	none	18.5491									4	ADH1	none	18.0773									4	ADH1	none	19.8726									4	ADH1	none	20.1163
4	640bp	none	21.2325	21.1879	0.0873368	0.00412201						4	640bp	none	20.9011	20.8987	0.134784	0.0064494						4	640bp	none	21.7983	21.7427	0.029554	0.00135926						4	640bp	none	22.0678	22.0676	0.0451374	0.00204542
4	640bp	none	21.2274									4	640bp	none	20.8022									4	640bp	none	21.6941									4	640bp	none	22.0355
4	640bp	none	21.1039									4	640bp	none	20.9929									4	640bp	none	21.7359									4	640bp	none	22.0994
4	ADH1	RsaI	18.775	18.4614	0.010684	0.000578721						4	ADH1	RsaI	18.0391	17.9769	0.154875	0.00861523						4	ADH1	RsaI	19.434	19.523	0.0028233	0.000144614						4	ADH1	RsaI	20.0374	20.0725	0.112224	0.00559092
4	ADH1	RsaI	18.2971									4	ADH1	RsaI	17.8363									4	ADH1	RsaI	19.5656									4	ADH1	RsaI	20.0108
4	ADH1	RsaI	18.3122									4	ADH1	RsaI	18.0553									4	ADH1	RsaI	19.5696									4	ADH1	RsaI	20.1695
4	640bp	RsaI	22.5907	22.5528	0.0458134	0.00203138						4	640bp	RsaI	21.9029	21.8681	0.236154	0.010799						4	640bp	RsaI	22.2432	22.2255	0.0081915	0.000368563						4	640bp	RsaI	23.0911	23.139	0.0662154	0.00286164
4	640bp	RsaI	22.5662									4	640bp	RsaI	21.6838									4	640bp	RsaI	22.2108									4	640bp	RsaI	23.2098
4	640bp	RsaI	22.5014									4	640bp	RsaI	22.0178									4	640bp	RsaI	22.2224									4	640bp	RsaI	23.1161
6	HOcs	none	26.0606	26.4071	0.557229	0.0211015						6	HOcs	none	25.641	25.7046	0.113074	0.00439898						6	HOcs	none	26.5031	26.3342	0.010968	0.000416492						6	HOcs	none	26.3084	26.348	0.01174	0.000445574
6	HOcs	none	26.9744									6	HOcs	none	25.8163									6	HOcs	none	26.2574									6	HOcs	none	26.3761
6	HOcs	none	26.1863									6	HOcs	none	25.6564									6	HOcs	none	26.2419									6	HOcs	none	26.3595
6	ADH1	none	18.5489	18.5046	0.069105	0.00373447						6	ADH1	none	18.036	18.0887	0.240553	0.0132985						6	ADH1	none	19.5908	19.635	0.150215	0.00765036						6	ADH1	none	20.065	20.2551	0.348302	0.0171958
6	ADH1	none	18.54									6	ADH1	none	17.8788									6	ADH1	none	19.8023									6	ADH1	none	20.0432
6	ADH1	none	18.425									6	ADH1	none	18.3512									6	ADH1	none	19.5118									6	ADH1	none	20.6571
6	640bp	none	21.2328	21.3599	0.199475	0.00933874						6	640bp	none	21.1758	21.0942	0.243612	0.0115488						6	640bp	none	21.4948	21.4231	0.142856	0.00666829						6	640bp	none	21.8713	21.7697	0.292234	0.0134238
6	640bp	none	21.5646									6	640bp	none	20.8811									6	640bp	none	21.2863									6	640bp	none	21.5123
6	640bp	none	21.2825									6	640bp	none	21.2256									6	640bp	none	21.4883									6	640bp	none	21.9256
6	ADH1	RsaI	18.1384	18.1354	0.00900405	0.00049649						6	ADH1	RsaI	17.5512	17.8089	0.138836	0.00779587						6	ADH1	RsaI	19.0254	19.147	0.0204365	0.00106735						6	ADH1	RsaI	19.6621	19.8564	0.144704	0.00728753
6	ADH1	RsaI	18.1275									6	ADH1	RsaI	18.0358									6	ADH1	RsaI	19.2222									6	ADH1	RsaI	20.0559
6	ADH1	RsaI	18.1403									6	ADH1	RsaI	17.8395									6	ADH1	RsaI	19.1933									6	ADH1	RsaI	19.8512
6	640bp	RsaI	21.9069	22.0972	0.0422713	0.00191297						6	640bp	RsaI	21.9866	21.9899	0.0373884	0.00170026						6	640bp	RsaI	21.705	21.814	0.0938678	0.00430309						6	640bp	RsaI	22.6543	22.7433	0.160125	0.00704054
6	640bp	RsaI	22.2222									6	640bp	RsaI	21.9651									6	640bp	RsaI	21.9349									6	640bp	RsaI	22.9011
6	640bp	RsaI	22.1625									6	640bp	RsaI	22.018									6	640bp	RsaI	21.8022									6	640bp	RsaI	22.6746

## Sheet: rad24 exo1 sgs1 1.3 kb & 2.5 kb
Biological Replicate 1															Biological Replicate 2															Biological Replicate 3
Time	Amplicon	Digest	Cq	Mean	SD	COV		Primer Efficiencies							Time	Amplicon	Digest	Cq	Mean	SD	COV		Primer Efficiencies							Time	Amplicon	Digest	Cq	Mean	SD	COV		Primer Efficiencies
0	ADH1	none	18.1555	18.1877	0.0383434	0.0021082		ADH1	1.98						0	ADH1	none	19.9943	20.0103	0.0296413	0.0014813		ADH1	1.98						0	ADH1	none	20.2447	20.2573	0.0213405	0.00105347		ADH1	1.98
0	ADH1	none	18.2301					RsaIcs +1.3kb	2.02						0	ADH1	none	19.9921					RsaIcs +1.3kb	2.02						0	ADH1	none	20.2453					RsaIcs +1.3kb	2.02
0	ADH1	none	18.1776					RsaIcs +2.5kb	2		Calculate HOcs Cut Fraction				0	ADH1	none	20.0445					RsaIcs +2.5kb	2		Calculate HOcs Cut Fraction				0	ADH1	none	20.282					RsaIcs +2.5kb	2		Calculate HOcs Cut Fraction
0	1.3kb	none	19.7219	19.6119	0.12553	0.00640071									0	1.3kb	none	21.5315	21.6125	0.421187	0.0194881									0	1.3kb	none	21.5676	21.5237	0.0413008	0.00191885
0	1.3kb	none	19.4751					Calculate resected fraction			Cut	HOcs			0	1.3kb	none	21.2376					Calculate resected fraction			Cut	HOcs			0	1.3kb	none	21.5179					Calculate resected fraction			Cut	HOcs
0	1.3kb	none	19.6387								Ref	ADH1			0	1.3kb	none	22.0682								Ref	ADH1			0	1.3kb	none	21.4856								Ref	ADH1
0	2.5kb	none	18.9618	18.847	0.153643	0.00815213		Cut	1.3kb						0	2.5kb	none	20.662	20.7038	0.0654794	0.00316268		Cut	1.3kb						0	2.5kb	none	20.8463	20.7973	0.129247	0.00621461		Cut	1.3kb
0	2.5kb	none	18.6725					Ref	ADH1		Time	Fraction			0	2.5kb	none	20.6701					Ref	ADH1		Time	Fraction			0	2.5kb	none	20.6507					Ref	ADH1		Time	Fraction
0	2.5kb	none	18.9068								0	0			0	2.5kb	none	20.7793								0	0			0	2.5kb	none	20.8948								0	0
0	ADH1	RsaI	18.0716	18.2172	0.126961	0.0069693		Time	Fraction		1	0.783244			0	ADH1	RsaI	20.1348	19.8108	0.458202	0.0231289		Time	Fraction		1	0.783244			0	ADH1	RsaI	20.1824	20.1973	0.0766846	0.00379677		Time	Fraction		1	0.783244
0	ADH1	RsaI	18.3046					0	0		2	0.85086			0	ADH1	RsaI						0	0		2	0.85086			0	ADH1	RsaI	20.2804					0	0		2	0.85086
0	ADH1	RsaI	18.2755					1	0.00856133		4	0.883376			0	ADH1	RsaI	19.4868					1	0.0162272		4	0.883376			0	ADH1	RsaI	20.1293					1	0.0131063		4	0.883376
0	1.3kb	RsaI	25.2016	25.1316	0.150762	0.0059989		2	0.0369898		6	0.936741			0	1.3kb	RsaI	25.7078	25.6537	0.0654337	0.00255065		2	0.0571616		6	0.936741			0	1.3kb	RsaI	27.1455	27.1353	0.137384	0.00506292		2	0.0526708		6	0.936741
0	1.3kb	RsaI	25.2347					4	0.147562						0	1.3kb	RsaI	25.581					4	0.201077						0	1.3kb	RsaI	27.2673					4	0.185933
0	1.3kb	RsaI	24.9586					6	0.367872						0	1.3kb	RsaI	25.6723					6	0.328453						0	1.3kb	RsaI	26.9931					6	0.337176
0	2.5kb	RsaI		24.6809	#DIV/0!	#DIV/0!									0	2.5kb	RsaI	25.2128	25.1586	0.181949	0.00723208									0	2.5kb	RsaI	26.4195	26.4663	0.0484736	0.00183152
0	2.5kb	RsaI						Calculate resected fraction							0	2.5kb	RsaI	25.3073					Calculate resected fraction							0	2.5kb	RsaI	26.4632					Calculate resected fraction
0	2.5kb	RsaI	24.6809												0	2.5kb	RsaI	24.9557												0	2.5kb	RsaI	26.5163
1	ADH1	none	17.8255	18.0399	0.242966	0.0134682		Cut	2.5kb						1	ADH1	none	19.3285	19.3432	0.0127372	0.000658488		Cut	2.5kb						1	ADH1	none	20.517	20.5397	0.0465173	0.00226475		Cut	2.5kb
1	ADH1	none	18.3038					Ref	ADH1						1	ADH1	none	19.3495					Ref	ADH1						1	ADH1	none	20.509					Ref	ADH1
1	ADH1	none	17.9904												1	ADH1	none	19.3515												1	ADH1	none	20.5933
1	1.3kb	none	19.1921	19.1221	0.2203	0.0115207		Time	Fraction						1	1.3kb	none	20.5008	20.545	0.0890497	0.00433437		Time	Fraction						1	1.3kb	none	21.2838	21.3103	0.113565	0.00532912		Time	Fraction
1	1.3kb	none	18.8753					0	0						1	1.3kb	none	20.4868					0	0						1	1.3kb	none	21.2124					0	0
1	1.3kb	none	19.2988					1	0.00498042						1	1.3kb	none	20.6475					1	0.0111997						1	1.3kb	none	21.4348					1	0.00860195
1	2.5kb	none	18.2056	18.3749	0.168264	0.00915728		2	0.00750376						1	2.5kb	none	19.8755	19.9378	0.078573	0.0039409		2	0.0177499						1	2.5kb	none	20.6314	20.6307	0.0152657	0.000739948		2	0.0116496
1	2.5kb	none	18.3771					4	0.0258264						1	2.5kb	none	19.9119					4	0.0331135						1	2.5kb	none	20.6151					4	0.0307185
1	2.5kb	none	18.5421					6	0.153752						1	2.5kb	none	20.0261					6	0.049003						1	2.5kb	none	20.6456					6	0.0674751
1	ADH1	RsaI	17.7678	17.9581	0.165422	0.00921156									1	ADH1	RsaI	19.4162	19.5357	0.119876	0.00613623									1	ADH1	RsaI	20.5478	20.5945	0.0713065	0.00346241
1	ADH1	RsaI	18.0394												1	ADH1	RsaI	19.535												1	ADH1	RsaI	20.5591
1	ADH1	RsaI	18.0672												1	ADH1	RsaI	19.6559												1	ADH1	RsaI	20.6766
1	1.3kb	RsaI	26.509	26.4439	0.066992	0.00253336									1	1.3kb	RsaI	27.2282	27.2169	0.182608	0.00670933									1	1.3kb	RsaI	28.2304	28.1551	0.147515	0.00523937
1	1.3kb	RsaI	26.4477												1	1.3kb	RsaI	27.3937												1	1.3kb	RsaI	28.2497
1	1.3kb	RsaI	26.3751												1	1.3kb	RsaI	27.029												1	1.3kb	RsaI	27.9851
1	2.5kb	RsaI	26.3919	26.5868	0.169015	0.00635712									1	2.5kb	RsaI	27.1797	27.2452	0.0702127	0.00257707									1	2.5kb	RsaI	28.1508	28.1854	0.0679297	0.0024101
1	2.5kb	RsaI	26.6938												1	2.5kb	RsaI	27.2364												1	2.5kb	RsaI	28.1417
1	2.5kb	RsaI	26.6747												1	2.5kb	RsaI	27.3193												1	2.5kb	RsaI	28.2636
2	ADH1	none	17.972	18.0585	0.166297	0.00920882									2	ADH1	none	19.5606	19.5174	0.0642345	0.00329114									2	ADH1	none	19.9299	19.9341	0.06035	0.00302747
2	ADH1	none	18.2502												2	ADH1	none	19.4436												2	ADH1	none	19.9964
2	ADH1	none	17.9533												2	ADH1	none	19.548												2	ADH1	none	19.876
2	1.3kb	none	19.2541	19.187	0.0583103	0.00303905									2	1.3kb	none	20.8347	20.7505	0.112795	0.00543578									2	1.3kb	none	20.9302	20.8519	0.073195	0.00351024
2	1.3kb	none	19.1481												2	1.3kb	none	20.6224												2	1.3kb	none	20.8401
2	1.3kb	none	19.1589												2	1.3kb	none	20.7945												2	1.3kb	none	20.7853
2	2.5kb	none	18.4328	18.4494	0.107632	0.00583389									2	2.5kb	none	20.015	20.0134	0.00186333	9.31042e-05									2	2.5kb	none	20.1755	20.1466	0.0601858	0.00298739
2	2.5kb	none	18.3511												2	2.5kb	none	20.0138												2	2.5kb	none	20.0774
2	2.5kb	none	18.5644												2	2.5kb	none	20.0114												2	2.5kb	none	20.187
2	ADH1	RsaI	17.972	17.979	0.0842427	0.00468563									2	ADH1	RsaI	19.5105	19.6121	0.119409	0.00608853									2	ADH1	RsaI	19.9793	19.9531	0.074313	0.00372439
2	ADH1	RsaI	18.0664												2	ADH1	RsaI	19.7436												2	ADH1	RsaI	19.8692
2	ADH1	RsaI	17.8984												2	ADH1	RsaI	19.5821												2	ADH1	RsaI	20.0107
2	1.3kb	RsaI	24.4603	24.524	0.0994691	0.00405598									2	1.3kb	RsaI	25.6663	25.6204	0.0600406	0.00234347									2	1.3kb	RsaI	25.8278	25.7685	0.0587289	0.0022791
2	1.3kb	RsaI	24.6387												2	1.3kb	RsaI	25.6425												2	1.3kb	RsaI	25.7673
2	1.3kb	RsaI	24.4732												2	1.3kb	RsaI	25.5525												2	1.3kb	RsaI	25.7103
2	2.5kb	RsaI	25.7569	26.1898	0.402497	0.0153685									2	2.5kb	RsaI	26.7023	26.6746	0.171255	0.00642015									2	2.5kb	RsaI	27.1167	27.346	0.212259	0.007762
2	2.5kb	RsaI	26.5527												2	2.5kb	RsaI	26.8303												2	2.5kb	RsaI	27.5356
2	2.5kb	RsaI	26.2598												2	2.5kb	RsaI	26.4912												2	2.5kb	RsaI	27.3857
4	ADH1	none	17.6443	17.7246	0.209245	0.0118053									4	ADH1	none	19.8743	19.8787	0.0349068	0.00175599									4	ADH1	none	20.0241	19.9503	0.0663392	0.00332522
4	ADH1	none	17.9621												4	ADH1	none	19.8461												4	ADH1	none	19.9314
4	ADH1	none	17.5674												4	ADH1	none	19.9155												4	ADH1	none	19.8955
4	1.3kb	none	19.4803	19.5409	0.0525829	0.00269092									4	1.3kb	none	21.4616	21.5048	0.106674	0.00496045									4	1.3kb	none	21.466	21.4391	0.0432923	0.00201932
4	1.3kb	none	19.5678												4	1.3kb	none	21.4266												4	1.3kb	none	21.3891
4	1.3kb	none	19.5745												4	1.3kb	none	21.6263												4	1.3kb	none	21.4621
4	2.5kb	none	18.3243	18.4097	0.0790771	0.00429539									4	2.5kb	none	20.5295	20.5923	0.117076	0.00568542									4	2.5kb	none	20.5643	20.5798	0.121742	0.00591558
4	2.5kb	none	18.4245												4	2.5kb	none	20.5201												4	2.5kb	none	20.7085
4	2.5kb	none	18.4804												4	2.5kb	none	20.7274												4	2.5kb	none	20.4665
4	ADH1	RsaI	17.5668	17.5922	0.104412	0.00593513									4	ADH1	RsaI	19.9731	19.9174	0.0693405	0.00348141									4	ADH1	RsaI	19.9979	19.9182	0.117184	0.00588326
4	ADH1	RsaI	17.5028												4	ADH1	RsaI	19.8397												4	ADH1	RsaI	19.7836
4	ADH1	RsaI	17.7069												4	ADH1	RsaI	19.9393												4	ADH1	RsaI	19.973
4	1.3kb	RsaI	22.3814	22.8191	1.18005	0.0517133									4	1.3kb	RsaI	24.3101	24.4615	0.141204	0.00577248									4	1.3kb	RsaI	24.4121	24.4519	0.0971091	0.00397143
4	1.3kb	RsaI	24.1555												4	1.3kb	RsaI	24.5896												4	1.3kb	RsaI	24.5626
4	1.3kb	RsaI	21.9205												4	1.3kb	RsaI	24.4848												4	1.3kb	RsaI	24.3811
4	2.5kb	RsaI	24.118	24.3541	0.20442	0.00839366									4	2.5kb	RsaI	26.4933	26.3407	0.139394	0.00529198									4	2.5kb	RsaI	26.31	26.3686	0.0601428	0.00228084
4	2.5kb	RsaI	24.4753												4	2.5kb	RsaI	26.3087												4	2.5kb	RsaI	26.4302
4	2.5kb	RsaI	24.4688												4	2.5kb	RsaI	26.2201												4	2.5kb	RsaI	26.3657
6	ADH1	none	17.2514	17.3008	0.140821	0.00813954									6	ADH1	none	19.3716	19.4132	0.0621369	0.00320076									6	ADH1	none	21.3236	21.2425	0.0950608	0.00447503
6	ADH1	none	17.1913												6	ADH1	none	19.3833												6	ADH1	none	21.1379
6	ADH1	none	17.4597												6	ADH1	none	19.4846												6	ADH1	none	21.266
6	1.3kb	none	19.7109	19.7615	0.12115	0.00613058									6	1.3kb	none	21.2824	21.4219	0.233658	0.0109074									6	1.3kb	none	23.1291	23.0206	0.128052	0.0055625
6	1.3kb	none	19.6739												6	1.3kb	none	21.2916												6	1.3kb	none	22.8794
6	1.3kb	none	19.8998												6	1.3kb	none	21.6916												6	1.3kb	none	23.0534
6	2.5kb	none	18.5121	18.5293	0.118935	0.00641874									6	2.5kb	none	20.3602	20.4209	0.0714096	0.00349689									6	2.5kb	none	22.0098	22.0458	0.213778	0.009697
6	2.5kb	none	18.4198												6	2.5kb	none	20.4029												6	2.5kb	none	22.2753
6	2.5kb	none	18.6558												6	2.5kb	none	20.4996												6	2.5kb	none	21.8523
6	ADH1	RsaI	17.0438	17.2361	0.205536	0.0119247									6	ADH1	RsaI	19.3874	19.4731	0.081903	0.00420597									6	ADH1	RsaI	21.1638	21.2273	0.0644067	0.00303415
6	ADH1	RsaI	17.4527												6	ADH1	RsaI	19.5506												6	ADH1	RsaI	21.2925
6	ADH1	RsaI	17.2118												6	ADH1	RsaI	19.4812												6	ADH1	RsaI	21.2256
6	1.3kb	RsaI	21.7169	21.703	0.246446	0.0113554									6	1.3kb	RsaI	23.8178	23.6823	0.145641	0.00614977									6	1.3kb	RsaI	25.372	25.1628	0.18827	0.0074821
6	1.3kb	RsaI	21.9422												6	1.3kb	RsaI	23.7009												6	1.3kb	RsaI	25.1091
6	1.3kb	RsaI	21.4499												6	1.3kb	RsaI	23.5283												6	1.3kb	RsaI	25.0072
6	2.5kb	RsaI	21.66	21.949	0.254601	0.0115996									6	2.5kb	RsaI	25.675	25.6984	0.0672538	0.00261705									6	2.5kb	RsaI	26.5956	26.7731	0.173229	0.00647028
6	2.5kb	RsaI	22.0469												6	2.5kb	RsaI	25.7742												6	2.5kb	RsaI	26.7818
6	2.5kb	RsaI	22.1402												6	2.5kb	RsaI	25.6459												6	2.5kb	RsaI	26.9418

## Sheet: rad24 exo1 sgs1 640bp
Biological Replicate 1												Biological Replicate 1, Technical Replicate 2												Biological replicate 2												Biological Replicate 3
Time	Amplicon	Digest	Cq	Mean	SD	COV		Primer Efficiencies				Time	Amplicon	Digest	Cq	Mean	SD	COV		Primer Efficiencies				Time	Amplicon	Digest	Cq	Mean	SD	COV		Primer Efficiencies				Time	Amplicon	Digest	Cq	Mean	SD	COV		Primer Efficiencies
0	HOcs	none	21.204	20.7404	0.0868025	0.0041852		HOcs	2.01			0	HOcs	none	20.72	20.38	0.0527319	0.00258779		HOcs	2.01			0	HOcs	none	22.2175	22.236	0.0173747	0.000781377		HOcs	2.01			0	HOcs	none	21.8086	21.7068	0.081869	0.00377158		HOcs	2.01
0	HOcs	none	20.8017					ADH1	1.98			0	HOcs	none	20.41					ADH1	1.98			0	HOcs	none	22.2237					ADH1	1.98			0	HOcs	none	21.7647					ADH1	1.98
0	HOcs	none	20.679					640bp	1.96			0	HOcs	none	20.34					640bp	1.96			0	HOcs	none	22.2483					640bp	1.96			0	HOcs	none	21.6489					640bp	1.96
0	ADH1	none	18.8656	18.7835	0.0978531	0.00520953						0	ADH1	none	18.44	18.49	0.0126329	0.00068309						0	ADH1	none	20.2327	20.2563	0.0215568	0.0010642						0	ADH1	none	19.676	19.7914	0.0659823	0.00333388
0	ADH1	none	18.8116					Calculate HOcs Cut Fraction				0	ADH1	none	18.53					Calculate HOcs Cut Fraction				0	ADH1	none	20.2833					Calculate HOcs Cut Fraction				0	ADH1	none	19.8958					Calculate HOcs Cut Fraction
0	ADH1	none	18.6732									0	ADH1	none	18.51									0	ADH1	none	20.2528									0	ADH1	none	19.8025
0	640bp	none	19.6563	19.646	0.0903529	0.00459904		Cut	HOcs			0	640bp	none	19.45	19.42	0.0975078	0.00502144		Cut	HOcs			0	640bp	none	21.2399	21.3071	0.153265	0.00719317		Cut	HOcs			0	640bp	none	20.8842	20.9356	0.177617	0.00848395		Cut	HOcs
0	640bp	none	19.577					Ref	ADH1			0	640bp	none	19.34					Ref	ADH1			0	640bp	none	21.2323					Ref	ADH1			0	640bp	none	20.8357					Ref	ADH1
0	640bp	none	19.7048									0	640bp	none	19.47									0	640bp	none	21.4491									0	640bp	none	21.0869
0	ADH1	RsaI	18.6387	18.6575	0.139225	0.00746217		Time	Fraction			0	ADH1	RsaI	18.42	18.24	0.188944	0.0103585		Time	Fraction			0	ADH1	RsaI	20.0355	20.1056	0.0768669	0.00382315		Time	Fraction			0	ADH1	RsaI	19.6592	19.8191	0.144567	0.00729433		Time	Fraction
0	ADH1	RsaI	18.4418					0	0			0	ADH1	RsaI	18.15					0	0			0	ADH1	RsaI	20.1442					0	0			0	ADH1	RsaI	19.8636					0	0
0	ADH1	RsaI	18.8919					1	0.797487			0	ADH1	RsaI	18.15					1	0.783244			0	ADH1	RsaI	20.1372					1	0.745585			0	ADH1	RsaI	19.9345					1	0.736988
0	640bp	RsaI	25.9515	26.0534	0.00507015	0.000194606		2	0.833252			0	640bp	RsaI	25.54	25.49	0.128752	0.00505114		2	0.85086			0	640bp	RsaI	25.5921	25.5014	0.113865	0.00446506		2	0.805726			0	640bp	RsaI	27.0008	27.0993	0.107748	0.00397605		2	0.825392
0	640bp	RsaI	26.1079					4	0.863719			0	640bp	RsaI	25.56					4	0.883376			0	640bp	RsaI	25.5365					4	0.82489			0	640bp	RsaI	27.2247					4	0.84852
0	640bp	RsaI	26.1007					6	0.918694			0	640bp	RsaI	25.37					6	0.936741			0	640bp	RsaI	25.3755					6	0.869517			0	640bp	RsaI	27.0724					6	0.888417
1	HOcs	none	23.2488	22.9753	0.0654194	0.00284737						1	HOcs	none	22.57	22.37	0.00529661	0.00023678						1	HOcs	none	23.8323	23.7083	0.0402413	0.00169735						1	HOcs	none	24.1415	24.0762	0.13428	0.0055773
1	HOcs	none	23.0216									1	HOcs	none	22.37									1	HOcs	none	23.7367									1	HOcs	none	23.9486
1	HOcs	none	22.9291									1	HOcs	none	22.37									1	HOcs	none	23.6798									1	HOcs	none	24.1385
1	ADH1	none	18.7979	18.7299	0.121171	0.00646939						1	ADH1	none	18.35	18.29	0.039925	0.00218269						1	ADH1	none	19.7304	19.7572	0.0991838	0.00502015						1	ADH1	none	20.21	20.2579	0.135093	0.00666868
1	ADH1	none	18.6266					Calculate Resected Fraction				1	ADH1	none	18.29					Calculate Resected Fraction				1	ADH1	none	19.8707					Calculate Resected Fraction				1	ADH1	none	20.4011					Calculate Resected Fraction
1	ADH1	none	18.7651									1	ADH1	none	18.23									1	ADH1	none	19.6704									1	ADH1	none	20.1626
1	640bp	none	19.5433	19.4991	0.0264853	0.00135829		Cut	640bp			1	640bp	none	19.04	19.07	0.113851	0.00597097		Cut	640bp			1	640bp	none	20.6879	20.6976	0.086334	0.0041712		Cut	640bp			1	640bp	none	20.8374	20.8991	0.0426173	0.0020392		Cut	640bp
1	640bp	none	19.4957					Ref	ADH1			1	640bp	none	19					Ref	ADH1			1	640bp	none	20.6414					Ref	ADH1			1	640bp	none	20.9601					Ref	ADH1
1	640bp	none	19.4582									1	640bp	none	19.16									1	640bp	none	20.7635									1	640bp	none	20.8998
1	ADH1	RsaI	18.5405	18.5949	0.0792779	0.00426342		Time	Fraction			1	ADH1	RsaI	18.21	18.2	0.0319762	0.00175681		Time	Fraction			1	ADH1	RsaI	19.2927	19.3993	0.0210883	0.00108707		Time	Fraction			1	ADH1	RsaI	20.2409	20.2982	0.0523526	0.00257917		Time	Fraction
1	ADH1	RsaI	18.5661					0	0			1	ADH1	RsaI	18.22					0	0			1	ADH1	RsaI	19.4376					0	0			1	ADH1	RsaI	20.2899					0	0
1	ADH1	RsaI	18.6782					1	0.153523			1	ADH1	RsaI	18.17					1	0.1532			1	ADH1	RsaI	19.4675					1	0.252115			1	ADH1	RsaI	20.364					1	0.15573
1	640bp	RsaI	23.3963	23.4191	0.0525892	0.00224557		2	0.493392			1	640bp	RsaI	22.99	23.06	0.0606978	0.00263164		2	0.531612			1	640bp	RsaI	23.6091	23.7015	0.00508607	0.000214589		2	0.663066			1	640bp	RsaI	24.9937	25.0992	0.0163929	0.000653125		2	0.487886
1	640bp	RsaI	23.3933					4	0.589544			1	640bp	RsaI	23.15					4	0.679052			1	640bp	RsaI	23.7512					4	0.850649			1	640bp	RsaI	25.1635					4	0.655883
1	640bp	RsaI	23.4677					6	0.570607			1	640bp	RsaI	23.06					6	0.66447			1	640bp	RsaI	23.744					6	0.818279			1	640bp	RsaI	25.1403					6	0.6781
2	HOcs	none	23.3631	23.2611	0.0286365	0.00123109						2	HOcs	none	23.05	22.77	0.0234179	0.00102867						2	HOcs	none	24.2153	24.3263	0.0832724	0.00342315						2	HOcs	none	24.1922	24.2748	0.0955906	0.00393785
2	HOcs	none	23.1898									2	HOcs	none	22.61									2	HOcs	none	24.3229									2	HOcs	none	24.2485
2	HOcs	none	23.2303									2	HOcs	none	22.64									2	HOcs	none	24.4406									2	HOcs	none	24.3837
2	ADH1	none	18.8093	18.7374	0.0143411	0.000765369						2	ADH1	none	18.25	18.15	0.0276756	0.00152493						2	ADH1	none	19.9952	19.9939	0.00507897	0.000254026						2	ADH1	none	19.7901	19.8611	0.166431	0.00837975
2	ADH1	none	18.6914									2	ADH1	none	18.08									2	ADH1	none	19.9897									2	ADH1	none	20.0143
2	ADH1	none	18.7116									2	ADH1	none	18.12									2	ADH1	none	19.9969									2	ADH1	none	19.7789
2	640bp	none	19.796	19.8078	0.0379833	0.00191759						2	640bp	none	19.39	19.48	0.188629	0.00968293						2	640bp	none	21.3639	21.3121	0.00403777	0.000189459						2	640bp	none	21.2654	21.2348	0.198881	0.0093658
2	640bp	none	19.7869									2	640bp	none	19.39									2	640bp	none	21.2891									2	640bp	none	21.3601
2	640bp	none	19.8406									2	640bp	none	19.66									2	640bp	none	21.2834									2	640bp	none	21.0789
2	ADH1	RsaI	19.0162	18.6851	0.0371562	0.00198855						2	ADH1	RsaI	18.19	18.23	0.0703575	0.00385999						2	ADH1	RsaI	19.3646	19.6916	0.15563	0.0079034						2	ADH1	RsaI	19.5793	19.9358	0.0510897	0.00256271
2	ADH1	RsaI	18.5458									2	ADH1	RsaI	18.3									2	ADH1	RsaI	19.9651									2	ADH1	RsaI	20.1503
2	ADH1	RsaI	18.4933									2	ADH1	RsaI	18.2									2	ADH1	RsaI	19.745									2	ADH1	RsaI	20.078
2	640bp	RsaI	21.6569	21.7636	0.00750677	0.000344923						2	640bp	RsaI	21.26	21.39	0.107149	0.00500969						2	640bp	RsaI	22.5076	22.505	0.0743323	0.00330292						2	640bp	RsaI	23.291	23.3582	0.0460886	0.00197312
2	640bp	RsaI	21.8223									2	640bp	RsaI	21.38									2	640bp	RsaI	22.4511									2	640bp	RsaI	23.3592
2	640bp	RsaI	21.8117									2	640bp	RsaI	21.53									2	640bp	RsaI	22.5562									2	640bp	RsaI	23.4244
4	HOcs	none	23.1086	23.2627	0.185079	0.00795606						4	HOcs	none	23.01	23.02	0.0328917	0.00142882						4	HOcs	none	24.8484	25.0142	0.196703	0.00786364						4	HOcs	none	24.5077	24.6314	0.210339	0.00853946
4	HOcs	none	23.3703									4	HOcs	none	23.06									4	HOcs	none	25.1266									4	HOcs	none	24.8052
4	HOcs	none	23.309									4	HOcs	none	22.99									4	HOcs	none	25.0677									4	HOcs	none	24.5813
4	ADH1	none	18.3472	18.4437	0.000270401	1.46609e-05						4	ADH1	none	18.21	18.05	0.129184	0.00715727						4	ADH1	none	20.458	20.545	0.0808484	0.00393519						4	ADH1	none	19.9772	20.0176	0.0977074	0.00488108
4	ADH1	none	18.4921									4	ADH1	none	17.88									4	ADH1	none	20.5313									4	ADH1	none	20.1068
4	ADH1	none	18.4917									4	ADH1	none	18.06									4	ADH1	none	20.6457									4	ADH1	none	19.9687
4	640bp	none	20.3053	20.1629	0.0752938	0.00373428						4	640bp	none	19.88	19.89	0.168407	0.00846641						4	640bp	none	22.1229	22.1649	0.104314	0.00470624						4	640bp	none	21.6666	21.7559	0.141176	0.00648912
4	640bp	none	20.0384									4	640bp	none	19.78									4	640bp	none	22.1122									4	640bp	none	21.7007
4	640bp	none	20.1449									4	640bp	none	20.01									4	640bp	none	22.2597									4	640bp	none	21.9003
4	ADH1	RsaI	18.1161	18.1568	0.0269205	0.00148267						4	ADH1	RsaI	18.14	18.09	0.030877	0.00170697						4	ADH1	RsaI	20.0313	20.04	0.0811474	0.00404927						4	ADH1	RsaI	20.2569	20.3005	0.0344354	0.00169628
4	ADH1	RsaI	18.1581									4	ADH1	RsaI	18.04									4	ADH1	RsaI	20.1017									4	ADH1	RsaI	20.298
4	ADH1	RsaI	18.1961									4	ADH1	RsaI	18.09									4	ADH1	RsaI	19.987									4	ADH1	RsaI	20.3467
4	640bp	RsaI	21.4485	21.468	0.0925052	0.00430899						4	640bp	RsaI	21.15	21.19	0.00073465	3.4668e-05						4	640bp	RsaI	22.5817	22.5667	0.148547	0.00658257						4	640bp	RsaI	23.4079	23.4594	0.0773897	0.00329889
4	640bp	RsaI	21.5431									4	640bp	RsaI	21.21									4	640bp	RsaI	22.6643									4	640bp	RsaI	23.4304
4	640bp	RsaI	21.4123									4	640bp	RsaI	21.21									4	640bp	RsaI	22.4542									4	640bp	RsaI	23.5398
6	HOcs	none	23.6691	23.6132	0.0967371	0.00409675						6	HOcs	none	23.81	23.39	0.150234	0.00642311						6	HOcs	none	25.0667	25.073	0.0337574	0.00134637						6	HOcs	none	25.368	25.1754	0.0932557	0.00370424
6	HOcs	none	23.5168									6	HOcs	none	23.29									6	HOcs	none	25.0523									6	HOcs	none	25.145
6	HOcs	none	23.6536									6	HOcs	none	23.08									6	HOcs	none	25.1									6	HOcs	none	25.0132
6	ADH1	none	18.3023	18.0458	0.26102	0.0144643						6	ADH1	none	17.56	17.53	0.0219891	0.00125427						6	ADH1	none	20.0837	20.1744	0.0830138	0.00411481						6	ADH1	none	19.9882	20.1261	0.119452	0.00593518
6	ADH1	none	17.7804									6	ADH1	none	17.51									6	ADH1	none	20.2466									6	ADH1	none	20.1915
6	ADH1	none	18.0547									6	ADH1	none	17.53									6	ADH1	none	20.1928									6	ADH1	none	20.1985
6	640bp	none	20.3812	20.3486	0.151612	0.00745072						6	640bp	none	20.1	20.13	0.06268	0.003113						6	640bp	none	22.0545	22.1041	0.0549753	0.00248711						6	640bp	none	22.0568	22.0906	0.0829813	0.0037564
6	640bp	none	20.2251									6	640bp	none	20.11									6	640bp	none	22.09									6	640bp	none	22.0489
6	640bp	none	20.4395									6	640bp	none	20.19									6	640bp	none	22.1677									6	640bp	none	22.1662
6	ADH1	RsaI	18.3232	17.8554	0.00576958	0.000323129						6	ADH1	RsaI	17.52	17.54	0.01802	0.00102714						6	ADH1	RsaI	19.584	19.6774	0.0137661	0.000699589						6	ADH1	RsaI	20.2372	20.4219	0.0152734	0.000747891
6	ADH1	RsaI	17.6255									6	ADH1	RsaI	17.54									6	ADH1	RsaI	19.7144									6	ADH1	RsaI	20.5251
6	ADH1	RsaI	17.6174									6	ADH1	RsaI	17.57									6	ADH1	RsaI	19.7338									6	ADH1	RsaI	20.5035
6	640bp	RsaI	21.6207	21.6934	0.0475864	0.00219359						6	640bp	RsaI	21.27	21.33	0.00277565	0.00013014						6	640bp	RsaI	22.5415	22.482	0.2149	0.00955874						6	640bp	RsaI	23.8878	23.6415	0.00190354	8.0517e-05
6	640bp	RsaI	21.6961									6	640bp	RsaI	21.35									6	640bp	RsaI	22.6042									6	640bp	RsaI	23.5196
6	640bp	RsaI	21.7633									6	640bp	RsaI	21.36									6	640bp	RsaI	22.3003									6	640bp	RsaI	23.5169

## Sheet: rad9 640 bp
Biological Replicate 1															Biological Replicate 2															Biological Replicate 3
Time	Amplicon	Digest	Cq	Mean	SD	COV		Primer efficiencies							Time	Amplicon	Digest	Cq	Mean	SD	COV		Primer efficiencies							Time	Amplicon	Digest	Cq	Mean	SD	COV		Primer efficiencies
0	HOcs	none	21.2211	21.0815	0.122639	0.00581738		HOcs	2.01						0	HOcs	none	20.3738	20.0007	0.353932	0.017696		HOcs	2.01						0	HOcs	none	20.178	19.9341	0.260247	0.0130554		HOcs	2.01
0	HOcs	none	21.0321					ADH1	1.98						0	HOcs	none	19.9586					ADH1	1.98						0	HOcs	none	19.9642					ADH1	1.98
0	HOcs	none	20.9912					640bp	1.96						0	HOcs	none	19.6697					640bp	1.96						0	HOcs	none	19.6602					640bp	1.96
0	ADH1	none	19.3083	19.3108	0.0872421	0.0045178									0	ADH1	none	18.1434	18.1725	0.0696678	0.00383369									0	ADH1	none	18.1116	18.0302	0.0828691	0.00459613		5kb	2.01
0	ADH1	none	19.3992												0	ADH1	none	18.252												0	ADH1	none	18.0331					10kb	2.04
0	ADH1	none	19.2248												0	ADH1	none	18.1221												0	ADH1	none	17.9459
0	640bp	none	20.4223	20.3809	0.0371332	0.00182196		Calculate HOcs cut fraction							0	640bp	none	19.44	19.2956	0.130968	0.00678743		Calculate HOcs cut fraction							0	640bp	none	19.1465	19.1077	0.0469252	0.00245583		Calculate HOcs cut fraction
0	640bp	none	20.3697												0	640bp	none	19.2622												0	640bp	none	19.121
0	640bp	none	20.3506					Cut	HOcs						0	640bp	none	19.1846					Cut	HOcs						0	640bp	none	19.0555					Cut	HOcs
0	640bp	RsaI	26.9207	26.8031	0.217571	0.00811738		Ref	ADH1						0	640bp	RsaI	25.6695	25.6059	0.160508	0.00626842		Ref	ADH1						0	640bp	RsaI	24.3086	24.3635	0.0611206	0.0025087		Ref	ADH1
0	640bp	RsaI	26.5521												0	640bp	RsaI	25.7248												0	640bp	RsaI	24.3525
0	640bp	RsaI	26.9366					Time	Fraction						0	640bp	RsaI	25.4233					Time	Fraction						0	640bp	RsaI	24.4293					Time	Fraction
1	HOcs	none	26.5923	26.6948	0.142748	0.00534739		0	0						1	HOcs	none	25.6613	25.4682	0.170777	0.00670551		0	0						1	HOcs	none	25.2043	24.9899	0.188148	0.00752897		0	0
1	HOcs	none	26.8579					1	0.975481						1	HOcs	none	25.4058					1	0.973024						1	HOcs	none	24.9131					1	0.972776
1	HOcs	none	26.6343					2	0.98166						1	HOcs	none	25.3373					2	0.979991						1	HOcs	none	24.8523					2	0.98353
1	ADH1	none	19.8291	19.619	0.184384	0.00939822		4	0.989063						1	ADH1	none	18.5881	18.4715	0.106702	0.00577654		4	0.987469						1	ADH1	none	18.1218	17.9218	0.197071	0.0109962		4	0.990681
1	ADH1	none	19.5438												1	ADH1	none	18.4479												1	ADH1	none	17.9158
1	ADH1	none	19.4841												1	ADH1	none	18.3786												1	ADH1	none	17.7278
1	640bp	none	20.824	20.4992	0.281317	0.0137233		Calculate resected fraction							1	640bp	none	19.7536	19.4548	0.260794	0.0134052		Calculate resected fraction							1	640bp	none	18.8504	18.4801	0.32091	0.0173651		Calculate resected fraction
1	640bp	none	20.3416												1	640bp	none	19.2729												1	640bp	none	18.283
1	640bp	none	20.332					Cut	640bp						1	640bp	none	19.3379					Cut	640bp						1	640bp	none	18.307					Cut	640bp
1	640bp	RsaI	22.138	22.0252	0.139825	0.00634841		Ref	ADH1						1	640bp	RsaI	21.3634	21.3819	0.218161	0.010203		Ref	ADH1						1	640bp	RsaI	20.7124	20.6475	0.196381	0.00951115		Ref	ADH1
1	640bp	RsaI	21.8688												1	640bp	RsaI	21.6087												1	640bp	RsaI	20.4268
1	640bp	RsaI	22.0689					Time	Fraction						1	640bp	RsaI	21.1736					Time	Fraction						1	640bp	RsaI	20.8031					Time	Fraction
2	HOcs	none	27.8533	27.6556	0.259787	0.00939367		0	0.0268618						2	HOcs	none	26.5687	26.3188	0.258804	0.00983345		0	0.0290081						2	HOcs	none	26.2041	25.9752	0.318305	0.0122542		0	0.0581454
2	HOcs	none	27.4578					1	0.540615						2	HOcs	none	26.0688					1	0.441291						2	HOcs	none	25.7464					1	0.387961
2	HOcs	none	27.3637					2	0.911146						2	HOcs	none	26.2024					2	0.806136						2	HOcs	none	25.592					2	0.789756
2	ADH1	none	20.35	20.1759	0.151043	0.00748634		4	0.812126						2	ADH1	none	19.037	18.9035	0.115626	0.00611663		4	0.869191						2	ADH1	none	18.4769	18.1931	0.24599	0.0135211		4	0.947809
2	ADH1	none	20.0812												2	ADH1	none	18.8381												2	ADH1	none	18.0406
2	ADH1	none	20.0963												2	ADH1	none	18.8354												2	ADH1	none	18.0618
2	640bp	none	22.7882	22.7683	0.110339	0.00484617									2	640bp	none	21.3144	21.1342	0.199136	0.00942242									2	640bp	none	20.2444	20.0133	0.200284	0.0100075
2	640bp	none	22.6494												2	640bp	none	20.9204												2	640bp	none	19.8885
2	640bp	none	22.8673												2	640bp	none	21.1679												2	640bp	none	19.9072
2	640bp	RsaI	23.1756	23.0832	0.196659	0.00851959									2	640bp	RsaI	21.8597	21.7678	0.214609	0.00985901									2	640bp	RsaI	20.6352	20.6882	0.19759	0.00955087
2	640bp	RsaI	22.8574												2	640bp	RsaI	21.9211												2	640bp	RsaI	20.5226
2	640bp	RsaI	23.2167												2	640bp	RsaI	21.5225												2	640bp	RsaI	20.9069
4	HOcs	none	26.9368	26.7941	0.136341	0.00508847									4	HOcs	none	26.9013	26.7131	0.178796	0.0066932									4	HOcs	none	26.7422	26.4803	0.227289	0.00858332
4	HOcs	none	26.6651												4	HOcs	none	26.5455												4	HOcs	none	26.3638
4	HOcs	none	26.7803												4	HOcs	none	26.6925												4	HOcs	none	26.3349
4	ADH1	none	18.5672	18.5387	0.0291916	0.00157463									4	ADH1	none	18.5811	18.6215	0.0440509	0.0023656									4	ADH1	none	17.9238	17.8756	0.097218	0.00543859
4	ADH1	none	18.5088												4	ADH1	none	18.6148												4	ADH1	none	17.7637
4	ADH1	none	18.54												4	ADH1	none	18.6685												4	ADH1	none	17.9393
4	640bp	none	21.6751	21.7204	0.0480977	0.0022144									4	640bp	none	21.2003	21.2036	0.00295566	0.000139394									4	640bp	none	20.1428	20.0773	0.101065	0.00503378
4	640bp	none	21.7709												4	640bp	none	21.2059												4	640bp	none	20.1283
4	640bp	none	21.7152												4	640bp	none	21.2046												4	640bp	none	19.9609
4	640bp	RsaI	22.3006	22.3129	0.132175	0.00592372									4	640bp	RsaI	21.7995	21.6276	0.149147	0.00689614									4	640bp	RsaI	20.2017	20.2589	0.162775	0.00803471
4	640bp	RsaI	22.1873												4	640bp	RsaI	21.5507												4	640bp	RsaI	20.1325
4	640bp	RsaI	22.4508												4	640bp	RsaI	21.5326												4	640bp	RsaI	20.4426

[truncated: 1 more sheets: rad9 exo1 sgs1 640 bp]
