# Supplementary material for: Long-range DNA end resection supports homologous recombination by checkpoint activation rather than extensive homology generation
Source: eLife journal article supplement (doi:10.7554/elife.84322), 2023-06-30
Supplement: supp [file Fig4_S1A- source data.xlsx]

## Sheet: Sheet1
Genotype	Culture	Plate	CFU (YPAD)	% white	Average CFU (YPAD)	CFU (YPA + Gal)	% red	Average CFU (YPA + Gal)	Adjusted CFU (YPA + Gal)	Survival frequency	Average survival frequency	ST DEV
Inter WT	1	1	369	1.08401	376	310	5.80645	327.5	327.5	0.871011	0.905719	0.0786746
		2	383	2.87206		345	5.7971
	2	1	138	3.62319	144.5	120	4.16667	131	131	0.906574
		2	151	1.98675		142	3.52113
	3	1	197	1.01523	186	157	1.91083	173.5	173.5	0.932796
		2	175	6.28571		190	4.73684
	4	1	141	4.25532	129.5	97	2.06186	102.5	102.5	0.791506
		2	118	5.08475		108	4.62963
	5	1	322	1.5528	321.5	312	2.5641	289.5	289.5	0.900467
		2	321	1.86916		267	3.37079
	6	1	238	0.840336	219	222	3.6036	226	226	1.03196
		2	200	2.5		230	3.47826
Genotype	Culture	Plate	CFU (YPAD)	% white	Average CFU (YPAD)	CFU (YPA + Gal)	% red	Average CFU (YPA + Gal)	Adjusted CFU (YPA + Gal)	Survival frequency	Average survival frequency	ST DEV
Inter rad24	1	1	153	3.26797	167.5	74	5.40541	66.5	66.5	0.397015	0.399185	0.0721382
		2	182	0.549451		59	0
	2	1	138	2.89855	118	56	1.78571	52.5	52.5	0.444915
		2	98	4.08163		49	8.16327
	3	1	84	2.38095	80.5	28	7.14286	24	24	0.298137
		2	77	5.19481		20	5
	4	1	218	3.21101	213.5	102	3.92157	97.5	97.5	0.456674
		2	209	1.91388		93	6.45161
Genotype	Culture	Plate	CFU (YPAD)	% white	Average CFU (YPAD)	CFU (YPA + Gal)	% red	Average CFU (YPA + Gal)	Adjusted CFU (YPA + Gal)	Survival frequency	Average survival frequency	ST DEV
Inter exo1 sgs1	1	1	137	0	116	107	0	95	9.5	0.0818966	0.0777871	0.025245
		2	95	0		83	0
	2	1	566	0	572.5	304	7.56579	334.5	33.45	0.0584279
		2	579	0		365	4.93151
	3	1	484	0	479.5	369	2.16802	414	41.4	0.0863399
		2	475	0		459	2.83224
	4	1	134	2.23881	131	52	0	65	6.5	0.0496183
		2	128	1.5625		78	3.84615
	5	1	160	2.5	169.5	79	3.79747	91	9.1	0.0536873
		2	179	2.7933		103	7.76699
	6	1	102	0	104.5	82	1.21951	100.5	10.05	0.0961722
		2	107	0		119	0.840336
	7	1	40	17.5	49	61	0	58	5.8	0.118367
		2	58	3.44828		55	1.81818
Genotype	Culture	Plate	CFU (YPAD)	% white	Average CFU (YPAD)	CFU (YPA + Gal)	% red	Average CFU (YPA + Gal)	Adjusted CFU (YPA + Gal)	Survival frequency	Average survival frequency	ST DEV
Inter rad24 exo1 sgs1	1	1	98	2.04082	95.5	29	0	27	27	0.282723	0.299093	0.0303245
		2	93	0		25	0
	2	1	70	4.28571	71.5	27	0	24	24	0.335664
		2	73	0		21	0
	3	1	199	0.502513	199.5	64	4.6875	62	62	0.310777
		2	200	1		60	10
	4	1	133	3.7594	123.5	35	11.4286	33	33	0.267206
		2	114	3.50877		31	3.22581
Genotype	Culture	Plate	CFU (YPAD)	% white	Average CFU (YPAD)	CFU (YPA + Gal)	% red	Average CFU (YPA + Gal)	Adjusted CFU (YPA + Gal)	Survival frequency	Average survival frequency	ST DEV
Inter DDC2-RAD53	1	1	422	0.236967	423	378	3.7037	367	367	0.867612	0.881144	0.174478
		2	424	2.35849		356	5.33708
	2	1	359	1.67131	364	343	2.62391	335.5	335.5	0.921703
		2	369	0.813008		328	4.26829
	3	1	133	0.75188	127	134	2.98507	137	137	1.07874
		2	121	0.826446		140	2.85714
	4	1	114	0	115	67	4.47761	75.5	75.5	0.656522
		2	116	0		84	3.57143
Genotype	Culture	Plate	CFU (YPAD)	% white	Average CFU (YPAD)	CFU (YPA + Gal)	% red	Average CFU (YPA + Gal)	Adjusted CFU (YPA + Gal)	Survival frequency	Average survival frequency	ST DEV
Inter rad24 DDC2-RAD53	1	1	217	1.38249	217	108	8.33333	108	108	0.497696	0.545528	0.0676455
		2
	2	1	241	0.829876	241	143	11.1888	143	143	0.593361
		2
Genotype	Culture	Plate	CFU (YPAD)	% white	Average CFU (YPAD)	CFU (YPA + Gal)	% red	Average CFU (YPA + Gal)	Adjusted CFU (YPA + Gal)	Survival frequency	Average survival frequency	ST DEV
Inter exo1 sgs1 DDC2-RAD53	1	1	15	13.3333	14.5	1	0	1	0.1	0.00689655	0.00846467	0.00221765
		2	14	14.2857		1	0
	2	1	30	0	30.5	177	1.12994	153	0.306	0.0100328
		2	31	0		129	2.32558
Genotype	Culture	Plate	CFU (YPAD)	% white	Average CFU (YPAD)	CFU (YPA + Gal)	% red	Average CFU (YPA + Gal)	Adjusted CFU (YPA + Gal)	Survival frequency	Average survival frequency	ST DEV
Inter exo1 sgs1 rad24 DDC2-RAD53	1	1	20	0	20	38	7.89474	38	3.8	0.19	0.157733	0.025481
		2					#DIV/0!
	2	1	33	0	33	46	8.69565	46	4.6	0.139394
		2					#DIV/0!
	3	1	65	0	65	88	14.7727	88	8.8	0.135385
		2					#DIV/0!
	4	1	65	1.53846	65	108	19.4444	108	10.8	0.166154
		2					#DIV/0!
Genotypes compared	p-value	Indicator
WT-rad24	1.55789e-05	****
WT-exo1 sgs1	1.13741e-05	****
WT-rad24 exo1 sgs1	6.64273e-07	****
WT - DDC2-RAD53	0.805134	ns
rad24 - rad24 DDC2-RAD53	0.122072	ns
exo1 sgs1 - exo1 sgs1 DDC2-RAD53	0.000297872	***
exo1 sgs1 rad24 - exo1 sgs1 rad24 DDC2-RAD53	0.000433895	***
exo1 sgs1 - exo1 sgs1 rad24	3.55045e-05	****
DDC2-RAD53 - rad24 DDC2-RAD53	0.0280396	*
DDC2-RAD53 - exo1 sgs1 DDC2-RAD53	0.00212149	**
DDC2-RAD53 - exo1 sgs1 rad24 DDC2-RAD53	0.00324065	**
exo1 sgs1 DDC2-RAD53 - exo1 sgs1 rad24 DDC2-RAD53	0.00118875	**
