# Supplementary material for: Long-range DNA end resection supports homologous recombination by checkpoint activation rather than extensive homology generation
Source: eLife journal article supplement (doi:10.7554/elife.84322), 2023-06-30
Supplement: supp [file Fig4_S1B-source data.xlsx]

## Sheet: Summary
Biological replicate #1	WT	WT (Technical replicate)	exo1 sgs1	exo1 sgs1 (Technical replicate)	Ddc2-Rad53	exo1 sgs1 Ddc2-Rad53								640bp	Average
Time (h)	640 bp	640 bp	640 bp	640 bp	640 bp	640 bp								Time	WT	exo1 sgs1	Ddc2-Rad53	exo1 sgs1 Ddc2-Rad53
0	0	0	0	0	0	0								0	0	0	0	0
1	0.317111	0.367937	0.011921	0.0173022	0.398352	0.0401438								1	0.329741	0.0219747	0.347802	0.0482877
2	0.468089	0.836856	0.044153	0.0519807	0.677325	0.0468374								2	0.702626	0.0509051	0.719817	0.0577253
4	0.865415	0.780962	0.115395	0.146125	0.783285	0.0769394								4	0.805207	0.147362	0.824823	0.102572
6	0.642967	0.677066	0.242723	0.288457	0.833597	0.199384								6	0.695445	0.249002	0.866097	0.216522
Biological replicate #2	WT	exo1 sgs1	Ddc2-Rad53	exo1 sgs1 Ddc2-Rad53
Time (h)	640 bp	640 bp	640 bp	640 bp
0	0	0	0	0
1	0.323249	0.0378377	0.389699	0.0484063
2	0.866432	0.0628749	0.846347	0.0634763
4	0.854201	0.204159	0.84985	0.0857934
6	0.81161	0.263685	0.958787	0.20127
Biological replicate #3	WT	exo1 sgs1	Ddc2-Rad53	exo1 sgs1 Ddc2-Rad53
Time (h)	640 bp	640 bp	640 bp	640 bp
0	0	0	0	0
1	0.310665	0.0208377	0.384909	0.0414748
2	0.639128	0.0446117	0.707059	0.0433829
4	0.720249	0.123769	0.769343	0.0728881
6	0.650135	0.201142	0.808002	0.187871
Biological replicate #4	WT	exo1 sgs1	Ddc2-Rad53	exo1 sgs1 Ddc2-Rad53
Time (h)	640 bp	640 bp	640 bp	640 bp
0	N/A	N/A	0	0
1	N/A	N/A	0.218248	0.0631258
2	N/A	N/A	0.648538	0.0772047
4	N/A	N/A	0.896813	0.174669
6	N/A	N/A	0.864001	0.277563

## Sheet: WT 640bp
Biological Replicate 1												Biological Replicate 1, Technical Replicate 2												Biological Replicate 2												Biological Replicate 3
Time	Amplicon	Digest	Cq	Mean	SD	COV		Primer Efficiencies				Time	Amplicon	Digest	Cq	Mean	SD	COV		Primer Efficiencies				Time	Amplicon	Digest	Cq	Mean	SD	COV		Primer Efficiencies				Time	Amplicon	Digest	Cq	Mean	SD	COV		Primer Efficiencies
0	HOcs	none		23.1563	3.90825	0.168777		HOcs	2.01			0	HOcs	none	20.1686	20.1729	0.0110947	0.000549981		HOcs	2.01			0	HOcs	none	21.9139	21.7924	0.013396	0.000614708		HOcs	2.01			0	HOcs	none	21.4486	21.5161	0.00476941	0.000221667		HOcs	2.01
0	HOcs	none	20.3927					ADH1	1.98			0	HOcs	none	20.1807					ADH1	1.98			0	HOcs	none	21.7829					ADH1	1.98			0	HOcs	none	21.5127					ADH1	1.98
0	HOcs	none	25.9198					640bp	1.96			0	HOcs	none	20.1651					640bp	1.96			0	HOcs	none	21.8019					640bp	1.96			0	HOcs	none	21.5195					640bp	1.96
0	ADH1	none		20.7593	0.840186	0.0404727						0	ADH1	none	18.532	18.6142	0.0333712	0.00179278						0	ADH1	none	19.8078	19.9089	0.0850888	0.0042739						0	ADH1	none	19.7542	19.869	7.83794e-05	3.94482e-06
0	ADH1	none	20.1652					Calculate HOcs Cut Fraction				0	ADH1	none	18.6789					Calculate HOcs Cut Fraction				0	ADH1	none	20.0197					Calculate HOcs Cut Fraction				0	ADH1	none	19.9263					Calculate HOcs Cut Fraction
0	ADH1	none	21.3534									0	ADH1	none	18.6317									0	ADH1	none	19.8993									0	ADH1	none	19.9264
0	640bp	none	19.6347	19.7784	0.121048	0.00612024		Cut	HOcs			0	640bp	none	19.578	19.5517	0.113714	0.00581608		Cut	HOcs			0	640bp	none	20.8273	20.9457	0.107418	0.00512838		Cut	HOcs			0	640bp	none	20.8681	20.802	0.0894024	0.00429777		Cut	HOcs
0	640bp	none	19.9358					Ref	ADH1			0	640bp	none	19.4582					Ref	ADH1			0	640bp	none	20.929					Ref	ADH1			0	640bp	none	20.7058					Ref	ADH1
0	640bp	none	19.7646									0	640bp	none	19.619									0	640bp	none	21.0809									0	640bp	none	20.8322
0	ADH1	RsaI	19.4999	19.2723	0.321903	0.0167029		Time	Fraction			0	ADH1	RsaI	18.5092	18.5207	0.0353129	0.00190667		Time	Fraction			0	ADH1	RsaI	19.747	19.7525	0.0202435	0.00102486		Time	Fraction			0	ADH1	RsaI	19.6906	19.7691	0.0738688	0.00373657		Time	Fraction
0	ADH1	RsaI	19.0447					0	0			0	ADH1	RsaI	18.5591					0	0			0	ADH1	RsaI	19.7756					0	0			0	ADH1	RsaI	19.795					0	0
0	ADH1	RsaI						1	0.961168			0	ADH1	RsaI	18.4939					1	0.977827			0	ADH1	RsaI	19.7348					1	0.967889			0	ADH1	RsaI	19.8218					1	0.97035
0	640bp	RsaI	27.7602	27.9477	0.183939	0.00658155		2	0.983271			0	640bp	RsaI	27.4399	27.2509	0.032757	0.00120205		2	0.986752			0	640bp	RsaI	27.0816	27.1756	0.0555855	0.00204542		2	0.969714			0	640bp	RsaI	26.8283	26.9983	0.025788	0.00095517		2	0.973875
0	640bp	RsaI	28.1715					4	0.996633			0	640bp	RsaI	27.1332					4	0.989706			0	640bp	RsaI	27.1833					4	0.970336			0	640bp	RsaI	27.1015					4	0.975596
0	640bp	RsaI	27.9113					6	0.99041			0	640bp	RsaI	27.1795					6	0.991452			0	640bp	RsaI	27.262					6	0.979326			0	640bp	RsaI	27.0651					6	0.980276
1	HOcs	none		25.8545	0.00920554	0.000356052						1	HOcs	none	25.6425	25.4139	0.133424	0.00525006						1	HOcs	none	27.1965	27.0451	0.0805555	0.00297857						1	HOcs	none	26.7308	26.6598	0.0681931	0.0025579
1	HOcs	none	25.848									1	HOcs	none	25.5082									1	HOcs	none	26.9881									1	HOcs	none	26.576
1	HOcs	none	25.861									1	HOcs	none	25.3196									1	HOcs	none	27.102									1	HOcs	none	26.6725
1	ADH1	none	18.9279	18.7614	0.235534	0.0125542						1	ADH1	none	18.4559	18.3947	0.0476552	0.0025907						1	ADH1	none	20.4161	20.2435	0.159044	0.00785654						1	ADH1	none	20.0313	19.9753	0.0472059	0.00236321
1	ADH1	none	18.5948					Calculate Resected Fraction				1	ADH1	none	18.3885					Calculate Resected Fraction				1	ADH1	none	20.1911					Calculate Resected Fraction				1	ADH1	none	19.9645					Calculate Resected Fraction
1	ADH1	none										1	ADH1	none	18.3396									1	ADH1	none	20.1232									1	ADH1	none	19.9302
1	640bp	none	19.7756	19.7351	0.0485776	0.00246148		Cut	640bp			1	640bp	none	19.4699	19.6193	0.00647338	0.000329949		Cut	640bp			1	640bp	none		20.8367	0.541035	0.0259655		Cut	640bp			1	640bp	none	20.8365	20.7675	0.11405	0.00549176		Cut	640bp
1	640bp	none	19.7492					Ref	ADH1			1	640bp	none	19.6895					Ref	ADH1			1	640bp	none	20.4541					Ref	ADH1			1	640bp	none	20.6524					Ref	ADH1
1	640bp	none	19.6805									1	640bp	none	19.6986									1	640bp	none	21.2192									1	640bp	none	20.8137
1	ADH1	RsaI	18.7732	18.7265	0.111943	0.00597777		Time	Fraction			1	ADH1	RsaI	18.3821	18.4028	0.0102795	0.000558581		Time	Fraction			1	ADH1	RsaI	20.0149	20.1918	0.104703	0.00518542		Time	Fraction			1	ADH1	RsaI	19.7374	19.9479	0.0257861	0.00129267		Time	Fraction
1	ADH1	RsaI	18.7822					0	0			1	ADH1	RsaI	18.4059					0	0			1	ADH1	RsaI	20.3542					0	0			1	ADH1	RsaI	20.0349					0	0
1	ADH1	RsaI	18.6239					1	0.317111			1	ADH1	RsaI	18.4204					1	0.367937			1	ADH1	RsaI	20.2062					1	0.323249			1	ADH1	RsaI	20.0714					1	0.310665
1	640bp	RsaI	22.2424	22.2495	0.255345	0.0114764		2	0.468089			1	640bp	RsaI	21.6719	21.882	0.030279	0.00138374		2	0.836856			1	640bp	RsaI	23.46	23.2881	0.101695	0.00436684		2	0.866432			1	640bp	RsaI	23.2249	23.3089	0.114491	0.00491192		2	0.639128
1	640bp	RsaI	22.4336					4	0.865415			1	640bp	RsaI	21.9657					4	0.780962			1	640bp	RsaI	23.1302					4	0.854201			1	640bp	RsaI	23.4318					4	0.720249
1	640bp	RsaI	22.0725					6	0.642967			1	640bp	RsaI	22.0085					6	0.677066			1	640bp	RsaI	23.2741					6	0.81161			1	640bp	RsaI	23.2699					6	0.650135
2	HOcs	none	30.4338	27.6659	0.0696035	0.00251585						2	HOcs	none	26.1737	26.1378	0.0293373	0.00112241						2	HOcs	none	27.1065	27.1325	0.0886762	0.00326827						2	HOcs	none	27.3206	27.2337	0.0681881	0.00250381
2	HOcs	none	26.2328									2	HOcs	none	26.1406									2	HOcs	none	27.0828									2	HOcs	none	27.1421
2	HOcs	none	26.3312									2	HOcs	none	26.0991									2	HOcs	none	27.2082									2	HOcs	none	27.2385
2	ADH1	none	18.9454	19.3799	0.429413	0.0221576						2	ADH1	none	18.3636	18.3806	0.13716	0.00746223						2	ADH1	none	20.2762	20.2472	0.0626824	0.00309586						2	ADH1	none	20.4201	20.3766	0.0661354	0.00324565
2	ADH1	none	19.2935									2	ADH1	none	18.486									2	ADH1	none	20.277									2	ADH1	none	20.4017
2	ADH1	none	19.9008									2	ADH1	none	18.2921									2	ADH1	none	20.1883									2	ADH1	none	20.3081
2	640bp	none	20.5592	20.6642	0.0837501	0.0040529						2	640bp	none	20.5035	20.4999	0.0201366	0.000982281						2	640bp	none	21.86	21.8156	0.0198545	0.000910105						2	640bp	none	22.096	22.0285	0.0847988	0.00384951
2	640bp	none	20.6575									2	640bp	none	20.4838									2	640bp	none	21.8075									2	640bp	none	21.9347
2	640bp	none	20.776									2	640bp	none	20.5123									2	640bp	none	21.7794									2	640bp	none	22.0546
2	ADH1	RsaI	18.7528	18.8563	0.0865659	0.00459082						2	ADH1	RsaI	18.5027	18.5127	0.0222817	0.00120359						2	ADH1	RsaI	20.16	20.2422	0.0725854	0.00358585						2	ADH1	RsaI	20.2757	20.3854	0.013542	0.000664297
2	ADH1	RsaI	18.8468									2	ADH1	RsaI	18.5019									2	ADH1	RsaI	20.3346									2	ADH1	RsaI	20.4307
2	ADH1	RsaI	18.9693									2	ADH1	RsaI	18.5334									2	ADH1	RsaI	20.232									2	ADH1	RsaI	20.4498
2	640bp	RsaI	21.6784	21.9272	0.125941	0.00574358						2	640bp	RsaI	21.0487	21.1571	0.125908	0.00595106						2	640bp	RsaI	22.1797	22.2896	0.085361	0.00382963						2	640bp	RsaI	23.1721	23.2179	0.00836406	0.000360242
2	640bp	RsaI	21.9626									2	640bp	RsaI	21.1223									2	640bp	RsaI	22.405									2	640bp	RsaI	23.2349
2	640bp	RsaI	22.1407									2	640bp	RsaI	21.3004									2	640bp	RsaI	22.2842									2	640bp	RsaI	23.2467
4	HOcs	none	29.5814	29.0286	0.781743	0.0269301						4	HOcs	none	26.3105	26.3156	0.0123577	0.000469596						4	HOcs	none	27.0118	27.0142	0.0254838	0.00094335						4	HOcs	none	27.3233	27.3069	0.112893	0.00413425
4	HOcs	none	28.4758									4	HOcs	none	26.3279									4	HOcs	none	26.9757									4	HOcs	none	27.1636
4	HOcs	none										4	HOcs	none	26.3085									4	HOcs	none	27.0551									4	HOcs	none	27.4338
4	ADH1	none	18.4386	18.4256	0.151847	0.00824105						4	ADH1	none	18.1305	18.1929	0.102011	0.00560718						4	ADH1	none	20.0511	20.0959	0.0315163	0.0015683						4	ADH1	none	20.2756	20.3517	0.118989	0.00584663
4	ADH1	none	18.3118									4	ADH1	none	18.2963									4	ADH1	none	20.1405									4	ADH1	none	20.4738
4	ADH1	none	18.5266									4	ADH1	none	18.152									4	ADH1	none	20.096									4	ADH1	none	20.3055
4	640bp	none	20.7996	20.6929	0.0646408	0.00312382						4	640bp	none	20.6335	20.5895	0.0596476	0.00289699						4	640bp	none	21.7582	21.7227	0.0556694	0.00256273						4	640bp	none	22.1111	22.0605	0.0627983	0.00284664
4	640bp	none	20.6852									4	640bp	none	20.5254									4	640bp	none	21.6656									4	640bp	none	21.9908
4	640bp	none	20.5938									4	640bp	none	20.6097									4	640bp	none	21.7443									4	640bp	none	22.0796
4	ADH1	RsaI	19.3074	18.6492	0.0698571	0.00374586						4	ADH1	RsaI	18.4296	18.3224	0.00491839	0.000268436						4	ADH1	RsaI	20.0376	20.026	0.0193867	0.000968079						4	ADH1	RsaI	20.4716	20.5479	0.0408339	0.00198725
4	ADH1	RsaI	18.2706									4	ADH1	RsaI	18.2723									4	ADH1	RsaI	20.0065									4	ADH1	RsaI	20.5572
4	ADH1	RsaI	18.3694									4	ADH1	RsaI	18.2654									4	ADH1	RsaI	20.0339									4	ADH1	RsaI	20.6149
4	640bp	RsaI	21.3431	21.331	0.0698992	0.00327688						4	640bp	RsaI	21.4459	21.4078	0.231951	0.0108349						4	640bp	RsaI	22.1758	22.1654	0.0694678	0.00313406						4	640bp	RsaI	23.1285	23.1709	0.0780454	0.00336826
4	640bp	RsaI	21.2755									4	640bp	RsaI	21.2248									4	640bp	RsaI	22.2094									4	640bp	RsaI	23.2472
4	640bp	RsaI	21.3744									4	640bp	RsaI	21.5528									4	640bp	RsaI	22.1111									4	640bp	RsaI	23.1369
6	HOcs	none	28.8291	27.4158	0.24855	0.00906594						6	HOcs	none	26.3402	26.3684	0.131682	0.00499395						6	HOcs	none	27.3471	27.3096	0.218551	0.00800274						6	HOcs	none	27.3949	27.5186	0.0764779	0.00277913
6	HOcs	none	26.885									6	HOcs	none	26.4756									6	HOcs	none	27.4454									6	HOcs	none	27.5264
6	HOcs	none	26.5335									6	HOcs	none	26.2894									6	HOcs	none	27.1363									6	HOcs	none	27.6346
6	ADH1	none	18.5078	18.3098	0.28007	0.0152962						6	ADH1	none	17.932	17.9748	0.0533242	0.00296661						6	ADH1	none	19.9168	19.8692	0.0485241	0.00244218						6	ADH1	none	20.3311	20.2564	0.0668348	0.00329945
6	ADH1	none										6	ADH1	none	18.0345									6	ADH1	none	19.871									6	ADH1	none	20.2358
6	ADH1	none	18.1117									6	ADH1	none	17.958									6	ADH1	none	19.8198									6	ADH1	none	20.2022
6	640bp	none	20.438	20.5329	0.116107	0.00565469						6	640bp	none	20.3808	20.3656	0.144795	0.00710979						6	640bp	none	21.6154	21.5627	0.177382	0.00822636						6	640bp	none	21.7143	21.6916	0.145436	0.00670469
6	640bp	none	20.6624									6	640bp	none	20.2556									6	640bp	none	21.4109									6	640bp	none	21.5775
6	640bp	none	20.4982									6	640bp	none	20.4604									6	640bp	none	21.6617									6	640bp	none	21.7831
6	ADH1	RsaI	18.2036	18.2567	0.125907	0.00689651						6	ADH1	RsaI	17.74	17.8871	0.0162364	0.000907713						6	ADH1	RsaI	19.6704	19.771	0.0554214	0.00280317						6	ADH1	RsaI	20.0843	20.2075	0.0775568	0.00383802
6	ADH1	RsaI	18.1942									6	ADH1	RsaI	17.9722									6	ADH1	RsaI	19.8605									6	ADH1	RsaI	20.324
6	ADH1	RsaI	18.3722									6	ADH1	RsaI	17.9492									6	ADH1	RsaI	19.7821									6	ADH1	RsaI	20.2143
6	640bp	RsaI		21.61	0.838888	0.0388194						6	640bp	RsaI	21.3108	21.2912	0.0371647	0.00174555						6	640bp	RsaI	22.0564	22.0815	0.0662329	0.00299947						6	640bp	RsaI	22.8028	22.7714	0.0601061	0.00263955
6	640bp	RsaI	22.2032									6	640bp	RsaI	21.2551									6	640bp	RsaI	22.1409									6	640bp	RsaI	22.7981
6	640bp	RsaI	21.0168									6	640bp	RsaI	21.3076									6	640bp	RsaI	22.0473									6	640bp	RsaI	22.7131

## Sheet: exo1 sgs1 640bp
Biological replicate 1												Biological Replicate 1, Technical Replicate 2												Biological Replicate 2												Biological Replicate 3
Time	Amplicon	Digest	Cq	Mean	SD	COV		Primer Efficiencies				Time	Amplicon	Digest	Cq	Mean	SD	COV		Primer Efficiencies				Time	Amplicon	Digest	Cq	Mean	SD	COV		Primer Efficiencies				Time	Amplicon	Digest	Cq	Mean	SD	COV		Primer Efficiencies
0	HOcs	none	21.4227	21.4761	0.0377795	0.00175914		HOcs	2.01			0	HOcs	none	21.5581	21.4197	0.117402	0.00548104		HOcs	2.01			0	HOcs	none	22.5096	22.2783	0.0682848	0.00306509		HOcs	2.01			0	HOcs	none	23.0814	22.9439	0.111388	0.00485479		HOcs	2.01
0	HOcs	none	21.4761					ADH1	1.98			0	HOcs	none	21.5027					ADH1	1.98			0	HOcs	none	22.3266					ADH1	1.98			0	HOcs	none	23.0227					ADH1	1.98
0	HOcs	none						640bp	1.96			0	HOcs	none	21.3366					640bp	1.96			0	HOcs	none	22.23					640bp	1.96			0	HOcs	none	22.8651					640bp	1.96
0	ADH1	none	19.3339	19.6245	0.381224	0.0194259						0	ADH1	none	19.6968	19.5932	0.0868431	0.00443231						0	ADH1	none	20.3313	20.2234	0.0724073	0.00358038						0	ADH1	none	21.1279	21.0449	0.0501446	0.00238274
0	ADH1	none	20.0394					Calculate HOcs Cut Fraction				0	ADH1	none	19.6028					Calculate HOcs Cut Fraction				0	ADH1	none	20.2206					Calculate HOcs Cut Fraction				0	ADH1	none	21.0389					Calculate HOcs Cut Fraction
0	ADH1	none	19.5002									0	ADH1	none	19.48									0	ADH1	none	20.1182									0	ADH1	none	20.968
0	640bp	none	20.4681	20.4632	0.139799	0.00683172		Cut	HOcs			0	640bp	none	20.7738	20.7055	0.0014391	6.95033e-05		Cut	HOcs			0	640bp	none	21.4174	21.3842	0.0180226	0.000842801		Cut	HOcs			0	640bp	none	22.1476	22.1131	0.0602224	0.00272338		Cut	HOcs
0	640bp	none	20.5597					Ref	ADH1			0	640bp	none	20.6724					Ref	ADH1			0	640bp	none	21.3548					Ref	ADH1			0	640bp	none	22.0532					Ref	ADH1
0	640bp	none	20.362									0	640bp	none	20.6704									0	640bp	none	21.3803									0	640bp	none	22.1384
0	ADH1	RsaI	19.6306	19.5965	0.203042	0.0103611		Time	Fraction			0	ADH1	RsaI	19.7936	19.7783	0.130228	0.00658439		Time	Fraction			0	ADH1	RsaI	20.2243	20.2116	0.013134	0.000649826		Time	Fraction			0	ADH1	RsaI	21.0213	21.0431	0.0605727	0.0028785		Time	Fraction
0	ADH1	RsaI	19.3434					0	0			0	ADH1	RsaI	19.9778					0	0			0	ADH1	RsaI	20.2057					0	0			0	ADH1	RsaI	21.1069					0	0
0	ADH1	RsaI	19.8156					1	0.843491			0	ADH1	RsaI	19.5635					1	0.785856			0	ADH1	RsaI	20.2046					1	0.803084			0	ADH1	RsaI	21.0011					1	0.815169
0	640bp	RsaI	27.5813	27.6375	0.0901467	0.00326175		2	0.910888			0	640bp	RsaI	27.5738	27.5648	0.117401	0.00425908		2	0.859517			0	640bp	RsaI	26.1952	26.3778	0.0934032	0.00354097		2	0.85357			0	640bp	RsaI	28.0162	28.1566	0.0786801	0.00279438		2	0.869569
0	640bp	RsaI	27.7294					4	0.896114			0	640bp	RsaI	27.4773					4	0.910542			0	640bp	RsaI	26.4031					4	0.898492			0	640bp	RsaI	28.1711					4	0.908741
0	640bp	RsaI	27.6019					6	0.913504			0	640bp	RsaI	27.6434					6	0.916039			0	640bp	RsaI	26.5352					6	0.894077			0	640bp	RsaI	28.2824					6	0.909541
1	HOcs	none	23.8212	23.8608	0.317792	0.0133186						1	HOcs	none	23.082	23.1607	0.063642	0.00274785						1	HOcs	none	24.6222	24.696	0.0537999	0.00217849						1	HOcs	none	25.3662	25.2523	0.144387	0.00571779
1	HOcs	none	23.6559									1	HOcs	none	23.1157									1	HOcs	none	24.734									1	HOcs	none	25.2974
1	HOcs	none	24.1053									1	HOcs	none	23.2057									1	HOcs	none	24.6579									1	HOcs	none	25.0932
1	ADH1	none	19.2919	19.3466	0.0273034	0.00141127						1	ADH1	none	19.7179	19.1165	0.633521	0.0331401						1	ADH1	none	20.3474	20.3154	0.0978361	0.00481585						1	ADH1	none	20.9296	20.9325	0.146738	0.00701006
1	ADH1	none	19.2533					Calculate Resected Fraction				1	ADH1	none	18.822					Calculate Resected Fraction				1	ADH1	none	20.4858					Calculate Resected Fraction				1	ADH1	none	21.1371					Calculate Resected Fraction
1	ADH1	none	19.4945									1	ADH1	none	18.8095									1	ADH1	none	20.1131									1	ADH1	none	20.731
1	640bp	none	19.8634	19.7996	0.120257	0.00607371		Cut	640bp			1	640bp	none	19.9887	19.955	0.329012	0.0164877		Cut	640bp			1	640bp	none	21.1967	21.1777	0.202617	0.00956747		Cut	640bp			1	640bp	none	21.4129	21.4776	0.176264	0.00820686		Cut	640bp
1	640bp	none	19.8527					Ref	ADH1			1	640bp	none	19.7055					Ref	ADH1			1	640bp	none	21.025					Ref	ADH1			1	640bp	none	21.3853					Ref	ADH1
1	640bp	none	19.6827									1	640bp	none	20.1708									1	640bp	none	21.3115									1	640bp	none	21.6346
1	ADH1	RsaI	20.0944	19.6521	0.351851	0.017904		Time	Fraction			1	ADH1	RsaI	19.2651	19.1233	0.143414	0.00749945		Time	Fraction			1	ADH1	RsaI	20.2297	20.1662	0.146763	0.00727768		Time	Fraction			1	ADH1	RsaI	20.8608	20.7632	0.180299	0.00868358		Time	Fraction
1	ADH1	RsaI	19.1821					0	0			1	ADH1	RsaI	19.1538					0	0			1	ADH1	RsaI	20.2382					0	0			1	ADH1	RsaI	20.8418					0	0
1	ADH1	RsaI	19.6797					1	0.011921			1	ADH1	RsaI	18.951					1	0.0173022			1	ADH1	RsaI	20.0306					1	0.0378377			1	ADH1	RsaI	20.5869					1	0.0208377
1	640bp	RsaI	27.9331	27.9673	0.0520747	0.00186198		2	0.044153			1	640bp	RsaI	27.3733	27.3685	0.0747416	0.00273094		2	0.0519807			1	640bp	RsaI	27.0684	27.2252	0.05898	0.00216637		2	0.0628749			1	640bp	RsaI	28.3492	28.379	0.00591899	0.000208569		2	0.0446117
1	640bp	RsaI	27.9476					4	0.115395			1	640bp	RsaI	27.4189					4	0.146125			1	640bp	RsaI	27.3453					4	0.204159			1	640bp	RsaI	28.3982					4	0.123769
1	640bp	RsaI	28.0213					6	0.242723			1	640bp	RsaI	27.3132					6	0.288457			1	640bp	RsaI	27.2619					6	0.263685			1	640bp	RsaI	28.3898					6	0.201142
2	HOcs	none	25.614	24.5017	0.152403	0.00622009						2	HOcs	none	23.7871	23.6508	0.016537	0.000699212						2	HOcs	none	25.2605	25.2389	0.0207955	0.000823946						2	HOcs	none	25.8736	25.7652	0.0406085	0.0015761
2	HOcs	none	24.0532									2	HOcs	none	23.5944									2	HOcs	none	25.2133									2	HOcs	none	25.6823
2	HOcs	none	23.8377									2	HOcs	none	23.571									2	HOcs	none	25.2427									2	HOcs	none	25.7397
2	ADH1	none	19.1536	19.1771	0.00323736	0.000168814						2	ADH1	none	18.9234	19.0003	0.0355736	0.00187227						2	ADH1	none	20.3024	20.4366	0.204631	0.0100129						2	ADH1	none	20.9286	20.9464	0.019432	0.000927698
2	ADH1	none	19.1865									2	ADH1	none	19.0136									2	ADH1	none	20.6484									2	ADH1	none	20.9416
2	ADH1	none	19.191									2	ADH1	none	19.0639									2	ADH1	none	20.359									2	ADH1	none	20.9691
2	640bp	none	19.601	19.8236	0.175326	0.00884428						2	640bp	none	20.0541	20.0469	0.0694445	0.00346411						2	640bp	none	21.4987	21.3575	0.0840753	0.00393657						2	640bp	none	21.7788	21.6658	0.152207	0.00702521
2	640bp	none	19.8109									2	640bp	none	19.9941									2	640bp	none	21.2275									2	640bp	none	21.5016
2	640bp	none	20.0589									2	640bp	none	20.0924									2	640bp	none	21.3464									2	640bp	none	21.7169
2	ADH1	RsaI	19.398	19.3608	0.0853406	0.00440792						2	ADH1	RsaI	19.1387	19.0865	0.1217	0.00637622						2	ADH1	RsaI	20.2786	20.2755	0.056242	0.00277389						2	ADH1	RsaI	20.8785	20.875	0.00463292	0.000221936
2	ADH1	RsaI	19.4025									2	ADH1	RsaI	19.1465									2	ADH1	RsaI	20.3138									2	ADH1	RsaI	20.8765
2	ADH1	RsaI	19.2818									2	ADH1	RsaI	18.9744									2	ADH1	RsaI	20.2342									2	ADH1	RsaI	20.87
2	640bp	RsaI	25.4732	25.7851	0.379032	0.0146996						2	640bp	RsaI	25.8195	25.7497	0.172791	0.00671041						2	640bp	RsaI	26.4801	26.5301	0.0431727	0.00162731						2	640bp	RsaI	27.3176	27.423	0.0426743	0.00155615
2	640bp	RsaI	26.2091									2	640bp	RsaI	25.837									2	640bp	RsaI	26.5856									2	640bp	RsaI	27.4455
2	640bp	RsaI	25.6731									2	640bp	RsaI	25.5927									2	640bp	RsaI	26.5245									2	640bp	RsaI	27.5058
4	HOcs	none	24.4672	24.397	0.128902	0.00528351						4	HOcs	none	23.8342	23.8659	0.057946	0.00242799						4	HOcs	none	25.8228	25.8171	0.0486654	0.00188501						4	HOcs	none	26.2257	26.0069	0.196373	0.00755082
4	HOcs	none	24.2849									4	HOcs	none	23.9161									4	HOcs	none	25.8916									4	HOcs	none	25.948
4	HOcs	none	24.4388									4	HOcs	none	23.8473									4	HOcs	none	25.7368									4	HOcs	none	25.8471
4	ADH1	none	19.4922	19.2946	0.0118235	0.000612784						4	ADH1	none	18.7966	18.5594	0.0833551	0.00449127						4	ADH1	none	20.5777	20.4912	0.00734007	0.000358207						4	ADH1	none	20.7044	20.6706	0.0221136	0.0010698
4	ADH1	none	19.1875									4	ADH1	none	18.3818									4	ADH1	none	20.4531									4	ADH1	none	20.6694
4	ADH1	none	19.2042									4	ADH1	none	18.4997									4	ADH1	none	20.4427									4	ADH1	none	20.6381
4	640bp	none	20.2033	20.1504	0.0912476	0.00452832						4	640bp	none	19.6828	19.8209	0.263242	0.013281						4	640bp	none	21.8741	21.7789	0.17702	0.00812808						4	640bp	none	21.8168	21.7705	0.224731	0.0103227
4	640bp	none	20.0595									4	640bp	none	19.7038									4	640bp	none	21.8564									4	640bp	none	21.5884
4	640bp	none	20.1885									4	640bp	none	20.0761									4	640bp	none	21.6061									4	640bp	none	21.9063
4	ADH1	RsaI	19.2533	19.1698	0.102103	0.00532623						4	ADH1	RsaI	18.6163	18.6607	0.136918	0.00733725						4	ADH1	RsaI	20.2441	20.4626	0.326542	0.015958						4	ADH1	RsaI	20.5821	20.7251	0.0170449	0.000822429
4	ADH1	RsaI	19.0559									4	ADH1	RsaI	18.7797									4	ADH1	RsaI	20.8028									4	ADH1	RsaI	20.7845
4	ADH1	RsaI	19.2003									4	ADH1	RsaI	18.586									4	ADH1	RsaI	20.341									4	ADH1	RsaI	20.8086
4	640bp	RsaI	24.3308	24.3467	0.0103573	0.000425408						4	640bp	RsaI	23.977	23.8487	0.111178	0.00466179						4	640bp	RsaI	24.961	25.1571	0.0681112	0.00270744						4	640bp	RsaI	25.8319	26.0167	0.0708388	0.00272282
4	640bp	RsaI	24.3473									4	640bp	RsaI	23.8632									4	640bp	RsaI	25.2069									4	640bp	RsaI	26.0591
4	640bp	RsaI	24.362									4	640bp	RsaI	23.706									4	640bp	RsaI	25.3032									4	640bp	RsaI	26.1592
6	HOcs	none	24.7026	24.2451	0.647128	0.0266911						6	HOcs	none	24.0625	24.0143	0.0536107	0.00223245						6	HOcs	none	25.7111	25.6789	0.136729	0.00532457						6	HOcs	none	26.3042	26.1148	0.0680062	0.00260412
6	HOcs	none										6	HOcs	none	24.0282									6	HOcs	none	25.5661									6	HOcs	none	25.9721
6	HOcs	none	23.7875									6	HOcs	none	23.9523									6	HOcs	none	25.7595									6	HOcs	none	26.0682
6	ADH1	none	18.8761	18.8712	0.0764813	0.00405281						6	ADH1	none	18.6031	18.6183	0.043367	0.00232927						6	ADH1	none	20.3987	20.4123	0.106993	0.00524162						6	ADH1	none	20.6753	20.768	0.112916	0.00543702
6	ADH1	none	18.7923									6	ADH1	none	18.6672									6	ADH1	none	20.5254									6	ADH1	none	20.8938
6	ADH1	none	18.9451									6	ADH1	none	18.5845									6	ADH1	none	20.3127									6	ADH1	none	20.7351
6	640bp	none	20.1869	20.3468	0.269831	0.0132616						6	640bp	none	20.0948	20.1532	0.0885848	0.00439557						6	640bp	none	21.8666	21.8392	0.259065	0.0118624						6	640bp	none	22.1456	22.1041	0.256607	0.011609
6	640bp	none	20.6175									6	640bp	none	20.1198									6	640bp	none	21.6422									6	640bp	none	21.9019
6	640bp	none	20.2359									6	640bp	none	20.2451									6	640bp	none	22.0086									6	640bp	none	22.2648
6	ADH1	RsaI	19.0082	18.7973	0.044161	0.00234932						6	ADH1	RsaI	18.762	18.6071	0.0527601	0.00283548						6	ADH1	RsaI	20.2353	20.2244	0.228284	0.0112876						6	ADH1	RsaI	20.7239	20.7608	0.0369098	0.00177786
6	ADH1	RsaI	18.7231									6	ADH1	RsaI	18.567									6	ADH1	RsaI	20.3803									6	ADH1	RsaI	20.8054
6	ADH1	RsaI	18.6606									6	ADH1	RsaI	18.4924									6	ADH1	RsaI	20.0575									6	ADH1	RsaI	20.7532
6	640bp	RsaI	23.4542	23.3656	0.00403357	0.000172628						6	640bp	RsaI	23.0381	22.9391	0.166988	0.00727961						6	640bp	RsaI	24.3408	24.6393	0.153792	0.00624173						6	640bp	RsaI	25.4025	25.5083	0.0104048	0.000407899
6	640bp	RsaI	23.3185									6	640bp	RsaI	22.7716									6	640bp	RsaI	24.6798									6	640bp	RsaI	25.5685
6	640bp	RsaI	23.3242									6	640bp	RsaI	23.0077									6	640bp	RsaI	24.8973									6	640bp	RsaI	25.5538

## Sheet: Ddc2-Rad53 640bp
Biological replicate 1												Biological Replicate 2												Biological Replicate 3												Biological Replicate 4
Time	Amplicon	Digest	Cq	Mean	SD	COV		Primer efficiencies				Time	Amplicon	Digest	Cq	Mean	SD	COV		Primer efficiencies				Time	Amplicon	Digest	Cq	Mean	SD	COV		Primer efficiencies				Time	Amplicon	Digest	Cq	Mean	SD	COV		Primer efficiencies
0	HOcs	none	20.4018	20.0996	0.305042	0.0151765		HOcs	2.01			0	HOcs	none	20.2693	20.1826	0.120955	0.00599304		HOcs	2.01			0	HOcs	none	20.1552	19.9879	0.151167	0.0075629		HOcs	2.01			0	HOcs	none	19.7289	19.7286	0.0771013	0.0039081		HOcs	2.01
0	HOcs	none	19.7918					ADH1	1.98			0	HOcs	none	20.234					ADH1	1.98			0	HOcs	none	19.861					ADH1	1.98			0	HOcs	none	19.8056					ADH1	1.98
0	HOcs	none	20.105					640bp	1.96			0	HOcs	none	20.0444					640bp	1.96			0	HOcs	none	19.9476					640bp	1.96			0	HOcs	none	19.6514					640bp	1.96
0	ADH1	none	18.0699	18.1696	0.105759	0.00582064						0	ADH1	none	18.409	18.395	0.111167	0.00604334						0	ADH1	none	18.3402	18.3171	0.0342973	0.00187242						0	ADH1	none	18.0579	18.0164	0.200536	0.0111308		5kb	2.01
0	ADH1	none	18.1584									0	ADH1	none	18.4985									0	ADH1	none	18.3334									0	ADH1	none	18.1928					10kb	2.04
0	ADH1	none	18.2805									0	ADH1	none	18.2775									0	ADH1	none	18.2777									0	ADH1	none	17.7983
0	640bp	none	18.9794	19.0409	0.0706908	0.00371258		Calculate HOcs cut fraction				0	640bp	none	19.4138	19.3028	0.108249	0.00560793		Calculate HOcs cut fraction				0	640bp	none	18.9455	18.9813	0.0351011	0.00184924		Calculate HOcs cut fraction				0	640bp	none	18.5907	18.6301	0.0747734	0.00401358		Calculate HOcs cut fraction
0	640bp	none	19.0251									0	640bp	none	19.2969									0	640bp	none	19.0156									0	640bp	none	18.7164
0	640bp	none	19.1181					Cut	HOcs			0	640bp	none	19.1976					Cut	HOcs			0	640bp	none	18.9829					Cut	HOcs			0	640bp	none	18.5833					Cut	HOcs
0	640bp	RsaI	26.3982	26.506	0.245073	0.00924595		Ref	ADH1			0	640bp	RsaI	25.8328	25.8847	0.0458863	0.00177272		Ref	ADH1			0	640bp	RsaI	24.9151	24.8657	0.142516	0.00573144		Ref	ADH1			0	640bp	RsaI	25.2944	25.1425	0.194265	0.00772659		Ref	ADH1
0	640bp	RsaI	26.3333									0	640bp	RsaI	25.9015									0	640bp	RsaI	24.705									0	640bp	RsaI	25.2094
0	640bp	RsaI	26.7865					Time	Fraction			0	640bp	RsaI	25.9198					Time	Fraction			0	640bp	RsaI	24.9769					Time	Fraction			0	640bp	RsaI	24.9236					Time	Fraction
1	HOcs	none	24.2005	23.8826	0.302896	0.0126827		0	0			1	HOcs	none	25.9643	25.8604	0.0902841	0.0034912		0	0			1	HOcs	none	23.4928	23.5129	0.053881	0.00229155		0	0			1	HOcs	none	23.5465	23.5535	0.226906	0.00963363		0	0
1	HOcs	none	23.8501					1	0.928751			1	HOcs	none	25.8161					1	0.979398			1	HOcs	none	23.472					1	0.92135			1	HOcs	none	23.7839					1	0.937041
1	HOcs	none	23.5973					2	0.936455			1	HOcs	none	25.8009					2	0.989945			1	HOcs	none	23.574					2	0.94459			1	HOcs	none	23.3302					2	0.980369
1	ADH1	none	18.1769	18.1689	0.0118098	0.000650002		4	0.920201			1	ADH1	none	18.6406	18.5144	0.125352	0.00677053		4	0.99032			1	ADH1	none	18.0056	18.1973	0.186539	0.0102509		4	0.9373			1	ADH1	none	18.0194	17.8774	0.134374	0.00751646		4	0.988642
1	ADH1	none	18.1553					6	0.921474			1	ADH1	none	18.3899					6	0.988505			1	ADH1	none	18.208					6	0.949608			1	ADH1	none	17.8604					6	0.989403
1	ADH1	none	18.1744									1	ADH1	none	18.5126									1	ADH1	none	18.3783									1	ADH1	none	17.7522
1	640bp	none	19.2377	19.0931	0.145305	0.00761035		Calculate resected fraction				1	640bp	none	19.0524	18.8058	0.219327	0.0116628		Calculate resected fraction				1	640bp	none	18.5109	18.5889	0.112821	0.00606927		Calculate resected fraction				1	640bp	none	18.1665	18.1612	0.0855475	0.00471044		Calculate resected fraction
1	640bp	none	18.9471									1	640bp	none	18.7321									1	640bp	none	18.7183									1	640bp	none	18.244
1	640bp	none	19.0945					Cut	640bp			1	640bp	none	18.6328					Cut	640bp			1	640bp	none	18.5375					Cut	640bp			1	640bp	none	18.0732					Cut	640bp
1	640bp	RsaI	21.3456	21.2967	0.122261	0.00574083		Ref	ADH1			1	640bp	RsaI	20.9944	20.9524	0.143721	0.00685938		Ref	ADH1			1	640bp	RsaI	20.9424	20.8694	0.109497	0.00524676		Ref	ADH1			1	640bp	RsaI	21.3677	21.3895	0.0925267	0.0043258		Ref	ADH1
1	640bp	RsaI	21.1576									1	640bp	RsaI	21.0705									1	640bp	RsaI	20.7435									1	640bp	RsaI	21.4909
1	640bp	RsaI	21.387					Time	Fraction			1	640bp	RsaI	20.7924					Time	Fraction			1	640bp	RsaI	20.9222					Time	Fraction			1	640bp	RsaI	21.3098					Time	Fraction
2	HOcs	none	24.3484	24.1638	0.363115	0.0150272		0	0			2	HOcs	none	26.9583	26.8232	0.158215	0.00589845		0	0			2	HOcs	none	23.7754	23.8718	0.136577	0.00572125		0	0			2	HOcs	none	25.3021	25.3478	0.0824289	0.00325192		0	0
2	HOcs	none	23.9792					1	0.398352			2	HOcs	none	26.688					1	0.389699			2	HOcs	none	23.9683					1	0.384909			2	HOcs	none	25.3935					1	0.218248
2	HOcs	none	23.6222					2	0.677325			2	HOcs	none	26.6806					2	0.846347			2	HOcs	none	23.7043					2	0.707059			2	HOcs	none	25.2289					2	0.648538
2	ADH1	none	18.5159	18.2887	0.198266	0.0108409		4	0.783285			2	ADH1	none	18.6163	18.4482	0.150665	0.0081669		4	0.84985			2	ADH1	none	18.0776	18.0514	0.0418947	0.00232086		4	0.769343			2	ADH1	none	18.1435	18.0051	0.130931	0.00727187		4	0.896813
2	ADH1	none	18.1996					6	0.833597			2	ADH1	none	18.3252					6	0.958787			2	ADH1	none	18.0735					6	0.808002			2	ADH1	none	17.9884					6	0.864001
2	ADH1	none	18.1507									2	ADH1	none	18.4033									2	ADH1	none	18.0031									2	ADH1	none	17.8833
2	640bp	none	20.1752	19.8039	0.401482	0.0202728						2	640bp	none	19.6964	19.607	0.0883919	0.00450817						2	640bp	none	19.3518	19.3058	0.0979384	0.00507299						2	640bp	none	19.0653	19.0246	0.0657729	0.00345725
2	640bp	none	19.3779									2	640bp	none	19.5196									2	640bp	none	19.1934									2	640bp	none	19.0598
2	640bp	none	19.8587									2	640bp	none	19.6051									2	640bp	none	19.3723									2	640bp	none	18.9487
2	640bp	RsaI	21.1238	20.9436	0.245252	0.0117101						2	640bp	RsaI	20.1381	20.0933	0.151789	0.00755424						2	640bp	RsaI	20.3755	20.3318	0.038625	0.00189973						2	640bp	RsaI	20.2794	20.159	0.153342	0.0076066
2	640bp	RsaI	20.6643									2	640bp	RsaI	20.2176									2	640bp	RsaI	20.3023									2	640bp	RsaI	19.9864
2	640bp	RsaI	21.0427									2	640bp	RsaI	19.9241									2	640bp	RsaI	20.3176									2	640bp	RsaI	20.2113
4	HOcs	none	24.6992	24.3297	0.320559	0.0131756						4	HOcs	none	27.1367	26.8741	0.22742	0.00846243						4	HOcs	none	24.2439	24.2372	0.0187234	0.000772506						4	HOcs	none	26.5498	26.4782	0.128616	0.00485745
4	HOcs	none	24.1631									4	HOcs	none	26.7434									4	HOcs	none	24.2517									4	HOcs	none	26.5551
4	HOcs	none	24.1267									4	HOcs	none	26.7422									4	HOcs	none	24.2161									4	HOcs	none	26.3297
4	ADH1	none	18.9577	18.7917	0.152209	0.00809979						4	ADH1	none	18.3997	18.4446	0.0876849	0.00475397						4	ADH1	none	18.6808	18.6058	0.0821911	0.0044175						4	ADH1	none	18.4956	18.3594	0.119845	0.00652775
4	ADH1	none	18.7586									4	ADH1	none	18.3884									4	ADH1	none	18.6187									4	ADH1	none	18.27
4	ADH1	none	18.6587									4	ADH1	none	18.5456									4	ADH1	none	18.5179									4	ADH1	none	18.3125
4	640bp	none	20.8297	20.7094	0.159418	0.00769786						4	640bp	none	20.3011	20.3391	0.0352492	0.00173308						4	640bp	none	20.1515	20.0851	0.162882	0.00810957						4	640bp	none	20.3908	20.3415	0.0705161	0.00346661
4	640bp	none	20.5286									4	640bp	none	20.3708									4	640bp	none	20.2044									4	640bp	none	20.2607
4	640bp	none	20.7699									4	640bp	none	20.3453									4	640bp	none	19.8996									4	640bp	none	20.373
4	640bp	RsaI	21.5807	21.5619	0.159478	0.00739629						4	640bp	RsaI	20.9436	20.8138	0.13866	0.00666194						4	640bp	RsaI	20.8813	20.9366	0.117739	0.00562358						4	640bp	RsaI	20.6751	20.6799	0.0476467	0.00230401
4	640bp	RsaI	21.3938									4	640bp	RsaI	20.83									4	640bp	RsaI	21.0718									4	640bp	RsaI	20.6349
4	640bp	RsaI	21.7111									4	640bp	RsaI	20.6677									4	640bp	RsaI	20.8566									4	640bp	RsaI	20.7298
6	HOcs	none		23.9617	0.0533197	0.0022252						6	HOcs	none	26.9118	26.9168	0.0751332	0.00279131						6	HOcs	none	24.2124	24.3232	0.0989412	0.00406778						6	HOcs	none	26.7581	26.8628	0.104032	0.00387271
6	HOcs	none	23.924									6	HOcs	none	26.8443									6	HOcs	none	24.3543									6	HOcs	none	26.8643
6	HOcs	none	23.9994									6	HOcs	none	26.9943									6	HOcs	none	24.4028									6	HOcs	none	26.9662
6	ADH1	none	18.3792	18.3921	0.0342474	0.00186207						6	ADH1	none	18.7176	18.7398	0.0498939	0.00266245						6	ADH1	none	18.2317	18.3737	0.12338	0.00671505						6	ADH1	none	18.9127	18.6509	0.23904	0.0128165
6	ADH1	none	18.3661									6	ADH1	none	18.7049									6	ADH1	none	18.4349									6	ADH1	none	18.4442
6	ADH1	none	18.4309									6	ADH1	none	18.797									6	ADH1	none	18.4545									6	ADH1	none	18.5959
6	640bp	none	20.7541	20.6968	0.0499531	0.00241357						6	640bp	none	20.5651	20.6104	0.0640459	0.00310746						6	640bp	none	20.0831	20.1741	0.192107	0.00952247						6	640bp	none	20.855	20.8565	0.0154593	0.00074122
6	640bp	none	20.6627									6	640bp	none	20.6836									6	640bp	none	20.3948									6	640bp	none	20.8419
6	640bp	none	20.6735									6	640bp	none	20.5823									6	640bp	none	20.0443									6	640bp	none	20.8727
6	640bp	RsaI	21.4916	21.3987	0.12967	0.00605974						6	640bp	RsaI	20.7638	20.7657	0.052835	0.00254433						6	640bp	RsaI	20.8925	20.8786	0.0577046	0.00276381						6	640bp	RsaI	21.2858	21.291	0.00456877	0.000214587
6	640bp	RsaI	21.2505									6	640bp	RsaI	20.8195									6	640bp	RsaI	20.9281									6	640bp	RsaI	21.2942
6	640bp	RsaI	21.4538									6	640bp	RsaI	20.7139									6	640bp	RsaI	20.8152									6	640bp	RsaI	21.293

## Sheet: exo1 sgs1 Ddc2-Rad53 640bp
Biological replicate 1												Biological Replicate 2												Biological Replicate 3												Biological Replicate 4
Time	Amplicon	Digest	Cq	Mean	SD	COV		Primer efficiencies				Time	Amplicon	Digest	Cq	Mean	SD	COV		Primer efficiencies				Time	Amplicon	Digest	Cq	Mean	SD	COV		Primer efficiencies				Time	Amplicon	Digest	Cq	Mean	SD	COV		Primer efficiencies
0	HOcs	none	22.8914	22.4475	0.384501	0.0171289		HOcs	2.01			0	HOcs	none	22.7711	22.5205	0.267801	0.0118914		HOcs	2.01			0	HOcs	none	22.615	22.385	0.225033	0.0100528		HOcs	2.01			0	HOcs	none	22.0441	22.186	0.193323	0.00871372		HOcs	2.01
0	HOcs	none	22.2329					ADH1	1.98			0	HOcs	none	22.5519					ADH1	1.98			0	HOcs	none	22.1653					ADH1	1.98			0	HOcs	none	22.1078					ADH1	1.98
0	HOcs	none	22.2182					640bp	1.96			0	HOcs	none	22.2383					640bp	1.96			0	HOcs	none	22.3748					640bp	1.96			0	HOcs	none	22.4062					640bp	1.96
0	ADH1	none	20.5914	20.4202	0.175562	0.00859745						0	ADH1	none	20.4467	20.5451	0.121417	0.0059098						0	ADH1	none	20.5218	20.4711	0.0834205	0.00407503						0	ADH1	none	20.2265	20.4409	0.212407	0.0103913
0	ADH1	none	20.2406									0	ADH1	none	20.6808									0	ADH1	none	20.5168									0	ADH1	none	20.6512
0	ADH1	none	20.4286									0	ADH1	none	20.5078									0	ADH1	none	20.3749									0	ADH1	none	20.4449
0	640bp	none	21.3952	21.5312	0.271073	0.0125898		Calculate HOcs cut fraction				0	640bp	none	21.6968	21.5723	0.116469	0.00539899		Calculate HOcs cut fraction				0	640bp	none	21.5306	21.5121	0.0305101	0.00141827		Calculate HOcs cut fraction				0	640bp	none	21.4688	21.4724	0.012148	0.000565752		Calculate HOcs cut fraction
0	640bp	none	21.3551									0	640bp	none	21.4659									0	640bp	none	21.5289									0	640bp	none	21.4859
0	640bp	none	21.8433					Cut	HOcs			0	640bp	none	21.5543					Cut	HOcs			0	640bp	none	21.4769					Cut	HOcs			0	640bp	none	21.4624					Cut	HOcs
0	640bp	RsaI	27.7512	27.9973	0.33328	0.011904		Ref	ADH1			0	640bp	RsaI	28.621	28.5589	0.0729104	0.00255299		Ref	ADH1			0	640bp	RsaI	27.5411	27.622	0.120147	0.0043497		Ref	ADH1			0	640bp	RsaI	26.2579	26.256	0.0714853	0.00272262		Ref	ADH1
0	640bp	RsaI	27.8642									0	640bp	RsaI	28.4786									0	640bp	RsaI	27.5648									0	640bp	RsaI	26.3266
0	640bp	RsaI	28.3766					Time	Fraction			0	640bp	RsaI	28.577					Time	Fraction			0	640bp	RsaI	27.7601					Time	Fraction			0	640bp	RsaI	26.1836					Time	Fraction
1	HOcs	none	23.7641	23.3788	0.335236	0.0143393		0	0			1	HOcs	none	23.4862	23.2812	0.177616	0.00762918		0	0			1	HOcs	none	23.571	23.4107	0.200071	0.00854611		0	0			1	HOcs	none	22.9355	23.0401	0.0914749	0.00397024		0	0
1	HOcs	none	23.1537					1	0.513256			1	HOcs	none	23.1749					1	0.526833			1	HOcs	none	23.1865					1	0.546079			1	HOcs	none	23.0799					1	0.571934
1	HOcs	none	23.2186					2	0.733044			1	HOcs	none	23.1824					2	0.735396			1	HOcs	none	23.4747					2	0.72326			1	HOcs	none	23.105					2	0.737615
1	ADH1	none	20.3741	20.318	0.116937	0.00575535		4	0.762289			1	ADH1	none	20.3793	20.2271	0.134231	0.00663622		4	0.77416			1	ADH1	none	20.2868	20.3632	0.0699501	0.00343513		4	0.749437			1	ADH1	none	20.1485	20.0717	0.13252	0.00660236		4	0.802043
1	ADH1	none	20.1836					6	0.827965			1	ADH1	none	20.1255					6	0.813309			1	ADH1	none	20.4241					6	0.810226			1	ADH1	none	20.1478					6	0.865285
1	ADH1	none	20.3963									1	ADH1	none	20.1765									1	ADH1	none	20.3786									1	ADH1	none	19.9186
1	640bp	none	21.1111	21.2203	0.150945	0.00711325		Calculate resected fraction				1	640bp	none	21.0085	21.0343	0.134771	0.00640719		Calculate resected fraction				1	640bp	none	21.285	21.263	0.0498172	0.0023429		Calculate resected fraction				1	640bp	none	21.1263	21.0601	0.0648204	0.00307788		Calculate resected fraction
1	640bp	none	21.1573									1	640bp	none	20.9143									1	640bp	none	21.2981									1	640bp	none	21.057
1	640bp	none	21.3926					Cut	640bp			1	640bp	none	21.1801					Cut	640bp			1	640bp	none	21.206					Cut	640bp			1	640bp	none	20.9968					Cut	640bp
1	640bp	RsaI	27.8598	28.004	0.161115	0.00575328		Ref	ADH1			1	640bp	RsaI	27.4396	27.4974	0.0734633	0.00267164		Ref	ADH1			1	640bp	RsaI	28.0343	27.9046	0.213938	0.00766676		Ref	ADH1			1	640bp	RsaI	27.0314	26.9986	0.136228	0.00504575		Ref	ADH1
1	640bp	RsaI	27.9743									1	640bp	RsaI	27.4726									1	640bp	RsaI	28.0219									1	640bp	RsaI	27.1154
1	640bp	RsaI	28.1779					Time	Fraction			1	640bp	RsaI	27.5801					Time	Fraction			1	640bp	RsaI	27.6577					Time	Fraction			1	640bp	RsaI	26.8489					Time	Fraction
2	HOcs	none	24.0486	24.0755	0.0492777	0.0020468		0	0			2	HOcs	none	24.6217	24.3917	0.314059	0.0128757		0	0			2	HOcs	none	23.9419	23.9071	0.0553051	0.00231334		0	0			2	HOcs	none	23.7542	23.8124	0.0602885	0.00253181		0	0
2	HOcs	none	24.1025					1	0.0401438			2	HOcs	none	24.1617					1	0.0484063			2	HOcs	none	23.8722					1	0.0414748			2	HOcs	none	23.8706					1	0.0631258
2	HOcs	none	24.0041					2	0.0468374			2	HOcs	none	24.0213					2	0.0634763			2	HOcs	none	23.8327					2	0.0433829			2	HOcs	none	23.7853					2	0.0772047
2	ADH1	none	20.1936	20.1507	0.0611165	0.00303297		4	0.0769394			2	ADH1	none	20.7193	20.5112	0.201653	0.00983134		4	0.0857934			2	ADH1	none	20.1082	20.146	0.148791	0.00738564		4	0.0728881			2	ADH1	none	20.1174	20.1444	0.0316022	0.00156878		4	0.174669
2	ADH1	none	20.1778					6	0.199384			2	ADH1	none	20.3166					6	0.20127			2	ADH1	none	20.3101					6	0.187871			2	ADH1	none	20.1367					6	0.277563
2	ADH1	none	20.0807									2	ADH1	none	20.4977									2	ADH1	none	20.0198									2	ADH1	none	20.1792
2	640bp	none	21.2018	21.0831	0.143623	0.00681226						2	640bp	none	21.257	21.3048	0.266726	0.0125195						2	640bp	none	21.3292	21.0323	0.259916	0.0123579						2	640bp	none	21.074	21.0908	0.0159741	0.000757396
2	640bp	none	20.9234									2	640bp	none	21.0652									2	640bp	none	20.8461									2	640bp	none	21.0928
2	640bp	none	21.124									2	640bp	none	21.5922									2	640bp	none	20.9216									2	640bp	none	21.1057
2	640bp	RsaI	27.0927	27.0976	0.0077917	0.000287542						2	640bp	RsaI	26.688	26.8535	0.28721	0.0106954						2	640bp	RsaI	27.3941	27.1829	0.182949	0.0067303						2	640bp	RsaI	26.3694	26.3363	0.0747669	0.00283893
2	640bp	RsaI	27.0935									2	640bp	RsaI	26.6873									2	640bp	RsaI	27.0827									2	640bp	RsaI	26.3888
2	640bp	RsaI	27.1066									2	640bp	RsaI	27.1851									2	640bp	RsaI	27.072									2	640bp	RsaI	26.2507
4	HOcs	none	24.2996	24.3569	0.0504559	0.00207152						4	HOcs	none	24.7151	24.3191	0.345509	0.0142073						4	HOcs	none	24.3142	24.2298	0.0945411	0.00390186						4	HOcs	none	24.2802	24.2765	0.0861023	0.00354673
4	HOcs	none	24.3767									4	HOcs	none	24.0787									4	HOcs	none	24.2475									4	HOcs	none	24.3607
4	HOcs	none	24.3945									4	HOcs	none	24.1636									4	HOcs	none	24.1277									4	HOcs	none	24.1886
4	ADH1	none	20.1686	20.2684	0.162713	0.0080279						4	ADH1	none	20.2853	20.2052	0.0738153	0.00365329						4	ADH1	none	20.357	20.3304	0.099739	0.00490591						4	ADH1	none	20.3794	20.2062	0.149963	0.0074216
4	ADH1	none	20.4562									4	ADH1	none	20.1399									4	ADH1	none	20.4141									4	ADH1	none	20.121
4	ADH1	none	20.1805									4	ADH1	none	20.1903									4	ADH1	none	20.22									4	ADH1	none	20.1184
4	640bp	none	21.4555	21.3809	0.070948	0.00331829						4	640bp	none	21.1267	21.2167	0.246703	0.0116278						4	640bp	none	21.4801	21.4034	0.123074	0.00575018						4	640bp	none	21.0862	21.1636	0.177182	0.00837202
4	640bp	none	21.373									4	640bp	none	21.0277									4	640bp	none	21.2615									4	640bp	none	21.0383
4	640bp	none	21.3143									4	640bp	none	21.4958									4	640bp	none	21.4687									4	640bp	none	21.3663
4	640bp	RsaI	26.694	26.5813	0.158158	0.00594999						4	640bp	RsaI	26.0905	26.2263	0.154625	0.0058958						4	640bp	RsaI	26.7638	26.7125	0.0453392	0.0016973						4	640bp	RsaI	24.8776	25.0064	0.142778	0.00570967
4	640bp	RsaI	26.6493									4	640bp	RsaI	26.1939									4	640bp	RsaI	26.6962									4	640bp	RsaI	24.9816
4	640bp	RsaI	26.4005									4	640bp	RsaI	26.3946									4	640bp	RsaI	26.6776									4	640bp	RsaI	25.1599
6	HOcs	none	24.326	24.3875	0.0799818	0.00327963						6	HOcs	none	24.7024	24.5206	0.164947	0.00672687						6	HOcs	none	24.3121	24.1274	0.162622	0.00674016						6	HOcs	none	24.6547	24.6655	0.101528	0.00411618
6	HOcs	none	24.3585									6	HOcs	none	24.3805									6	HOcs	none	24.0642									6	HOcs	none	24.772
6	HOcs	none	24.4779									6	HOcs	none	24.4789									6	HOcs	none	24.0058									6	HOcs	none	24.5698
6	ADH1	none	19.7308	19.8263	0.146182	0.00737312						6	ADH1	none	20.1635	20.1324	0.0269399	0.00133814						6	ADH1	none	19.9381	19.8189	0.105778	0.00533724						6	ADH1	none	20.3591	20.0404	0.301907	0.015065
6	ADH1	none	19.9946									6	ADH1	none	20.1169									6	ADH1	none	19.7361									6	ADH1	none	19.7587
6	ADH1	none	19.7535									6	ADH1	none	20.1168									6	ADH1	none	19.7825									6	ADH1	none	20.0033
6	640bp	none	21.308	21.1988	0.094613	0.00446313						6	640bp	none	21.2459	21.2529	0.0936838	0.00440805						6	640bp	none	21.1653	21.1653	0.153849	0.00726895						6	640bp	none	21.1632	21.3205	0.27465	0.0128819
6	640bp	none	21.1473									6	640bp	none	21.1629									6	640bp	none	21.0114									6	640bp	none	21.1607
6	640bp	none	21.1411									6	640bp	none	21.3499									6	640bp	none	21.3191									6	640bp	none	21.6377
6	640bp	RsaI	24.8502	24.7775	0.14008	0.0056535						6	640bp	RsaI	24.6482	24.8453	0.171566	0.00690537						6	640bp	RsaI	24.964	24.875	0.0786104	0.00316022						6	640bp	RsaI	24.2034	24.2801	0.183193	0.00754497
6	640bp	RsaI	24.8663									6	640bp	RsaI	24.9267									6	640bp	RsaI	24.8459									6	640bp	RsaI	24.1477
6	640bp	RsaI	24.616									6	640bp	RsaI	24.9611									6	640bp	RsaI	24.8151									6	640bp	RsaI	24.4892
