# Supplementary material for: Long-range DNA end resection supports homologous recombination by checkpoint activation rather than extensive homology generation
Source: eLife journal article supplement (doi:10.7554/elife.84322), 2023-06-30
Supplement: supp [file Fig5_S1- source data.xlsx]

## Sheet: Figure 5
Genotype	Culture	Plate	CFU (YPAD)	% white	Average CFU (YPAD)	CFU (YPA + Gal)	% red	Average CFU (YPA + Gal)	Adjusted CFU (YPA + Gal)	Survival frequency	Average survival frequency	ST DEV
WT Chr 3 donor	1	1	369	1.08401	376	310	5.80645	327.5	327.5	0.871011	0.905719	0.0786746
		2	383	2.87206		345	5.7971
	2	1	138	3.62319	144.5	120	4.16667	131	131	0.906574
		2	151	1.98675		142	3.52113
	3	1	197	1.01523	186	157	1.91083	173.5	173.5	0.932796
		2	175	6.28571		190	4.73684
	4	1	141	4.25532	129.5	97	2.06186	102.5	102.5	0.791506
		2	118	5.08475		108	4.62963
	5	1	322	1.5528	321.5	312	2.5641	289.5	289.5	0.900467
		2	321	1.86916		267	3.37079
	6	1	238	0.840336	219	222	3.6036	226	226	1.03196
		2	200	2.5		230	3.47826
Genotype	Culture	Plate	CFU (YPAD)	% white	Average CFU (YPAD)	CFU (YPA + Gal)	% red	Average CFU (YPA + Gal)	Adjusted CFU (YPA + Gal)	Survival frequency	Average survival frequency	ST DEV	*plated 10x more cells on YPA + Gal compared to YPAD
exo1sgs1 Chr 3 donor	1	1	137	0	116	107	0	95	9.5	0.0818966	0.0777871	0.025245
		2	95	0		83	0
	2	1	566	0	572.5	304	7.56579	334.5	33.45	0.0584279
		2	579	0		365	4.93151
	3	1	484	0	479.5	369	2.16802	414	41.4	0.0863399
		2	475	0		459	2.83224
	4	1	134	2.23881	131	52	0	65	6.5	0.0496183
		2	128	1.5625		78	3.84615
	5	1	160	2.5	169.5	79	3.79747	91	9.1	0.0536873
		2	179	2.7933		103	7.76699
	6	1	102	0	104.5	82	1.21951	100.5	10.05	0.0961722
		2	107	0		119	0.840336
	7	1	40	17.5	49	61	0	58	5.8	0.118367
		2	58	3.44828		55	1.81818
Genotype	Culture	Plate	CFU (YPAD)	% white	Average CFU (YPAD)	CFU (YPA + Gal)	% red	Average CFU (YPA + Gal)	Adjusted CFU (YPA + Gal)	Survival frequency	Average survival frequency	ST DEV
WT Chr 4 donor	1	1	231	0.4329	238.5	221	2.71493	225.5	225.5	0.945493	0.95736	0.0590848
		2	246	0		230	5.21739
	2	1	541	0	557.5	522	4.78927	494	494	0.886099
		2	574	0.348432		466	8.15451
	3	1	318	0.314465	333	311	2.89389	321	321	0.963964
		2	348	0.287356		331	3.92749
	4	1	161	0.621118	163.5	141	2.12766	154	154	0.941896
		2	166	2.40964		167	3.59281
	5	1	213	2.34742	192.5	187	3.74332	202	202	1.04935
		2	172	3.48837		217	1.84332
Genotype	Culture	Plate	CFU (YPAD)	% white	Average CFU (YPAD)	CFU (YPA + Gal)	% red	Average CFU (YPA + Gal)	Adjusted CFU (YPA + Gal)	Survival frequency	Average survival frequency	ST DEV	*plated 10x more cells on YPA + Gal compared to YPAD
exo1sgs1 Chr 4 donor	1	1	165	0	174.5	200	9.5	220	22	0.126074	0.135456	0.042536
		2	184	0		240	9.58333
	2	1	146	0.684932	141.5	119	10.084	104	10.4	0.0734982
		2	137	0		89	4.49438
	3	1	201	0	192	277	8.30325	275	27.5	0.143229
		2	183	0		273	8.42491
	4	1	72	1.38889	66.5	85	0	99	9.9	0.148872
		2	61	1.63934		113	0
	5	1	83	0	81	166	0	164.5	16.45	0.203086
		2	79	1.26582		163	0
	6	1	56	3.57143	44.5	56	0	52.5	5.25	0.117978
		2	33	0		49	0
Genotype	Culture	Plate	CFU (YPAD)	% white	Average CFU (YPAD)	CFU (YPA + Gal)	% red	Average CFU (YPA + Gal)	Adjusted CFU (YPA + Gal)	Survival frequency	Average survival frequency	ST DEV
WT Chr 8 donor	1	1	380	0.789474	394	268	5.59701	249.5	249.5	0.633249	0.738727	0.134179
		2	408	0.490196		231	8.65801
	2	1	414	0.483092	396	264	6.81818	274.5	274.5	0.693182
		2	378	0		285	6.66667
	3	1	587	0	580.5	575	11.4783	516.5	516.5	0.88975
		2	574	0.174216		458	7.86026
	4	1	717	0	739.5	565	7.25664	579	579	0.782961
		2	762	0		593	7.9258
Genotype	Culture	Plate	CFU (YPAD)	% white	Average CFU (YPAD)	CFU (YPA + Gal)	% red	Average CFU (YPA + Gal)	Adjusted CFU (YPA + Gal)	Survival frequency	Average survival frequency	ST DEV	*plated 10x more cells on YPA + Gal compared to YPAD
exo1sgs1 Chr 8 donor	1	1	112	0.892857	96	59	3.38983	50	5	0.0520833	0.041568	0.00911039
		2	80	0		41	2.43902
	2	1	165	1.21212	172	73	4.10959	62	6.2	0.0360465
		2	179	0.558659		51	3.92157
	3	1	125	0	108	42	0	39.5	3.95	0.0365741
		2	91	1.0989		37	2.7027
	4	1	225	1.33333	230	72	2.77778	72.5	7.25	0.0315217
		2	235	0.851064		73	0
Genotype	Culture	Plate	CFU (YPAD)	% white	Average CFU (YPAD)	CFU (YPA + Gal)	% red	Average CFU (YPA + Gal)	Adjusted CFU (YPA + Gal)	Survival frequency	Average survival frequency	ST DEV
WT Chr 16 donor	1	1	456	1.53509	441.5	443	3.16027	451.5	451.5	1.02265	1.00394	0.102424
		2	427	1.63934		460	3.69565
	2	1	363	2.47934	371.5	332	4.51807	325	325	0.874832
		2	380	0.789474		318	4.40252
	3	1	266	1.12782	273	273	5.12821	271.5	271.5	0.994505
		2	280	1.42857		270	3.33333
	4	1	244	1.63934	258.5	308	3.8961	290.5	290.5	1.12379
		2	273	1.0989		273	3.663
Genotype	Culture	Plate	CFU (YPAD)	% white	Average CFU (YPAD)	CFU (YPA + Gal)	% red	Average CFU (YPA + Gal)	Adjusted CFU (YPA + Gal)	Survival frequency	Average survival frequency	ST DEV	*plated 10x more cells on YPA + Gal compared to YPAD
exo1sgs1 Chr 16 donor	1	1	95	0	87.5	108	0	112	11.2	0.128	0.128405	0.0223305
		2	80	2.5		116	0
	2	1	107	0	107	167	0	161.5	16.15	0.150935
		2				156	0.641026
	3	1	185	0	215	231	0	228.5	22.85	0.106279
		2	245	0.408163		226	0
Genotypes compared	p-value	indicator
WT-exo1∆ sgs1∆ Chr 3	3.60863e-07	****
WT-exo1∆ sgs1∆ Chr 4	2.47644e-08	****
WT-exo1∆ sgs1∆ Chr 8	0.000993454	***
WT-exo1∆ sgs1∆ Chr 16	0.00023803	***
WT Chr 8 - Chr 3	0.0603444	ns
WT Chr 8 - Chr 4	0.0251279	*
WT Chr 8 - Chr 16	0.0155379	*
exo1∆ sgs1∆ Chr 3 - Chr 4	0.0199024	*
exo1∆ sgs1∆ Chr 3 - Chr 8	0.00608194	**
exo1∆ sgs1∆ Chr 3 - Chr 16	0.0305032	*
exo1∆ sgs1∆ Chr 4 - Chr 8	0.0020619	**
exo1∆ sgs1∆ Chr 4 - Chr 16	0.754138	ns
exo1∆ sgs1∆ Chr 8 - Chr 16	0.0125677	*
