# Supplementary material for: Long-range DNA end resection supports homologous recombination by checkpoint activation rather than extensive homology generation
Source: eLife journal article supplement (doi:10.7554/elife.84322), 2023-06-30
Supplement: supp [file Fig5_S2- source data.xlsx]

## Sheet: Rad51 OE
Genotype	Culture	Plate	CFU (SC -His)	% white	Average CFU (SC -His)	CFU (SC -His + Gal)	% red	Average CFU (SC -His + Gal)	Adjusted CFU (SC -His + Gal)	Recombination frequency
Inter WT + pRS423-EV	1	1	709	0.846262	673.5	493	10.3448	531	531	0.788419
		2	638	0.15674		569	8.08436
	2	1	148	0	167	164	10.3659	157	157	0.94012
		2	186	1.07527		150	12.6667
	3	1	61	1.63934	61.5	57	8.77193	65.5	65.5	1.06504
		2	62	0		74	18.9189
	4	1	265	1.13208	249.5	216	18.5185	209	209	0.837675
		2	234	0		202	17.3267
	5	1	340	0.294118	340.5	510	11.9608	422.5	422.5	1.24082
		2	341	0		335	19.7015
	6	1	104	0	106	99	14.1414	89	89	0.839623
		2	108	1.85185		79	16.4557
	7	1	265	0.754717	260.5	189	20.6349	207.5	207.5	0.796545
		2	256	0		226	22.5664
	8	1	368	0	367	366	12.5683	351.5	351.5	0.957766
		2	366	0.273224		337	14.2433
	9	1	384	0.260417	406.5	383	12.2715	389	389	0.95695
		2	429	0		395	13.4177
	10	1	896	0.558036	932.5	827	11.1245	796.5	796.5	0.854155
		2	969	0.206398		766	9.79112
	11	1	419	0	410	371	12.6685	372.5	372.5	0.908537
		2	401	0		374	14.1711
Genotype	Culture	Plate	CFU (SC -His)	% white	Average CFU (SC -His)	CFU (SC -His + Gal)	% red	Average CFU (SC -His + Gal)	Adjusted CFU (SC -His + Gal)	Recombination frequency
Inter WT + pRS423-RAD51	1	1	273	0	289	221	13.5747	219.5	219.5	0.759516
		2	305	0		218	18.3486
	2	1	213	0	205.5	154	11.6883	152	152	0.739659
		2	198	0		150	18
	3	1	178	0	166.5	147	19.0476	135.5	135.5	0.813814
		2	155	0		124	14.5161
	4	1	154	0.649351	149	109	18.3486	108	108	0.724832
		2	144	0		107	14.9533
	5	1	331	0	326	273	17.2161	264.5	264.5	0.81135
		2	321	0		256	11.3281
	6	1	276	1.08696	268.5	238	12.1849	235	235	0.875233
		2	261	0.766284		232	12.069
	7	1	296	0	316.5	273	12.8205	263	263	0.830964
		2	337	0.296736		253	14.2292
	8	1	542	0.184502	527	526	11.0266	506	506	0.960152
		2	512	0		486	9.25926
Genotype	Culture	Plate	CFU (SC -His)	% white	Average CFU (SC -His)	CFU (SC -His + Gal)	% red	Average CFU (SC -His + Gal)	Adjusted CFU (SC -His + Gal)	Recombination frequency
Inter exo1 sgs1 + pRS423-EV	1	1	507	n/a	487	599	n/a	575.5	57.55	0.118172
		2	467	n/a		552	n/a
	2	1	220	n/a	234.5	240	n/a	263.5	26.35	0.112367
		2	249	n/a		287	n/a
	3	1	31	0	31.5	58	15.5172	46.5	4.65	0.147619
		2	32	0		35	20
	4	1	50	0	37.5	46	10.8696	45.5	4.55	0.121333
		2	25	0		45	11.1111
	5	1	87	0	78.5	211	6.63507	229.5	22.95	0.292357
		2	70	0		248	3.22581
	6	1	74	0	71	128	7.03125	130	13	0.183099
		2	68	0		132	9.09091
	7	1	84	0	87	216	7.87037	220	22	0.252874
		2	90	0		224	9.375
	8	1	84	0	88	149	12.0805	143.5	14.35	0.163068
		2	92	0		138	9.42029
	9	1	174	0	180	277	11.9134	291	29.1	0.161667
		2	186	0		305	9.83607
	10	1	170	0	165	274	8.75912	279	27.9	0.169091
		2	160	0		284	9.50704
	11	1	128	0	132.5	211	10.9005	237.5	23.75	0.179245
		2	137	0		264	12.8788
Genotype	Culture	Plate	CFU (SC -His)	% white	Average CFU (SC -His)	CFU (SC -His + Gal)	% red	Average CFU (SC -His + Gal)	Adjusted CFU (SC -His + Gal)	Recombination frequency
Inter exo1 sgs1 + pRS423-RAD51	1	1	462	n/a	466	1098	n/a	1084	108.4	0.232618
		2	470	n/a		1070	n/a
	2	1	590	n/a	601	1730	n/a	1794.5	179.45	0.298586
		2	612	n/a		1859	n/a
	3	1	24	0	26	6	0	7.5	7.5	0.288462
		2	28	0		9	22.2222
	4	1	43	0	46	19	21.0526	18	18	0.391304
		2	49	0		17	23.5294
	5	1	43	0	40.5	124	18.5484	124	12.4	0.306173
		2	38	0		124	16.129
	6	1	67	0	69	205	14.6341	206	20.6	0.298551
		2	71	0		207	13.5266
	7	1	63	0	64	219	11.8721	206.5	20.65	0.322656
		2	65	0		194	8.24742
	8	1	100	0	100	303	6.60066	294	29.4	0.294
		2	100	0		285	11.2281
	9	1	42	0	50.5	190	23.1579	184	18.4	0.364356
		2	59	0		178	32.0225
	10	1	73	0	76	343	25.656	342	34.2	0.45
		2	79	0		341	24.3402
	11	1	95	0	101.5	338	15.9763	329	32.9	0.324138
		2	108	0		320	14.6875
	12	1	60	0	68	311	12.2186	325.5	32.55	0.478676
		2	76	0		340	17.6471
Genotypes compared	p-value	Indicator
WT+EV - WT+RAD51 OE	0.0350738	*
WT+EV - exo1∆ sgs1∆ +EV	1.47068e-10	****
WT+EV - exo1∆ sgs1∆ +RAD51 OE	1.34626e-09	****
WT+RAD51 OE - exo1∆ sgs1∆ +RAD51 OE	1.04832e-09	****
exo1∆ sgs1∆ +EV - exo1∆ sgs1∆ +RAD51 OE	4.18524e-06	****
