# Supplementary material for: Long-range DNA end resection supports homologous recombination by checkpoint activation rather than extensive homology generation
Source: eLife journal article supplement (doi:10.7554/elife.84322), 2023-06-30
Supplement: supp [file Figure 1- source data.xlsx]

## Sheet: Intrachromosomal
Genotype	Culture	Plate	CFU (YPAD)	% white	Average CFU (YPAD)	CFU (YPA + Gal)	% red	Average CFU (YPA + Gal)	Adjusted CFU (YPA + Gal)	Survival frequency	Average survival frequency	ST DEV
Intra WT	1	1	188	0.531915	177.5	195	8.20513	215	215	1.21127	1.0714	0.127683
		2	167	0.598802		235	6.38298									CFU YPA + Gal
	2	1	226	1.76991	215	169	8.28402	203.5	203.5	0.946512							1	2	3	4	5	6	7
		2	204	1.47059		238	4.20168									WT	215	203.5	184	203.5
	3	1	200	0	187.5	176	3.40909	184	184	0.981333						exo1 sgs1	108	80	88.5	162	363	381	316
		2	175	0.571429		192	4.16667									mre11	32.75	50.5	67.75	93.75
	4	1	189	1.0582	177.5	190	1.57895	203.5	203.5	1.14648
		2	166	0		217	2.76498
																Trp+ on YPA + Gal											Trp+ survival frequency
																	1	2	3	4	5	6	7					1	2	3	4	5	6	7
																WT	201.5	191.5	176	194.5							WT	1.13521	0.890698	0.938667	1.09577
Genotype	Culture	Plate	CFU (YPAD)	% white	Average CFU (YPAD)	CFU (YPA + Gal)	% red	Average CFU (YPA + Gal)	Adjusted CFU (YPA + Gal)	Survival frequency	Average survival frequency	ST DEV				exo1 sgs1	97.5	76	84	148	301	325	287				exo1 sgs1	0.724907	0.8	0.908108	0.753181	0.903904	0.783133	0.759259
Intra exo1 sgs1	1	1	124	1.6129	134.5	95	0	108	108	0.802974	0.895772	0.101762				mre11	20.25	29.75	42.25	52.5							mre11	0.256329	0.369565	0.466851	0.388889
		2	145	0.689655		121	3.30579
	2	1	103	0.970874	95	77	0	80	80	0.842105
		2	87	0		83	1.20482									Fraction Trp+ on YPA + Gal											Trp- survival frequency
	3	1	96	4.16667	92.5	96	1.04167	88.5	88.5	0.956757							1	2	3	4	5	6	7	Average				1	2	3	4	5	6	7
		2	89	1.1236		81	2.46914									WT	0.937209	0.941032	0.956522	0.955774				0.947634			WT	0.0760563	0.055814	0.0426667	0.0507042
	4	1	206	0.970874	196.5	169	1.77515	162	162	0.824427						exo1 sgs1	0.902778	0.95	0.949153	0.91358	0.829201	0.853018	0.908228	0.900851			exo1 sgs1	0.0780669	0.0421053	0.0486486	0.0712468	0.186186	0.13494	0.0767196
		2	187	0.534759		155	0.645161									mre11	0.618321	0.589109	0.623616	0.56				0.597761			mre11	0.158228	0.257764	0.281768	0.305556
	5	1	342	0.292398	333	374	1.06952	363	363	1.09009
		2	324	1.23457		352	1.42045
	6	1	372	1.88172	415	390	0.25641	381	381	0.918072																		For Supplementary Figure 1B
		2	458	1.0917		372	1.07527									Trp+ Ade+										Fraction Trp+ Ade+
	7	1	372	1.07527	378	300	1.33333	316	316	0.835979							1	2	3	4	5	6	7				1	2	3	4	5	6	7	Average
		2	384	0.78125		332	0.903614									WT	186.5	179.5	169	190						WT	0.867442	0.882064	0.918478	0.933661				0.900411
																exo1 sgs1	95.5	75.5	82.5	146	298	323.5	286			exo1 sgs1	0.884259	0.94375	0.932203	0.901235	0.820937	0.849081	0.905063	0.890933
																mre11	17.5	27	38.25	50.25						mre11	0.534351	0.534653	0.564576	0.536				0.542395
Genotype	Culture	Plate	CFU (YPAD)	% white	Average CFU (YPAD)	CFU (YPA + Gal)	% red	Average CFU (YPA + Gal)	Adjusted CFU (YPA + Gal)	Survival frequency	Average survival frequency	ST DEV				Trp+ Ade-										Fraction Trp+ Ade-
Intra mre11	1	1	68	0	79	71	9.85915	65.5	32.75	0.414557	0.621237	0.146446					1	2	3	4	5	6	7				1	2	3	4	5	6	7	Average
		2	90	0		60	10									WT	15	12	7	4.5						WT	0.0697674	0.0589681	0.0380435	0.022113				0.047223
	2	1	67	1.49254	80.5	108	7.40741	101	50.5	0.627329						exo1 sgs1	2	0.5	1.5	2	3	1.5	1			exo1 sgs1	0.0185185	0.00625	0.0169492	0.0123457	0.00826446	0.00393701	0.00316456	0.00991848
		2	94	0		94	6.38298									mre11	2.75	2.75	4	2.25						mre11	0.0839695	0.0544554	0.0590406	0.024				0.0553664
	3	1	107	1.86916	90.5	151	4.63576	135.5	67.75	0.748619
		2	74	1.35135		120	7.5									Trp- Ade+										Fraction Trp- Ade+
	4	1	121	0	135	167	3.59281	187.5	93.75	0.694444							1	2	3	4	5	6	7				1	2	3	4	5	6	7	Average
		2	149	0		208	2.40385									WT	13	12	8	9						WT	0.0604651	0.0589681	0.0434783	0.044226				0.0517844
																exo1 sgs1	10.5	4	4.5	14	60.5	54	26			exo1 sgs1	0.0972222	0.05	0.0508475	0.0864198	0.166667	0.141732	0.0822785	0.0964524
																mre11	12	20	25.5	40.75						mre11	0.366412	0.39604	0.376384	0.434667				0.393376
Genotypes compared	p-value	indicator														Trp- Ade-										Fraction Trp- Ade-
WT-exo1∆ sgs1∆	0.0628058	ns															1	2	3	4	5	6	7				1	2	3	4	5	6	7	Average
WT-mre11∆	0.00373602	**														WT	0.5	0	0	0						WT	0.00232558	0	0	0				0.000581395
exo1∆ sgs1∆-mre11∆	0.0230373	*														exo1 sgs1	0	0	0	0	1.5	2	3			exo1 sgs1	0	0	0	0	0.00413223	0.00524934	0.00949367	0.00269646
																mre11	0.5	0.75	0	0.5						mre11	0.0152672	0.0148515	0	0.00533333				0.008863

## Sheet: Interchromosomal
Genotype	Culture	Plate	CFU (YPAD)	% white	Average CFU (YPAD)	CFU (YPA + Gal)	% red	Average CFU (YPA + Gal)	Adjusted CFU (YPA + Gal)	Survival frequency	Average survival frequency	ST DEV
Inter WT	1	1	369	1.08401	376	310	5.80645	327.5	327.5	0.871011	0.905719	0.0786746
		2	383	2.87206		345	5.7971
	2	1	138	3.62319	144.5	120	4.16667	131	131	0.906574
		2	151	1.98675		142	3.52113
	3	1	197	1.01523	186	157	1.91083	173.5	173.5	0.932796
		2	175	6.28571		190	4.73684
	4	1	141	4.25532	129.5	97	2.06186	102.5	102.5	0.791506
		2	118	5.08475		108	4.62963
	5	1	322	1.5528	321.5	312	2.5641	289.5	289.5	0.900467
		2	321	1.86916		267	3.37079
	6	1	238	0.840336	219	222	3.6036	226	226	1.03196
		2	200	2.5		230	3.47826
Genotype	Culture	Plate	CFU (YPAD)	% white	Average CFU (YPAD)	CFU (YPA + Gal)	% red	Average CFU (YPA + Gal)	Adjusted CFU (YPA + Gal)	Survival frequency	Average survival frequency	ST DEV
Inter exo1 sgs1	1	1	137	0	116	107	0	95	9.5	0.0818966	0.0777871	0.025245
		2	95	0		83	0
	2	1	566	0	572.5	304	7.56579	334.5	33.45	0.0584279
		2	579	0		365	4.93151
	3	1	484	0	479.5	369	2.16802	414	41.4	0.0863399
		2	475	0		459	2.83224
	4	1	134	2.23881	131	52	0	65	6.5	0.0496183
		2	128	1.5625		78	3.84615
	5	1	160	2.5	169.5	79	3.79747	91	9.1	0.0536873
		2	179	2.7933		103	7.76699
	6	1	102	0	104.5	82	1.21951	100.5	10.05	0.0961722
		2	107	0		119	0.840336
	7	1	40	17.5	49	61	0	58	5.8	0.118367
		2	58	3.44828		55	1.81818
Genotype	Culture	Plate	CFU (YPAD)	% white	Average CFU (YPAD)	CFU (YPA + Gal)	% red	Average CFU (YPA + Gal)	Adjusted CFU (YPA + Gal)	Survival frequency	Average survival frequency	ST DEV
Inter mre11	1	1	512	0	553	1560	0.384615	1456	145.6	0.263291	0.300322	0.0800529
		2	594	0		1352	0.813609
	2	1	57	5.26316	59	108	0	99	24.75	0.419492
		2	61	0		90	0
	3	1	151	0	172	192	5.20833	186.5	46.625	0.271076
		2	193	0		181	8.28729
	4	1	144	0	146	150	8.66667	144.5	36.125	0.247432
		2	148	1.35135		139	7.19424
Genotypes compared	p-value	indicator
WT-exo1∆ sgs1∆	3.60863e-07	****
WT-mre11∆	1.26297e-05	****
exo1∆ sgs1∆-mre11∆	0.00930086	**
