# Supplementary material for: Long-range DNA end resection supports homologous recombination by checkpoint activation rather than extensive homology generation
Source: eLife journal article supplement (doi:10.7554/elife.84322), 2023-06-30
Supplement: supp [file Figure 2C- source data.xlsx]

## Sheet: Repair kinetics repeat 1
ADE+	Raw Measurements (Image J)					Inverse band intensity
	Control	Unrepaired	Repair 1	Repair 2		Control	Unrepaired	Repair 1	Repair 2				Unrepaired	Repair 1	Repair 2	Avg repair	Avg repair/cntrl		Final repair fraction
ADE+	139.43	168.188	125.547	158.766		0.00717206	0.00594573	0.00796514	0.00629858				0.174436	0.456004	0.244438	0.350221	48.8313		1.02787
	157.07	177.734	142.359	167.797		0.00636659	0.00562639	0.00702449	0.00595958				0.146346	0.365947	0.222117	0.294032	46.1836		0.972134
WT- Intra
	Control	Unrepaired	Repair 1	Repair 2		Control	Unrepaired	Repair 1	Repair 2				Unrepaired	Repair 1	Repair 2	Avg repair	Avg repair/cntrl		Final repair fraction
0	176.32	137.391	213.008	220		0.00567151	0.0072785	0.00469466	0.00454545				0.455582	0	0	0	0		0
2	160.227	150.617	206.117	214.719		0.00624115	0.00663936	0.00485161	0.00465725				0.311593	0.0251483	0.0179126	0.0215304	3.44976		0.0726151
3	161.523	166.172	191.492	208		0.00619107	0.00601786	0.00522215	0.00480769				0.213728	0.0852019	0.0423574	0.0637797	10.3019		0.216848
4	158.547	167.766	170.938	195.5		0.00630728	0.00596068	0.00585007	0.00511509				0.200724	0.183188	0.0903139	0.136751	21.6814		0.456379
6	160.25	175.703	154.711	186.523		0.00624025	0.00569142	0.00646366	0.00536127				0.159731	0.283483	0.130734	0.207109	33.1892		0.69861
8	154.016	177.977	153.648	184.914		0.00649283	0.0056187	0.00650838	0.00540792				0.142318	0.279342	0.132833	0.206088	31.7408		0.668123
WT- Inter
	Control	Unrepaired	Repair 1	Repair 2		Control	Unrepaired	Repair 1	Repair 2				Unrepaired	Repair 1	Repair 2	Avg repair	Avg repair/cntrl		Final repair fraction
0	156.352	94.859	198.758	206.125		0.00639582	0.010542	0.00503124	0.00485143				0.914238	0	0	0	0		0
2	115.492	126.828	196.164	204.336		0.00865861	0.00788469	0.00509778	0.0048939				0.368424	0.00768383	0.00490554	0.00629469	0.726986		0.0153026
3	124	138.5	181.273	194.758		0.00806452	0.00722022	0.00551654	0.00513458				0.313169	0.0601769	0.0351109	0.0476439	5.90784		0.124356
4	124.156	146.516	158.109	181.781		0.00805438	0.00682519	0.00632475	0.00550112				0.264519	0.160597	0.0806641	0.12063	14.977		0.315255
6	140.953	161.625	135.547	165.562		0.00709456	0.00618716	0.00737751	0.00604003				0.210373	0.330714	0.167538	0.249126	35.115		0.739148
8	159.422	172.234	150.156	172.578		0.00627266	0.00580605	0.00665974	0.00579448				0.177181	0.259618	0.150344	0.204981	32.6785		0.68786
exo1 sgs1- Intra
	Control	Unrepaired	Repair 1	Repair 2		Control	Unrepaired	Repair 1	Repair 2				Unrepaired	Repair 1	Repair 2	Avg repair	Avg repair/cntrl		Final repair fraction
0	130.617	75.82	181.891	192		0.00765597	0.0131891	0.0054978	0.00520833				1.10952	0	0	0	0		0
2	109.438	95.273	177.602	192.062		0.00913759	0.0104962	0.00563057	0.00520665				0.634904	0.01453	-0.000184	0.00717299	0.784998		0.0165237
3	106.383	104.922	170.508	187.344		0.0094	0.00953089	0.00586483	0.00533777				0.514493	0.0390457	0.0137703	0.026408	2.80936		0.0591352
4	116.602	122.695	158.844	181.945		0.00857618	0.00815029	0.00629548	0.00549617				0.402934	0.0930119	0.0335619	0.0632869	7.37938		0.155331
6	124.914	140.289	131.82	166.672		0.00800551	0.00712814	0.0075861	0.00599981				0.303976	0.260858	0.0988663	0.179862	22.4673		0.472922
8	136.039	150.516	120.648	160.055		0.00735083	0.00664381	0.00828858	0.00624785				0.265161	0.379654	0.141415	0.260535	35.4429		0.746049
exo1 sgs1- Inter
	Control	Unrepaired	Repair 1	Repair 2		Control	Unrepaired	Repair 1	Repair 2				Unrepaired	Repair 1	Repair 2	Avg repair	Avg repair/cntrl		Final repair fraction
0																			0
2	112.992	85.055	181.406	190.75		0.00885018	0.0117571	0.0055125	0.00524246				0.797999	0	0	0	0		0
3	114.398	100.391	181.484	191.539		0.00874141	0.00996105	0.00551013	0.00522087				0.602465	-2.36922e-06	-2.15951e-05	-1.19822e-05	-0.00137073		-2.8853e-05
4	112.859	115.586	181.914	190.75		0.00886061	0.00865157	0.0054971	0.00524246				0.446573	-1.53938e-05	0	-7.6969e-06	-0.000868665		-1.82848e-05
6	97.086	122.578	182.367	190.648		0.0103001	0.00815807	0.00548345	0.00524527				0.336249	-2.90486e-05	2.80481e-06	-1.31219e-05	-0.00127395		-2.68159e-05
8	104.141	134.453	185.18	191.102		0.00960237	0.00743754	0.00540015	0.00523281				0.285647	-0.000112346	-9.65635e-06	-6.1001e-05	-0.0063527		-0.00013372

## Sheet: Repair kinetics repeat 2
ADE+	Raw Measurements (Image J)					Inverse band intensity
	Control	Unrepaired	Repair 1	Repair 2		Control	Unrepaired	Repair 1	Repair 2				Unrepaired	Repair 1	Repair 2	Avg repair	Avg repair/cntrl		Final repair fraction
ADE+	198.058	213.833	191.911	207.938		0.00504903	0.00467655	0.00521075	0.00480913				0.0651057	0.170909	0.0979994	0.134454	26.6297		1.06677
	202.214	218.384	194.893	214.107		0.00494526	0.00457909	0.00513102	0.00467056				0.0467648	0.158373	0.0720362	0.115205	23.296		0.933226
WT- Intra
	Control	Unrepaired	Repair 1	Repair 2		Control	Unrepaired	Repair 1	Repair 2				Unrepaired	Repair 1	Repair 2	Avg repair	Avg repair/cntrl		Final repair fraction
0	195.884	165.786	230	231.786		0.00510506	0.00603187	0.00434783	0.00431432				0.329878	0	0	0	0		0
2	168.866	172.812	225.446	230.054		0.00592186	0.00578664	0.00443565	0.00434681				0.242966	0.0148308	0.00548496	0.0101579	1.71532		0.068715
3	172.473	188.304	208.42	223.232		0.00579801	0.00531056	0.004798	0.00447964				0.166046	0.0776435	0.0285132	0.0530784	9.15459		0.366729
4	172.92	198.018	195.929	216.429		0.00578302	0.00505005	0.00510389	0.00462045				0.121428	0.130739	0.0529357	0.0918371	15.8805		0.636165
6	166.955	212.804	169.464	204.732		0.00598964	0.00469916	0.00590096	0.00488443				0.0586569	0.259303	0.0951827	0.177243	29.5916		1.18543
8	166.241	214.232	168.929	202.152		0.00601536	0.00466784	0.00591965	0.00494677				0.0531989	0.261301	0.105139	0.18322	30.4587		1.22016
WT- Inter
	Control	Unrepaired	Repair 1	Repair 2		Control	Unrepaired	Repair 1	Repair 2				Unrepaired	Repair 1	Repair 2	Avg repair	Avg repair/cntrl		Final repair fraction
0	160.705	102.973	223.438	226		0.00622258	0.00971128	0.00447551	0.00442478				0.861934	0	0	0	0		0
2	131.955	162.482	219.732	225.527		0.00757834	0.00615453	0.004551	0.00443406				0.238403	0.0099605	0.00122456	0.00559253	0.737962		0.0295624
3	142.339	176.223	207.312	218.116		0.00702548	0.00567463	0.00482365	0.00458472				0.188856	0.0495529	0.0227654	0.0361591	5.14685		0.206181
4	156.188	190.277	191.054	209.054		0.00640254	0.0052555	0.00523412	0.00478345				0.141767	0.118485	0.0560206	0.087253	13.6279		0.545927
6	160.411	207.062	160.375	193.277		0.00623399	0.00482947	0.00623539	0.00517392				0.0772612	0.282303	0.120171	0.201237	32.2806		1.29315
8	162.643	209.688	164.598	194.884		0.00614844	0.00476899	0.00607541	0.00513126				0.0684994	0.260211	0.114904	0.187558	30.5049		1.22201
exo1 sgs1- Intra
	Control	Unrepaired	Repair 1	Repair 2		Control	Unrepaired	Repair 1	Repair 2				Unrepaired	Repair 1	Repair 2	Avg repair	Avg repair/cntrl		Final repair fraction
0	157.25	101.402	221.179	224		0.0063593	0.00986174	0.00452122	0.00446429				0.867063	0	0	0	0		0
2	145.312	117.402	220	223.964		0.00688174	0.00851774	0.00454545	0.004465				0.605939	0.00352086	0.000104274	0.00181257	0.263388		0.0105512
3	143.714	135.795	215.152	220.679		0.00695826	0.00736404	0.00464788	0.00453147				0.433472	0.0182017	0.00965515	0.0139284	2.00171		0.0801875
4	146.205	161.366	209.75	218.098		0.00683971	0.00619709	0.00476758	0.00458509				0.270372	0.0360184	0.0176629	0.0268407	3.92424		0.157203
6	143.527	185.223	176.438	204.92		0.00696733	0.0053989	0.00566771	0.00487995				0.150857	0.164552	0.0596595	0.112106	16.0902		0.644566
8	152.277	199.598	166.491	201.554		0.00656698	0.00501007	0.00600633	0.00496145				0.100845	0.226147	0.0757066	0.150927	22.9827		0.920677
exo1 sgs1- Inter
	Control	Unrepaired	Repair 1	Repair 2		Control	Unrepaired	Repair 1	Repair 2				Unrepaired	Repair 1	Repair 2	Avg repair	Avg repair/cntrl		Final repair fraction
0	154.562	93.571	221.643	224		0.0064699	0.0106871	0.00451176	0.00446429				0.979807	0	0	0	0		0
2	162.562	123.17	221.982	225.714		0.0061515	0.00811886	0.00450487	0.00443039				0.613027	-0.00112007	-0.00551091	-0.00331549	-0.538973		-0.021591
3	146	123.179	222.125	226		0.00684932	0.00811827	0.00450197	0.00442478				0.550484	-0.00142938	-0.00576802	-0.0035987	-0.52541		-0.0210477
4	144.232	139.304	223	226		0.00693327	0.00717854	0.0044843	0.00442478				0.40828	-0.00395989	-0.00569817	-0.00482903	-0.6965		-0.0279015
6	122.786	143.348	223.143	226		0.00814425	0.00697603	0.00448143	0.00442478				0.322707	-0.00372394	-0.0048509	-0.00428742	-0.526435		-0.0210888
8	136.188	168.991	223.536	227		0.00734279	0.00591747	0.00447355	0.00440529				0.213767	-0.00520341	-0.00803501	-0.00661921	-0.901457		-0.0361119

## Sheet: Repair kinetics repeat 3
ADE+	Raw Measurements (Image J)					Inverse band intensity
	Control	Unrepaired	Repair 1	Repair 2		Control	Unrepaired	Repair 1	Repair 2				Unrepaired	Repair 1	Repair 2	Avg repair	Avg repair/cntrl		Final repair fraction
ADE+	166.207	188.087	138.94	179.257		0.00601659	0.00531669	0.00719735	0.00557858				0.0283138	0.340893	0.092043	0.216468	35.9785		0.913634
	148.6	193.873	119.027	177.167		0.00672948	0.00515802	0.00840146	0.00564439				0.00173561	0.483711	0.0920718	0.287891	42.7806		1.08637
WT- Intra
	Control	Unrepaired	Repair 1	Repair 2		Control	Unrepaired	Repair 1	Repair 2				Unrepaired	Repair 1	Repair 2	Avg repair	Avg repair/cntrl		Final repair fraction
0	180.45	143.553	194.313	199.013		0.0055417	0.00696607	0.00514634	0.0050248				0.328371	0	0	0	0		0
2	148.463	136.36	192.56	196.267		0.00673568	0.00733353	0.00519319	0.0050951				0.324717	0.00695556	0.0104373	0.00869645	1.2911		0.0327861
3	146.067	155.177	186.53	193.947		0.00684617	0.00644425	0.00536107	0.00515605				0.189583	0.0313652	0.0191714	0.0252683	3.69086		0.0937254
4	143.24	166.6	172.17	189.72		0.00698129	0.0060024	0.00580821	0.00527093				0.122623	0.0948072	0.0352554	0.0650313	9.31509		0.236546
6	153.023	181.547	160.443	184.633		0.00653497	0.00550822	0.00623274	0.00541615				0.0553759	0.166245	0.0598859	0.113066	17.3016		0.439356
8	150.747	182.79	141.19	178.51		0.00663363	0.00547076	0.00708265	0.00560193				0.0489058	0.291894	0.0870006	0.189447	28.5586		0.725214
WT- Inter
	Control	Unrepaired	Repair 1	Repair 2		Control	Unrepaired	Repair 1	Repair 2				Unrepaired	Repair 1	Repair 2	Avg repair	Avg repair/cntrl		Final repair fraction
0	171.397	112.343	187.08	192.16		0.00583441	0.00890131	0.00534531	0.005204				0.643591	0	0	0	0		0
2	138.303	139.827	187.52	191.573		0.0072305	0.00715169	0.00533276	0.00521994				0.277347	-0.00173464	0.00220532	0.000235342	0.0325485		0.000826533
3	161.113	154.737	187.253	192.013		0.00620682	0.00646258	0.00534037	0.00520798				0.212064	-0.000795647	0.000641881	-7.68833e-05	-0.0123869		-0.000314551
4	152.09	175.247	176.703	189.003		0.00657505	0.00570623	0.00565921	0.00529092				0.0851545	0.0477421	0.0132204	0.0304812	4.63589		0.117723
6	174.42	185.957	155.603	181.093		0.00573329	0.00537759	0.00642661	0.00552202				0.0403348	0.188601	0.0554704	0.122036	21.2855		0.540521
8	161.33	186.687	138.26	172.05		0.00619848	0.00535656	0.00723275	0.00581226				0.0339153	0.304501	0.0981317	0.201316	32.4784		0.824752
exo1 sgs1- Intra
	Control	Unrepaired	Repair 1	Repair 2		Control	Unrepaired	Repair 1	Repair 2				Unrepaired	Repair 1	Repair 2	Avg repair	Avg repair/cntrl		Final repair fraction
0	150.563	111.193	194	198		0.00664174	0.00899337	0.00515464	0.00505051				0.579221	0	0	0	0		0
2	141.143	123.517	192.597	196.827		0.00708501	0.00809605	0.00519219	0.0050806				0.416332	0.00529988	0.00424822	0.00477405	0.673824		0.017111
3	136.707	153.64	185.43	194.96		0.00731491	0.00650872	0.00539287	0.00512926				0.186248	0.0325679	0.010766	0.0216669	2.96202		0.0752172
4	137.35	170.14	169.607	188.813		0.00728067	0.00587751	0.00589598	0.00529625				0.100427	0.101824	0.0337524	0.067788	9.31068		0.236434
6	138.443	182.99	143.553	179.8		0.00722319	0.00546478	0.00696607	0.00556174				0.0440863	0.25078	0.0707762	0.160778	22.2586		0.565232
8	145.043	184.747	133.01	177.96		0.00689451	0.00541281	0.00751823	0.00561924				0.0386499	0.342823	0.0824911	0.212657	30.8444		0.783258
exo1 sgs1- Inter
	Control	Unrepaired	Repair 1	Repair 2		Control	Unrepaired	Repair 1	Repair 2				Unrepaired	Repair 1	Repair 2	Avg repair	Avg repair/cntrl		Final repair fraction
0	163.837	99.447	192	196		0.00610363	0.0100556	0.00520833	0.00510204				0.80432	0	0	0	0		0
2	147.16	118.797	192.86	196.027		0.00679532	0.00841772	0.00518511	0.00510134				0.481417	-0.00341779	-0.000103415	-0.0017606	-0.25909		-0.0065793
3	135.127	138.84	193.2	197.227		0.00740045	0.00720254	0.00517598	0.0050703				0.277848	-0.00437134	-0.00428908	-0.00433021	-0.585129		-0.0148587
4	134.613	159.227	194.32	197.947		0.0074287	0.00628034	0.00514615	0.00505186				0.152652	-0.00837059	-0.00675535	-0.00756297	-1.01807		-0.0258529
6	109.37	168.393	195.617	198.333		0.00914328	0.00593849	0.00511203	0.00504203				0.0866378	-0.0105327	-0.0065639	-0.00854829	-0.934926		-0.0237414
8	112.687	173.187	197.46	200		0.00887414	0.00577411	0.00506432	0.005				0.0707414	-0.0162288	-0.0114987	-0.0138637	-1.56226		-0.0396719
