# Supplementary material for: Long-range DNA end resection supports homologous recombination by checkpoint activation rather than extensive homology generation
Source: eLife journal article supplement (doi:10.7554/elife.84322), 2023-06-30
Supplement: supp [file Figure 3- source data.xlsx]

## Sheet: Intrachromosomal
Genotype	Culture	Plate	CFU (YPAD)	% white	Average CFU (YPAD)	CFU (YPA + Gal)	% red	Average CFU (YPA + Gal)	Adjusted CFU (YPA + Gal)	Survival frequency	Average survival frequency	ST DEV
Intra WT	1	1	188	0.531915	177.5	195	8.20513	215	215	1.21127	1.0714	0.127683
		2	167	0.598802		235	6.38298									CFU YPA + Gal
	2	1	226	1.76991	215	169	8.28402	203.5	203.5	0.946512							1	2	3	4	5	6	7
		2	204	1.47059		238	4.20168									WT	215	203.5	184	203.5
	3	1	200	0	187.5	176	3.40909	184	184	0.981333						exo1 sgs1	108	80	88.5	162	363	381	316
		2	175	0.571429		192	4.16667									sml1	264.5	338	304.5	356
	4	1	189	1.0582	177.5	190	1.57895	203.5	203.5	1.14648						mec1 sml1	244.5	251.5	195	287.5
		2	166	0		217	2.76498									rad53 sml1	268	239.5	187	212
																rad9	266.5	265.5	199
																rad24	55	102	81.5	100
Genotype	Culture	Plate	CFU (YPAD)	% white	Average CFU (YPAD)	CFU (YPA + Gal)	% red	Average CFU (YPA + Gal)	Adjusted CFU (YPA + Gal)	Survival frequency	Average survival frequency	ST DEV
Intra exo1 sgs1	1	1	124	1.6129	134.5	95	0	108	108	0.802974	0.895772	0.101762
		2	145	0.689655		121	3.30579									Trp+ on YPA + Gal											Trp+ survival frequency
	2	1	103	0.970874	95	77	0	80	80	0.842105							1	2	3	4	5	6	7					1	2	3	4	5	6	7
		2	87	0		83	1.20482									WT	201.5	191.5	176	194.5							WT	1.13521	0.890698	0.938667	1.09577
	3	1	96	4.16667	92.5	96	1.04167	88.5	88.5	0.956757						exo1 sgs1	97.5	76	84	148	301	325	287				exo1 sgs1	0.724907	0.8	0.908108	0.753181	0.903904	0.783133	0.759259
		2	89	1.1236		81	2.46914									sml1	210	278.5	234	262							sml1	0.84507	0.84139	0.687225	0.731844
	4	1	206	0.970874	196.5	169	1.77515	162	162	0.824427						mec1 sml1	198.5	198	153.5	229.5							mec1 sml1	0.878319	0.878049	0.852778	0.741519
		2	187	0.534759		155	0.645161									rad53 sml1	226.5	212	167.5	187							rad53 sml1	0.82967	0.879668	0.78271	0.697761
	5	1	342	0.292398	333	374	1.06952	363	363	1.09009						rad9	223.5	224.5	177								rad9	0.716346	0.80322	0.986072	0
		2	324	1.23457		352	1.42045									rad24	40.5	71.5	64	79.5							rad24	0.669421	0.677725	0.61244	0.77561
	6	1	372	1.88172	415	390	0.25641	381	381	0.918072
		2	458	1.0917		372	1.07527
	7	1	372	1.07527	378	300	1.33333	316	316	0.835979						Fraction Trp+ on YPA + Gal											Trp- survival frequency
		2	384	0.78125		332	0.903614										1	2	3	4	5	6	7	Average				1	2	3	4	5	6	7
																WT	0.937209	0.941032	0.956522	0.955774				0.947634			WT	0.0760563	0.055814	0.0426667	0.0507042
																exo1 sgs1	0.902778	0.95	0.949153	0.91358	0.829201	0.853018	0.908228	0.900851			exo1 sgs1	0.0780669	0.0421053	0.0486486	0.0712468	0.186186	0.13494	0.0767196
																sml1	0.793951	0.823964	0.768473	0.735955				0.780586			sml1	0.219316	0.179758	0.207048	0.26257
Genotype	Culture	Plate	CFU (YPAD)	% white	Average CFU (YPAD)	CFU (YPA + Gal)	% red	Average CFU (YPA + Gal)	Adjusted CFU (YPA + Gal)	Survival frequency	Average survival frequency	ST DEV				mec1 sml1	0.811861	0.787276	0.787179	0.798261				0.796144			mec1 sml1	0.20354	0.237251	0.230556	0.187399
Intra sml1	1	1	244	2.04918	248.5	276	5.43478	264.5	264.5	1.06439	0.993555	0.0721944				rad53 sml1	0.845149	0.885177	0.895722	0.882075				0.877031			rad53 sml1	0.152015	0.114108	0.0911215	0.0932836
		2	253	0		253	5.5336									rad9	0.838649	0.845574	0.889447					0.85789			rad9	0.137821	0.146691	0.122563
	2	1	307	3.90879	331	317	6.30915	338	338	1.02115						rad24	0.736364	0.70098	0.785276	0.795				0.754405			rad24	0.239669	0.2891	0.167464	0.2
		2	355	2.8169		359	4.17827
	3	1	374	0.802139	340.5	304	8.55263	304.5	304.5	0.894273
		2	307	1.62866		305	9.83607
	4	1	393	1.01781	358	350	5.14286	356	356	0.994413
		2	323	0		362	8.56354
Genotype	Culture	Plate	CFU (YPAD)	% white	Average CFU (YPAD)	CFU (YPA + Gal)	% red	Average CFU (YPA + Gal)	Adjusted CFU (YPA + Gal)	Survival frequency	Average survival frequency	ST DEV
Intra mec1 sml1	1	1	229	0	226	227	13.6564	244.5	244.5	1.08186	1.05235	0.0837235
		2	223	0.896861		262	10.687
	2	1	242	0	225.5	282	8.86525	251.5	251.5	1.1153
		2	209	0.956938		221	7.23982
	3	1	166	3.01205	180	218	13.3028	195	195	1.08333
		2	194	2.06186		172	9.88372
	4	1	320	0.3125	309.5	271	11.4391	287.5	287.5	0.928918
		2	299	1.00334		304	7.56579
Genotype	Culture	Plate	CFU (YPAD)	% white	Average CFU (YPAD)	CFU (YPA + Gal)	% red	Average CFU (YPA + Gal)	Adjusted CFU (YPA + Gal)	Survival frequency	Average survival frequency	ST DEV
Intra rad53 sml1	1	1	258	0.387597	273	264	15.5303	268	268	0.981685	0.910084	0.0959437
		2	288	0.694444		272	10.6618
	2	1	233	0	241	243	11.5226	239.5	239.5	0.993776
		2	249	0.401606		236	7.62712
	3	1	215	3.72093	214	199	12.0603	187	187	0.873832
		2	213	0		175	20
	4	1	269	0.743494	268	215	6.97674	212	212	0.791045
		2	267	0.374532		209	7.17703
Genotype	Culture	Plate	CFU (YPAD)	% white	Average CFU (YPAD)	CFU (YPA + Gal)	% red	Average CFU (YPA + Gal)	Adjusted CFU (YPA + Gal)	Survival frequency	Average survival frequency	ST DEV
Intra rad9	1	1	333	1.5015	312	293	25.256	266.5	266.5	0.854167	0.970904	0.128527
		2	291	1.03093		240	21.6667
	2	1	290	3.10345	279.5	240	17.5	265.5	265.5	0.949911
		2	269	3.71747		291	19.244
	3	1	165	4.84848	179.5	201	20.398	199	199	1.10864
		2	194	1.03093		197	19.2893
Genotype	Culture	Plate	CFU (YPAD)	% white	Average CFU (YPAD)	CFU (YPA + Gal)	% red	Average CFU (YPA + Gal)	Adjusted CFU (YPA + Gal)	Survival frequency	Average survival frequency	ST DEV
Intra rad24	1	1	69	0	60.5	54	18.5185	55	55	0.909091	0.907857	0.0902608
		2	52	0		56	8.92857
	2	1	113	0	105.5	94	3.19149	102	102	0.966825
		2	98	2.04082		110	12.7273
	3	1	115	0	104.5	77	6.49351	81.5	81.5	0.779904
		2	94	0		86	13.9535
	4	1	104	0.961538	102.5	90	7.77778	100	100	0.97561
		2	101	2.9703		110	12.7273
Genotypes compared	p-value	Indicator
WT-sml1∆	0.339566	ns
WT-exo1∆ sgs1∆	0.0628058	ns
WT-mec1∆ sml1∆	0.812589	ns
WT-rad53∆ sml1∆	0.0935634	ns
WT-rad9∆	0.357285	ns
WT-rad24∆	0.0865689	ns

## Sheet: Interchromosomal
Genotype	Culture	Plate	CFU (YPAD)	% white	Average CFU (YPAD)	CFU (YPA + Gal)	% red	Average CFU (YPA + Gal)	Adjusted CFU (YPA + Gal)	Survival frequency	Average survival frequency	ST DEV
Inter WT	1	1	369	1.08401	376	310	5.80645	327.5	327.5	0.871011	0.905719	0.0786746
		2	383	2.87206		345	5.7971
	2	1	138	3.62319	144.5	120	4.16667	131	131	0.906574
		2	151	1.98675		142	3.52113
	3	1	197	1.01523	186	157	1.91083	173.5	173.5	0.932796
		2	175	6.28571		190	4.73684
	4	1	141	4.25532	129.5	97	2.06186	102.5	102.5	0.791506
		2	118	5.08475		108	4.62963
	5	1	322	1.5528	321.5	312	2.5641	289.5	289.5	0.900467
		2	321	1.86916		267	3.37079
	6	1	238	0.840336	219	222	3.6036	226	226	1.03196
		2	200	2.5		230	3.47826
Genotype	Culture	Plate	CFU (YPAD)	% white	Average CFU (YPAD)	CFU (YPA + Gal)	% red	Average CFU (YPA + Gal)	Adjusted CFU (YPA + Gal)	Survival frequency	Average survival frequency	ST DEV
Inter exo1 sgs1	1	1	137	0	116	107	0	95	9.5	0.0818966	0.0777871	0.025245
		2	95	0		83	0
	2	1	566	0	572.5	304	7.56579	334.5	33.45	0.0584279
		2	579	0		365	4.93151
	3	1	484	0	479.5	369	2.16802	414	41.4	0.0863399
		2	475	0		459	2.83224
	4	1	134	2.23881	131	52	0	65	6.5	0.0496183
		2	128	1.5625		78	3.84615
	5	1	160	2.5	169.5	79	3.79747	91	9.1	0.0536873
		2	179	2.7933		103	7.76699
	6	1	102	0	104.5	82	1.21951	100.5	10.05	0.0961722
		2	107	0		119	0.840336
	7	1	40	17.5	49	61	0	58	5.8	0.118367
		2	58	3.44828		55	1.81818
Genotype	Culture	Plate	CFU (YPAD)	% white	Average CFU (YPAD)	CFU (YPA + Gal)	% red	Average CFU (YPA + Gal)	Adjusted CFU (YPA + Gal)	Survival frequency	Average survival frequency	ST DEV
Inter sml1	1	1	208	1.92308	204.5	140	6.42857	149	149	0.728606	0.870074	0.0981348
		2	201	1.99005		158	11.3924
	2	1	287	1.39373	271.5	250	7.2	244.5	244.5	0.900552
		2	256	3.51562		239	7.53138
	3	1	215	1.86047	230	196	13.2653	206	206	0.895652
		2	245	3.67347		216	10.1852
	4	1	305	1.96721	314.5	287	7.31707	300.5	300.5	0.955485
		2	324	1.23457		314	7.96178
Genotype	Culture	Plate	CFU (YPAD)	% white	Average CFU (YPAD)	CFU (YPA + Gal)	% red	Average CFU (YPA + Gal)	Adjusted CFU (YPA + Gal)	Survival frequency	Average survival frequency	ST DEV
Inter mec1 sml1	1	1	157	3.18471	126.5	65	4.61538	48.5	48.5	0.383399	0.390958	0.0286818
		2	96	3.125		32	3.125
	2	1	118	3.38983	114.5	82	3.65854	84	42	0.366812
		2	111	5.40541		86	5.81395
	3	1	131	3.05344	139	120	5	117.5	58.75	0.422662
		2	147	2.72109		115	6.95652
Genotype	Culture	Plate	CFU (YPAD)	% white	Average CFU (YPAD)	CFU (YPA + Gal)	% red	Average CFU (YPA + Gal)	Adjusted CFU (YPA + Gal)	Survival frequency	Average survival frequency	ST DEV
Inter rad53 sml1	1	1	126	0	127.5	64	9.375	79	39.5	0.309804	0.379426	0.0517743
		2	129	0		94	6.38298
	2	1	104	0.961538	103	78	8.97436	76.5	38.25	0.371359
		2	102	0		75	8
	3	1	94	1.06383	101	83	3.61446	86	43	0.425743
		2	108	0.925926		89	4.49438
	4	1	107	2.80374	106.5	89	0	87.5	43.75	0.410798
		2	106	8.49057		86	1.16279
Genotype	Culture	Plate	CFU (YPAD)	% white	Average CFU (YPAD)	CFU (YPA + Gal)	% red	Average CFU (YPA + Gal)	Adjusted CFU (YPA + Gal)	Survival frequency	Average survival frequency	ST DEV
Inter rad9	1	1	395	0	381.5	98	6.12245	112	112	0.293578	0.251624	0.0531934
		2	368	0		126	4.7619
	2	1	210	0.47619	219	47	14.8936	46	46	0.210046
		2	228	0		45	13.3333
	3	1	113	0.884956	104.5	36	8.33333	31.5	31.5	0.301435
		2	96	1.04167		27	14.8148
	4	1	66	4.54545	69.5	11	0	14	14	0.201439
		2	73	12.3288		17	5.88235
Genotype	Culture	Plate	CFU (YPAD)	% white	Average CFU (YPAD)	CFU (YPA + Gal)	% red	Average CFU (YPA + Gal)	Adjusted CFU (YPA + Gal)	Survival frequency	Average survival frequency	ST DEV
Inter rad24	1	1	153	3.26797	167.5	74	5.40541	66.5	66.5	0.397015	0.399185	0.0721382
		2	182	0.549451		59	0
	2	1	138	2.89855	118	56	1.78571	52.5	52.5	0.444915
		2	98	4.08163		49	8.16327
	3	1	84	2.38095	80.5	28	7.14286	24	24	0.298137
		2	77	5.19481		20	5
	4	1	218	3.21101	213.5	102	3.92157	97.5	97.5	0.456674
		2	209	1.91388		93	6.45161
Genotype	Culture	Plate	CFU (YPAD)	% white	Average CFU (YPAD)	CFU (YPA + Gal)	% red	Average CFU (YPA + Gal)	Adjusted CFU (YPA + Gal)	Survival frequency	Average survival frequency	ST DEV
Inter rad9 exo1 sgs1	1	1	400	0.75	399	310	1.29032	290	29	0.0726817	0.105446	0.048014
		2	398	0		270	1.48148
	2	1	305	0	297.5	210	0.47619	199	19.9	0.0668908
		2	290	0		188	0.531915
	3	1	99	8.08081	100	122	4.91803	111	11.1	0.111
		2	101	7.92079		100	5
	4	1	33	3.0303	33	49	0	56.5	5.65	0.171212
		2	33	6.06061		64	3.125
Genotype	Culture	Plate	CFU (YPAD)	% white	Average CFU (YPAD)	CFU (YPA + Gal)	% red	Average CFU (YPA + Gal)	Adjusted CFU (YPA + Gal)	Survival frequency	Average survival frequency	ST DEV
Inter rad24 exo1 sgs1	1	1	98	2.04082	95.5	29	0	27	27	0.282723	0.299093	0.0303245
		2	93	0		25	0
	2	1	70	4.28571	71.5	27	0	24	24	0.335664
		2	73	0		21	0
	3	1	199	0.502513	199.5	64	4.6875	62	62	0.310777
		2	200	1		60	10
	4	1	133	3.7594	123.5	35	11.4286	33	33	0.267206
		2	114	3.50877		31	3.22581
Genotypes compared	p-value	Indicator
WT-sml1∆	0.567476	ns
WT-exo1∆ sgs1∆	3.60863e-07	****
WT-mec1∆ sml1∆	2.55471e-06	****
WT-rad53∆ sml1∆	1.36065e-06	****
WT-rad9∆	2.8488e-07	****
WT-rad24∆	1.55789e-05	****
exo1∆ sgs1∆-sml1∆	0.000358195	***
exo1∆ sgs1∆-mec1∆ sml1∆	0.00022563	***
exo1∆ sgs1∆-rad53∆ sml1∆	0.00049655	***
exo1∆ sgs1∆-rad9∆	0.00421783	**
exo1∆ sgs1∆-rad24∆	0.00193988	**
rad9∆-rad9∆ exo1∆ sgs1∆	0.00664708	**
exo1∆ sgs1∆-rad9∆ exo1∆ sgs1∆	0.345005	ns
rad24∆-rad24∆ exo1∆ sgs1∆	0.0623331	ns
exo1∆ sgs1∆-rad24∆ exo1∆ sgs1∆	3.55045e-05	****
