# Supplementary material for: Long-range DNA end resection supports homologous recombination by checkpoint activation rather than extensive homology generation
Source: eLife journal article supplement (doi:10.7554/elife.84322), 2023-06-30
Supplement: supp [file Figure 4A- source data.xlsx]

## Sheet: Inter DDC2-RAD53
Genotype	Culture	Plate	CFU (YPAD)	% white	Average CFU (YPAD)	CFU (YPA + Gal)	% red	Average CFU (YPA + Gal)	Adjusted CFU (YPA + Gal)	Survival frequency	Average survival frequency	ST DEV
Inter WT	1	1	369	1.08401	376	310	5.80645	327.5	327.5	0.871011	0.905719	0.0786746
		2	383	2.87206		345	5.7971
	2	1	138	3.62319	144.5	120	4.16667	131	131	0.906574
		2	151	1.98675		142	3.52113
	3	1	197	1.01523	186	157	1.91083	173.5	173.5	0.932796
		2	175	6.28571		190	4.73684
	4	1	141	4.25532	129.5	97	2.06186	102.5	102.5	0.791506
		2	118	5.08475		108	4.62963
	5	1	322	1.5528	321.5	312	2.5641	289.5	289.5	0.900467
		2	321	1.86916		267	3.37079
	6	1	238	0.840336	219	222	3.6036	226	226	1.03196
		2	200	2.5		230	3.47826
Genotype	Culture	Plate	CFU (YPAD)	% white	Average CFU (YPAD)	CFU (YPA + Gal)	% red	Average CFU (YPA + Gal)	Adjusted CFU (YPA + Gal)	Survival frequency	Average survival frequency	ST DEV
Inter rad9	1	1	395	0	381.5	98	6.12245	112	112	0.293578	0.251624	0.0531934
		2	368	0		126	4.7619
	2	1	210	0.47619	219	47	14.8936	46	46	0.210046
		2	228	0		45	13.3333
	3	1	113	0.884956	104.5	36	8.33333	31.5	31.5	0.301435
		2	96	1.04167		27	14.8148
	4	1	66	4.54545	69.5	11	0	14	14	0.201439
		2	73	12.3288		17	5.88235
Genotype	Culture	Plate	CFU (YPAD)	% white	Average CFU (YPAD)	CFU (YPA + Gal)	% red	Average CFU (YPA + Gal)	Adjusted CFU (YPA + Gal)	Survival frequency	Average survival frequency	ST DEV
Inter DDC2-RAD53	1	1	422	0.236967	423	378	3.7037	367	367	0.867612	0.881144	0.174478
		2	424	2.35849		356	5.33708
	2	1	359	1.67131	364	343	2.62391	335.5	335.5	0.921703
		2	369	0.813008		328	4.26829
	3	1	133	0.75188	127	134	2.98507	137	137	1.07874
		2	121	0.826446		140	2.85714
	4	1	114	0	115	67	4.47761	75.5	75.5	0.656522
		2	116	0		84	3.57143
Genotype	Culture	Plate	CFU (YPAD)	% white	Average CFU (YPAD)	CFU (YPA + Gal)	% red	Average CFU (YPA + Gal)	Adjusted CFU (YPA + Gal)	Survival frequency	Average survival frequency	ST DEV
Inter rad9 DDC2-RAD53	1	1	338	0.295858	371.5	276	3.98551	256	256	0.689098	0.728473	0.0806073
		2	405	0.740741		236	14.4068
	2	1	256	0.78125	251	213	11.7371	213	213	0.848606
		2	246	0.813008			#DIV/0!
	3	1	173	0	162.5	105	7.61905	110	110	0.676923
		2	152	0		115	5.21739
	4	1	206	0.970874	204.5	148	10.8108	143	143	0.699267
		2	203	0		138	8.69565
Genotypes compared	p-value	Indicator
WT-rad9∆	2.8488e-07	****
WT-DDC2-RAD53	0.805134	ns
WT-rad9∆ DDC2-RAD53	0.0123041	*
rad9∆-DDC2-RAD53	0.00353253	**
rad9∆-rad9∆ DDC2-RAD53	0.00014601	***
DDC2-RAD53-rad9∆ DDC2-RAD53	0.183555	ns
