# Supplementary material for: Long-range DNA end resection supports homologous recombination by checkpoint activation rather than extensive homology generation
Source: eLife journal article supplement (doi:10.7554/elife.84322), 2023-06-30
Supplement: supp [file Figure 5A- source data.xlsx]

## Sheet: Figure 5
Genotype	Culture	Plate	CFU (YPAD)	% white	Average CFU (YPAD)	CFU (YPA + Gal)	% red	Average CFU (YPA + Gal)	Adjusted CFU (YPA + Gal)	Survival frequency	Average survival frequency	ST DEV
WT 4 kb donor	1	1	188	0.531915	177.5	195	8.20513	215	215	1.21127	1.0714	0.127683
		2	167	0.598802		235	6.38298
	2	1	226	1.76991	215	169	8.28402	203.5	203.5	0.946512
		2	204	1.47059		238	4.20168
	3	1	200	0	187.5	176	3.40909	184	184	0.981333
		2	175	0.571429		192	4.16667
	4	1	189	1.0582	177.5	190	1.57895	203.5	203.5	1.14648
		2	166	0		217	2.76498
Genotype	Culture	Plate	CFU (YPAD)	% white	Average CFU (YPAD)	CFU (YPA + Gal)	% red	Average CFU (YPA + Gal)	Adjusted CFU (YPA + Gal)	Survival frequency	Average survival frequency	ST DEV
exo1 sgs1 4 kb donor	1	1	457	0.437637	491.5	434	0.691244	443.5	443.5	0.90234	0.916688	0.0932045
		2	526	0.760456		453	0.441501
	2	1	397	0	379	405	0.987654	383	383	1.01055
		2	361	0.277008		361	0.554017
	3	1	264	0.378788	254	208	0	223	223	0.877953
		2	244	0.409836		238	0.420168
	4	1	110	3.63636	112	122	0	114.5	114.5	1.02232
		2	114	3.47826		107	0
	5	1	124	1.6129	134.5	95	0	108	108	0.802974
		2	145	0.689655		121	3.30579
	6	1	103	0.970874	95	77	0	80	80	0.842105
		2	87	0		83	1.20482
	7	1	96	4.16667	92.5	96	1.04167	88.5	88.5	0.956757
		2	89	1.1236		81	2.46914
	8	1	206	0.970874	196.5	169	1.77515	162	162	0.824427
		2	187	0.534759		155	0.645161
	9	1	342	0.292398	333	374	1.06952	363	363	1.09009
		2	324	1.23457		352	1.42045
	10	1	372	1.88172	415	390	0.25641	381	381	0.918072
		2	458	1.0917		372	1.07527
	11	1	372	1.07527	378	300	1.33333	316	316	0.835979
		2	384	0.78125		332	0.903614
Genotype	Culture	Plate	CFU (YPAD)	% white	Average CFU (YPAD)	CFU (YPA + Gal)	% red	Average CFU (YPA + Gal)	Adjusted CFU (YPA + Gal)	Survival frequency	Average survival frequency	ST DEV
WT 19 kb donor	1	1	475	0.421053	500	496	10.8871	478	478	0.956	1.05226	0.0964293
		2	525	0.186916		460	10.6522
	2	1	440	0.681818	425	472	10.5932	495.5	495.5	1.16588
		2	410	0.243902		519	8.67052
	3	1	561	0.891266	544	580	9.13793	539	539	0.990809
		2	527	0.948767		498	9.83936
	4	1	316	0	301	335	12.5373	330	330	1.09635
		2	286	1.04895		325	12
Genotype	Culture	Plate	CFU (YPAD)	% white	Average CFU (YPAD)	CFU (YPA + Gal)	% red	Average CFU (YPA + Gal)	Adjusted CFU (YPA + Gal)	Survival frequency	Average survival frequency	ST DEV
exo1 sgs1 19 kb donor	1	1	114	0	111.5	122	0	116	116	1.04036	1.05891	0.0331139
		2	109	0		110	0
	2	1	133	23.3083	138.5	158	0.632911	147.5	147.5	1.06498
		2	144	20.8333		137	0
	3	1	101	0.990099	109	98	2.04082	112	112	1.02752
		2	117	0		126	0.793651
	4	1	118	0	126.5	112	1.78571	139.5	139.5	1.10277
		2	135	0		167	1.1976
Genotype	Culture	Plate	CFU (YPAD)	% white	Average CFU (YPAD)	CFU (YPA + Gal)	% red	Average CFU (YPA + Gal)	Adjusted CFU (YPA + Gal)	Survival frequency	Average survival frequency	ST DEV
WT 54 kb donor	1	1	434	0.921659	416	421	9.73872	395	395	0.949519	0.981966	0.0397807
		2	398	1.25628		369	8.67209
	2	1	373	0	348	332	11.747	343	343	0.985632
		2	323	0.928793		354	9.03955
	3	1	508	0.393701	522	518	8.88031	499	499	0.955939
		2	536	0.746269		480	10.8333
	4	1	450	1.33333	421.5	442	11.7647	437	437	1.03677
		2	393	0.508906		432	9.72222
Genotype	Culture	Plate	CFU (YPAD)	% white	Average CFU (YPAD)	CFU (YPA + Gal)	% red	Average CFU (YPA + Gal)	Adjusted CFU (YPA + Gal)	Survival frequency	Average survival frequency	ST DEV	* plated 2x cells on YPA + Gal relative to YPAD
exo1 sgs1 54 kb donor	1	1	240	0	223	273	2.9304	275	137.5	0.616592	0.68024	0.0934536
		2	206	0		277	3.61011
	2	1	296	0	298	347	4.89914	351.5	175.75	0.589765
		2	300	0		356	3.65169
	3	1	297	0.3367	303	467	4.06852	478.5	239.25	0.789604
		2	309	0		490	2.85714
	4	1	148	0	160	236	3.81356	232	116	0.725
		2	172	0		228	4.38596
Genotype	Culture	Plate	CFU (YPAD)	% white	Average CFU (YPAD)	CFU (YPA + Gal)	% red	Average CFU (YPA + Gal)	Adjusted CFU (YPA + Gal)	Survival frequency	Average survival frequency	ST DEV
WT 100 kb donor	1	1	121	2.47934	125	116	6.03448	126.5	126.5	1.012	1.07434	0.127839
		2	129	3.87597		137	4.37956
	2	1	204	0.490196	199.5	239	3.34728	256	256	1.28321
		2	195	0		273	3.663
	3	1	229	0.436681	243.5	253	4.34783	243	243	0.997947
		2	258	0		233	4.29185
	4	1	268	0	284.5	276	10.1449	276	276	0.970123
		2	301	0.332226		276	5.7971
	5	1	211	0.473934	207.5	214	7.47664	230	230	1.10843
		2	204	0.980392		246	10.9756
Genotype	Culture	Plate	CFU (YPAD)	% white	Average CFU (YPAD)	CFU (YPA + Gal)	% red	Average CFU (YPA + Gal)	Adjusted CFU (YPA + Gal)	Survival frequency	Average survival frequency	ST DEV	* plated 2.5x cells on YPA + Gal relative to YPAD
exo1 sgs1 100 kb donor	1	1	276	0.362319	274.5	191	4.71204	203	81.2	0.295811	0.352492	0.0461472
		2	273	0.3663		215	2.32558
	2	1	110	0	117	116	5.17241	113	45.2	0.386325
		2	124	0		110	0
	3	1	234	0	240	176	5.11364	200.5	80.2	0.334167
		2	246	0		225	5.33333
	4	1	182	0	189.5	183	4.91803	186.5	74.6	0.393668
		2	197	0		190	6.31579
Genotype	Culture	Plate	CFU (YPAD)	% white	Average CFU (YPAD)	CFU (YPA + Gal)	% red	Average CFU (YPA + Gal)	Adjusted CFU (YPA + Gal)	Survival frequency	Average survival frequency	ST DEV
WT 250 kb donor	1	1	200	0	175	221	4.0724	209.5	209.5	1.19714	1.0772	0.138242
		2	150	0		198	6.56566
	2	1	126	2.38095	124.5	150	6.66667	152.5	152.5	1.2249
		2	123	1.62602		155	4.51613
	3	1	142	1.40845	131.5	112	2.67857	118	118	0.897338
		2	121	0.826446		124	5.64516
	4	1	259	0.772201	262	273	6.59341	282.5	282.5	1.07824
		2	265	0.377358		292	7.53425
	5	1	253	0	258	266	4.51128	255	255	0.988372
		2	263	0.760456		244	4.91803
Genotype	Culture	Plate	CFU (YPAD)	% white	Average CFU (YPAD)	CFU (YPA + Gal)	% red	Average CFU (YPA + Gal)	Adjusted CFU (YPA + Gal)	Survival frequency	Average survival frequency	ST DEV	* plated 2.5x cells on YPA + Gal relative to YPAD
exo1 sgs1 250 kb donor	1	1	230	0	228	106	1.88679	99.5	39.8	0.174561	0.238348	0.0652723
		2	226	0		93	4.30108
	2	1	236	0	210.5	124	4.03226	125	50	0.23753
		2	185	0		126	2.38095
	3	1	168	0	168	89	11.236	89.5	35.8	0.213095
		2	168	0		90	15.5556
	4	1	131	0	136.5	109	11.0092	112	44.8	0.328205
		2	142	0		115	17.3913
Genotype	Culture	Plate	CFU (YPAD)	% white	Average CFU (YPAD)	CFU (YPA + Gal)	% red	Average CFU (YPA + Gal)	Adjusted CFU (YPA + Gal)	Survival frequency	Average survival frequency	ST DEV
WT 448 kb donor	1	1	197	0	191.5	220	5.45455	209	209	1.09138	1.03984	0.0627041
		2	186	0.537634		198	6.56566
	2	1	120	0	111.5	127	3.14961	123.5	123.5	1.10762
		2	103	0		120	5.83333
	3	1	162	0	171	168	4.16667	179	179	1.04678
		2	180	0.555556		190	5.26316
	4	1	255	0	244	245	6.12245	242	242	0.991803
		2	233	0.858369		239	9.20502
	5	1	268	0.373134	273.5	254	8.66142	263	263	0.961609
		2	279	0.358423		272	14.3382
Genotype	Culture	Plate	CFU (YPAD)	% white	Average CFU (YPAD)	CFU (YPA + Gal)	% red	Average CFU (YPA + Gal)	Adjusted CFU (YPA + Gal)	Survival frequency	Average survival frequency	ST DEV	* plated 2.5x cells on YPA + Gal relative to YPAD (1-4), plated 5x cells on YPA + Gal realtive to YPAD (5-7)
exo1 sgs1 448 kb donor	1	1	171	0	175	77	5.19481	78	31.2	0.178286	0.28076	0.0906399
		2	179	0		79	3.79747
	2	1	158	0	174.5	74	6.75676	71	28.4	0.162751
		2	191	0		68	7.35294
	3	1	116	0	104.5	94	8.51064	87.5	35	0.334928
		2	93	0		81	8.64198
	4	1	98	0	101.5	68	8.82353	64.5	25.8	0.254187
		2	105	0		61	9.83607
	5	1	151	0	138	225	2.66667	232	46.4	0.336232
		2	125	0		239	2.92887
	6	1	161	0	166.5	231	4.7619	236	47.2	0.283483
		2	172	0		241	4.97925
	7	1	234	0	233	469	3.19829	484	96.8	0.415451
		2	232	0		499	4.20842
Genotype	Culture	Plate	CFU (YPAD)	% white	Average CFU (YPAD)	CFU (YPA + Gal)	% red	Average CFU (YPA + Gal)	Adjusted CFU (YPA + Gal)	Survival frequency	Average survival frequency	ST DEV
WT 478 kb donor	1	1	217	0.460829	226	213	9.38967	214	214	0.946903	1.01103	0.0989014
		2	235	0.851064		215	6.04651
	2	1	340	0.882353	326.5	346	5.49133	351.5	351.5	1.07657
		2	313	0.638978		357	6.16246
	3	1	270	0	293.5	252	7.53968	275	275	0.936968
		2	317	0		298	7.04698
	4	1	184	0.543478	185.5	214	6.07477	214	214	1.15364
		2	187	0.534759		214	7.00935
	5	1	230	0	254.5	258	3.48837	239.5	239.5	0.941061
		2	279	0		221	5.88235
Genotype	Culture	Plate	CFU (YPAD)	% white	Average CFU (YPAD)	CFU (YPA + Gal)	% red	Average CFU (YPA + Gal)	Adjusted CFU (YPA + Gal)	Survival frequency	Average survival frequency	ST DEV	* plated 2.5x cells on YPA + Gal relative to YPAD
exo1 sgs1 478 kb donor	1	1	191	0	192	110	1.81818	114.5	45.8	0.238542	0.27461	0.0266775
		2	193	0		119	0
	2	1	129	0	132	78	0	91	36.4	0.275758
		2	135	0		104	0.961538
	3	1	150	0.666667	152	115	0	115	46	0.302632
		2	154	0		115	0
	4	1	267	0	251.5	171	1.75439	177	70.8	0.281511
		2	236	0		183	3.27869
			TTEST		478 kb	4 kb	19 kb	54 kb	100 kb	250 kb	448 kb
				WT v exo1 sgs1	2.80929e-05	0.0871817	0.903019	0.00386114	6.01296e-05	2.22023e-05	9.61516e-09
			exo1 sgs1 site 1 v exo1 sgs1 site 2	478 kb		3.14321e-11	4.82218e-08	0.00200752	0.03455	0.362166	0.871523
				4 kb			0.000779392	0.00637636	6.77794e-09	3.38468e-07	1.94966e-09
				19 kb				0.00205659	8.15788e-07	9.54757e-06	2.38813e-08
				54 kb					0.00239276	0.000413189	0.000399723
				100 kb						0.0325938	0.116524
				250 kb							0.395471
