# Supplementary material for: Long-range DNA end resection supports homologous recombination by checkpoint activation rather than extensive homology generation
Source: eLife. 2023 Jun 30;12:e84322. doi: 10.7554/eLife.84322 (PMC10400078; doi:10.7554/eLife.84322)
Supplement: Supplementary file 1. — All yeast strains used in this study. [file elife-84322-supp1.xlsx]

## Sheet: Sheet1
Table S1	Yeast strains
*All strains listed are of W303 background (leu2-3,112 trp1-1 ura3-1 can1-100 his3-11,15). Any modifications are listed under genotype.
Strain	Genotype*	Source
LSY4105-16A	MAT⍺ ade2-n::TRP1::ade2-I lys2::GAL-I-SceI	Lab collection
LSY1709-8C	MATa ade2-n::TRP1::ade2-I lys2::GAL-I-SceI exo1::HIS3	Mimitou et al. 2008
LSY2010-10B	MATa ade2-n::TRP1::ade2-I lys2::GAL-I-SceI sgs1::HphMX	Mimitou et al. 2008
LSY1995-8C	MAT⍺ ade2-n::TRP1::ade2-I lys2::GAL-I-SceI sgs1::HphMX exo1::HIS3	Mimitou et al. 2008
LSY4466-14D	MATa ade2-n::TRP1::ade2-I lys2::GAL-I-SceI mre11::KlURA3	Lab collection
LSY4692-5C	MAT⍺ ade2-n::TRP1::ade2-I lys2::GAL-I-SceI rad9::HIS	This study
LSY4824-14B	MATa ade2-n::TRP1::ade2-I lys2::GAL-I-SceI sml1::HIS3 mec1::NatMX	This study
LSY4838-14B	MATa ade2-n::TRP1::ade2-I lys2::GAL-I-SceI rad24::NatMX	This study
LSY4841-27B	MATa ade2-n::TRP1::ade2-I lys2::GAL-I-SceI rad24::NatMX exo1::HIS3 sgs1::HphMX	This study
LSY5621-1C	MATa ade2-n::TRP1::ade2-I lys2::GAL-I-SceI sml1::URA3	This study
LSY5617-12C	MATa ade2-n::TRP1::ade2-I lys2::GAL-I-SceI sml1::URA3 rad53::HIS3	This study
LSY1709-9D	MATa ade2-n::TRP1::ade2-I lys2::GAL-ISceI rad51::LEU2	Mimitou et al. 2008
LSY1709-10C	MAT⍺ ade2-n::TRP1::ade2-I lys2::GAL-ISceI rad51::LEU2 exo1::HIS3	Mimitou et al. 2008
LSY1983-16B	MATa ade2-n::TRP1::ade2-I lys2::GAL-ISceI rad51::LEU2 sgs1::HphMX	Mimitou et al. 2008
LSY1983-32B	MAT⍺ ade2-n::TRP1::ade2-I lys2::GAL-ISceI rad51::LEU2 exo1::HIS3 sgs1::HphMX	Mimitou et al. 2008
LSY1924-35C	MATa ade2-n::TRP1::ade2-I lys2::GAL-ISceI rad51::LEU2 mre11::KlURA3	Mimitou et al. 2008
LSY4540-7B	MATa ade2::ade2-I leu2::ade2-n-LEU2MX lys2::GAL-ISceI	This study
LSY4610-3-10D	MATa ade2::ade2-I leu2::ade2-n-LEU2MX lys2::GAL-ISceI exo1::KanMX	This study
LSY4613-6-4A	MAT⍺ ade2::ade2-I leu2::ade2-n-LEU2MX lys2::GAL-ISceI sgs1::HphMX	This study
LSY4614-2-2D	MATa ade2::ade2-I leu2::ade2-n-LEU2MX lys2::GAL-ISceI exo1::KanMX sgs1::HphMX	This study
LSY4547-3	MATa ade2::ade2-I leu2::ade2-n-LEU2MX lys2::GAL-ISceI mre11::TRP1	This study
LSY4786-7B	MATa ade2::ade2-I leu2::ade2-n-LEU2MX lys2::GAL-ISceI rad9::HIS3	This study
LSY4816-4A	MATa ade2::ade2-I leu2::ade2-n-LEU2MX lys2::GAL-ISceI rad24::TRP1	This study
LSY4819-6A	MAT⍺ ade2::ade2-I leu2::ade2-n-LEU2MX lys2::GAL-ISceI rad24::TRP1 exo1::KanMX sgs1::HphMX	This study
LSY4941-21A	MATa ade2::ade2-I leu2::ade2-n-LEU2MX lys2::GAL-ISceI mec1::NatMX sml1::HIS3	This study
LSY5022-39A	MATa ade2::ade2-I leu2::ade2-n-LEU2MX lys2::GAL-ISceI rad9::HIS3 exo1::KanMX sgs1::HphMX	This study
LSY5620-7C	MAT⍺ ade2::ade2-I leu2::ade2-n-LEU2MX lys2::GAL-ISceI sml1::URA3	This study
LSY5552-87C	MATa ade2::ade2-I leu2::ade2-n-LEU2MX lys2::GAL-ISceI sml1::URA3 rad53::HIS3	This study
LSY5019-22C	MATa ade2::ade2-I leu2::ade2-n-LEU2MX lys2::GAL-ISceI rad53::DDC2-RAD53::URA3	This study
LSY5018-6B	MATa ade2::ade2-I leu2::ade2-n-LEU2MX lys2::GAL-ISceI rad53::DDC2-RAD53::URA3 rad9::HIS3	This study
LSY5097-41C	MATa ade2::ade2-I leu2::ade2-n-LEU2MX lys2::GAL-ISceI rad53::DDC2-RAD53::URA3 exo1::KanMX sgs1::HphMX	This study
LSY5093-22D	MATa ade2::ade2-I leu2::ade2-n-LEU2MX lys2::GAL-ISceI rad53::DDC2-RAD53::URA3 rad24::TRP1	This study
LSY5096-10B	MATa ade2::ade2-I leu2::ade2-n-LEU2MX lys2::GAL-ISceI rad53::DDC2-RAD53::URA3 exo1::KanMX sgs1::HphMX rad24::TRP1	This study
LSY1738-3B	MATa ade2::ade2-I lys2::GAL-ISceI	Lab collection
LSY5092-26A	MATa ade2::ade2-I lys2::GAL-ISceI exo1::KanMX sgs1::HphMX	This study
LSY2961-14B	MATa hmlD hmrD leu2::GAL-HO::LEU2 bar1::URA3 exo1::KanMX sgs1::HphMX rad9::HIS3	Lab collection
LSY4878-255A	MATa RAD5 hmlD hmrD leu2::P_lexO-HO-TCYC1-PACT1-LexA-ER-B112-TCYC1-LEU2MX	Lab collection
LSY4876-237A	MATa RAD5 hmlD hmrD leu2::P_lexO-HO-TCYC1-PACT1-LexA-ER-B112-TCYC1-LEU2MX exo1::KanMX sgs1::hphMX	Lab collection
LSY4962-2D	MATa RAD5 hmlD hmrD leu2::P_lexO-HO-TCYC1-PACT1-LexA-ER-B112-TCYC1-LEU2MX rad9::HIS3	This study
LSY5102	MATa RAD5 hmlD hmrD leu2::P_lexO-HO-TCYC1-PACT1-LexA-ER-B112-TCYC1-LEU2MX rad24::NatMX	This study
LSY5138	MATa RAD5 hmlD hmrD leu2::P_lexO-HO-TCYC1-PACT1-LexA-ER-B112-TCYC1-LEU2MX exo1::KanMX sgs1::hphMX rad24::NatMX	This study
LSY5624-8C	MATa RAD5 hmlD hmrD leu2::P_lexO-HO-TCYC1-PACT1-LexA-ER-B112-TCYC1-LEU2MX exo1::KanMX sgs1::hphMX rad53::DDC2-RAD53::URA3	This study
LSY5563-27C	MATa RAD5 hmlD hmrD leu2::P_lexO-HO-TCYC1-PACT1-LexA-ER-B112-TCYC1-LEU2MX rad53::DDC2-RAD53::URA3	This study
CBY88	MATa ade2-1 GalS-Ddc1-LacI-GFP::URA3 Gal-Ddc2-LacI-GFP::HIS3 Rad53-HA::LEU2 trp1::256xLacO::TRP1 ddc1::hisG	Bonilla et al. 2008
LSY5325-448A	MAT⍺ ade2::ade2-I leu2::ade2-n-LEU2MX lys2::GAL-ISceI GalS-Ddc1-GFP-LacI::URA3 Gal-Ddc2-GFP-LacI::HIS3 ddc1::hisG	This study
LSY5326-252D	MATa ade2::ade2-I leu2::ade2-n-LEU2MX lys2::GAL-ISceI Rad53-HA::LEU2 GalS-Ddc1-GFP-LacI::URA3 Gal-Ddc2-GFP-LacI::HIS3 ddc1::hisG exo1::KanMX sgs1::HphMX	This study
LSY5408	MAT⍺ ade2::ade2-I leu2::ade2-n-LEU2MX lys2::GAL-ISceI GalS-Ddc1-GFP-LacI::URA3 Gal-Ddc2-GFP-LacI::HIS3 ddc1::hisG trp1::256xLacO::TRP1	This study
LSY5409	MATa ade2::ade2-I leu2::ade2-n-LEU2MX lys2::GAL-ISceI Rad53-HA::LEU2 GalS-Ddc1-GFP-LacI::URA3 Gal-Ddc2-GFP-LacI::HIS3 ddc1::hisG trp1::256xLacO::TRP1 exo1::KanMX sgs1::HphMX	This study
LSY4950-2	MATa ade2::ade2-I Chr4::ade2-n-NatMX lys2::GAL-ISceI	This study
LSY4952-8D	MATa ade2::ade2-I Chr4::ade2-n-NatMX lys2::GAL-ISceI exo1::KanMX sgs1::HphMX	This study
LSY4965-1	MAT⍺ ade2::ade2-I Chr8::ade2-n-NatMX lys2::GAL-ISceI	This study
LSY4972-13C	MAT⍺ ade2::ade2-I Chr8::ade2-n-NatMX lys2::GAL-ISceI exo1::KanMX sgs1::HphMX	This study
LSY5028-8D	MATa ade2::ade2-I Chr16::ade2-n-NatMX lys2::GAL-ISceI	This study
LSY4974-92B	MATa ade2::ade2-I Chr16::ade2-n-NatMX lys2::GAL-ISceI exo1::KanMX sgs1::HphMX	This study
LSY5163-1	MAT⍺ ade2::ade2-I Chr15(19kb)::ade2-n-NatMX lys2::GAL-ISceI	This study
LSY5198-3B	MAT⍺ ade2::ade2-I Chr15(19kb)::ade2-n-NatMX lys2::GAL-ISceI exo1::KanMX sgs1::HphMX	This study
LSY5164-1	MAT⍺ ade2::ade2-I Chr15(54kb)::ade2-n-NatMX lys2::GAL-ISceI	This study
LSY5199-6A	MAT⍺ ade2::ade2-I Chr15(54kb)::ade2-n-NatMX lys2::GAL-ISceI exo1::KanMX sgs1::HphMX	This study
LSY5141-2	MAT⍺ ade2::ade2-I Chr15(100kb)::ade2-n-NatMX lys2::GAL-ISceI	This study
LSY5147-3C	MATa ade2::ade2-I Chr15(100kb)::ade2-n-NatMX lys2::GAL-ISceI exo1::KanMX sgs1::HphMX	This study
LSY5142-1	MAT⍺ ade2::ade2-I Chr15(250kb)::ade2-n-NatMX lys2::GAL-ISceI	This study
LSY5148-17A	MATa ade2::ade2-I Chr15(250kb)::ade2-n-NatMX lys2::GAL-ISceI exo1::KanMX sgs1::HphMX	This study
LSY5143-1	MAT⍺ ade2::ade2-I Chr15(448kb)::ade2-n-NatMX lys2::GAL-ISceI	This study
LSY5149-12A	MATa ade2::ade2-I Chr15(448kb)::ade2-n-NatMX lys2::GAL-ISceI exo1::KanMX sgs1::HphMX	This study
LSY5140-1	MAT⍺ ade2::ade2-I Chr15(478kb)::ade2-n-NatMX lys2::GAL-ISceI	This study
LSY5157-13D	MAT⍺ ade2::ade2-I Chr15(478kb)::ade2-n-NatMX lys2::GAL-ISceI exo1::KanMX sgs1::HphMX	This study
LSY5250	MATa ade2::ade2-I leu2::ade2-n-LEU2MX lys2::GAL-ISceI exo1::KanMX sgs1::HphMX +pRS423-RAD51	This study
LSY5251	MATa ade2::ade2-I leu2::ade2-n-LEU2MX lys2::GAL-ISceI exo1::KanMX sgs1::HphMX +pRS423	This study
LSY5258	MATa ade2::ade2-I leu2::ade2-n-LEU2MX lys2::GAL-ISceI +pRS423-RAD51	This study
LSY5259	MATa ade2::ade2-I leu2::ade2-n-LEU2MX lys2::GAL-ISceI +pRS423	This study
