# Supplementary material for: Long-range DNA end resection supports homologous recombination by checkpoint activation rather than extensive homology generation
Source: eLife. 2023 Jun 30;12:e84322. doi: 10.7554/eLife.84322 (PMC10400078; doi:10.7554/eLife.84322)
Supplement: Supplementary file 2. — Oligonucleotides used for recombination assays and generation of ectopic recombination strains. [file elife-84322-supp2.xlsx]

## Sheet: Sheet1
Table S2	Oligonucleotides
Name	Sequence	Description
MK193	5' TGAGATCGGAGGGCATTTATAG	ADE2 recombination assay (fwd)
MK197	5' ACGCCGTATCGTGATTAACG	ADE2 recombination assay (rev)
MK238	5' GATGTATGCCACTTTCTGGTG	ChrXV control (fwd)
MK239	5' GTTTCAGATAGTGCTCTGCCG	ChrXV control (rev)
MK255	5' CAGGTAGTTCTGGTCCATTG	TRP1 probe (fwd)
MK256	5' CACCATTTGTCTCCACACCT	TRP1 probe (rev)
MK148	5' ACCCAAAGTGTTCCTGTGGA	ade2-I-SceI cutting efficiency (fwd)
MK149	5' TCAAGACGAATGGAAAACCCA	ade2-I-SceI cutting efficiency (rev)
oRG46	5' TCAATGATTAAAATAGCATAGTCGGGT	MATa HO cutting efficiency (fwd)
oRG47	5' CGTCAACCACTCTACAAAACCA	MATa HO cutting efficiency (rev)
oRG54	5' GTTAAGGGCTGGAAGATCGG	ADH1 control (fwd)
oRG55	5' TTGTTGGAAAGAACCGTCGT	ADH1 control (rev)
oRG52	5' ACTTATCTTTATCTTATTCGCCTTCTTG	Resection at 640 bp (fwd)
oRG53	5' GAGAAGACTTGTGGCGAAGA	Resection at 640 bp (rev)
oRG796	5' CGTAAAGTCATAAGCACCCACTT	Resection at 1.3 kb (fwd)
oRG797	5' GAATTGGCTTTCATCATACGAGT	Resection at 1.3 kb (rev)
oRG800	5' AGCATTCGGTTCGGTTCAAA	Resection at 2.5 kb (fwd)
oRG801	5' CGAATGGGTATATGGGTCTGG	Resection at 2.5 kb (rev)
MK202	5' CTTACGTTCCAGGTATTTCGCACCCATTTT GAATTCTCCATCGGATCCGGGATCTTTTTAC	ade2-n-NatMX for Chr IV P1 (fwd)
MK203	5' CTACTGTTATACAAAAGGGTGAAAATTGAG ACCCAAATTCCGGCGTTAGTATCGAATCGAC	ade2-n-NatMX for Chr IV P1 (rev)
MK204	5' GTTTTTGTCAGGTTAATGCGTCTGTGTATT TCTCAGAACGCTTACGTTCCAGGTATTTCG	Extending Chr IV homology of MK202 (fwd)
MK205	5' CAATCACAAGCCAAATATTGGAGATTACAT GCAAGAATGCTACTGTTATACAAAAGGGTG	Extending Chr IV homology of MK203 (rev)
MJ4	5' AACAACAACAACAACAGCACAACAACAGC ACAACAACATCCGGATCCGGGATCTTTTTAC	ade2-n-NatMX for Chr VIII P1 (fwd)
MJ5	5' TAACGTAAGAGTATTCAGTATCAACGGCAA CAACAACAACAACAACAACAACAACAGCAC	Extending Chr VIII homology of MJ4 (fwd)
MJ6	5' TAAACACTTGCTGCCCGAAGGGGAAACC AAAAAAGGCGGGCGTTAGTATCGAATCGAC	ade2-n-NatMX for Chr VIII P1 (rev)
MJ7	5' CCCAAAGTGGAAATACCGTAATAGTACCAT TATCCTACAGTAAACACTTGCTGCCCGAAG	Extending Chr VIII homology of MJ6 (rev)
MJ10	5' ATAGAATCTCCCATAGAGTGAGTATGTTGT GATTAAAGAGCGGATCCGGGATCTTTTTAC	ade2-n-NatMX for Chr XVI P1 (fwd)
MJ11	5' CGCTTGCTAATTTATAATGCCATTTACTAA CCTAAGGAGAATAGAATCTCCCATAGAGTG	Extending Chr XVI homology of MJ10 (fwd)
MJ12	5' ACTTACTGCTGTCTCTTGACCGTTTTTGCT ATACTCATCCGGCGTTAGTATCGAATCGAC	ade2-n-NatMX for Chr XVI P1 (rev)
MJ13	5' GATTTCTGTTATAAGGCCTATTTGTTCTAG TTACGACGACACTTACTGCTGTCTCTTGAC	Extending Chr XVI homology of MJ12 (rev)
MJ20	5' TATAGTTTTCGGACCGAGAAGAAGCCACC ACATCCCACTACTCGCTCAATACGATGTGTG	Extending Chr XV-100 kb homology of MJ21 (rev)
MJ21	5' CTCGCTCAATACGATGTGTGGAGAATGCAT GGTCTCTACGGGCGTTAGTATCGAATCGAC	ade2-n-NatMX for Chr XV-100 kb P1 (rev)
MJ22	5' GTTACGCAAACAAAGGAAAGGCGGGAGTA CCACAGCAGTGCGGATCCGGGATCTTTTTAC	ade2-n-NatMX for Chr XV-100 kb P1 (fwd)
MJ23	5' ACAAAAAGCCCGAGCACGCACCATGTAAT TTCCGAGATCTGTTACGCAAACAAAGGAAAG	Extending Chr XV-100 kb homology of MJ22 (fwd)
MJ24	5' GTACCCTGAAAGCCAGCGCTACTAATTAA CCAGGTTGACCAGCCTTCACTCATTCGCG	Extending Chr XV-250 kb homology of MJ25 (rev)
MJ25	5' AGCCTTCACTCATTCGCGGCGACAGCAAA AGCGGAAGAAGGGCGTTAGTATCGAATCGAC	ade2-n-NatMX for Chr XV-250 kb P1 (rev)
MJ26	5' GGTGCTAATCATTTTTAACTTGTTCTTTTT CCTCCTAGAACGGATCCGGGATCTTTTTAC	ade2-n-NatMX for Chr XV-250 kb P1 (fwd)
MJ27	5' GCACAGCTGCCCAATGACAGATATAGGC AACGTTGTTGGTGCTAATCATTTTTAACTTGT	Extending Chr XV-250 kb homology of MJ26 (fwd)
MJ28	5' TTACGTAGGTTTTTTTTACACGATATTGT TTGTATTATCAGTATTCCCTTCAAGCTCC	Extending Chr XV-448 kb homology of MJ29 (rev)
MJ29	5' GTATTCCCTTCAAGCTCCCCTTTTTTTTAT CAATTAAGGTGGCGTTAGTATCGAATCGAC	ade2-n-NatMX for Chr XV-448 kb P1 (rev)
MJ30	5' AAGAAAAGTTATGATTTTGGTAATTTGAGT CAAATAGTCACGGATCCGGGATCTTTTTAC	ade2-n-NatMX for Chr XV-448 kb P1 (fwd)
MJ31	5' GAAACTATTATTTTAAAGCCTTCAATAATG GAATGCTGAAAAGAAAAGTTATGATTTTGG	Extending Chr XV-448 kb homology of MJ30 (fwd)
MJ48	5' GGAGGCTATTGATATACAAAATACTAAGA AATATAGGTTGCTGCAAGGAAGAAGATCAA	Extending Chr XV-478 kb homology of MJ49 (fwd)
MJ49	5' CTGCAAGGAAGAAGATCAAAAACCCTCTA AATTTCGCTTTCGGATCCGGGATCTTTTTAC	ade2-n-NatMX for Chr XV-478 kb P1 (fwd)
MJ50	5' CATCTACATTAGGATTTACTCTTTGTTTTT CAACTTCTGCGGCGTTAGTATCGAATCGAC	ade2-n-NatMX for Chr XV-478 kb P1 (rev)
MJ51	5' AGAAGTTGGGATCCTTAAGAGCATGTTTC TTTTTCCACGCATCTACATTAGGATTTACTC	Extending Chr XV-478 kb homology of MJ50 (rev)
MJ54	5' GTCGTAAAGTTGAAATGAATTGAAGTCA GAATTAAAATAGAAGGGGTATTGTTGCGG	Extending Chr XV-19 kb homology of MJ55 (rev)
MJ55	5' AAGGGGTATTGTTGCGGCTAAAGTAAAATA AAGAAAGGAGGGCGTTAGTATCGAATCGAC	ade2-n-NatMX for Chr XV-19 kb P1 (rev)
MJ56	5' TAATGCCAAGTCCTAAACTTATTATAATAT AGCCTCGAACCGGATCCGGGATCTTTTTAC	ade2-n-NatMX for Chr XV-19 kb P1 (fwd)
MJ57	5' GATAAAGGACAGTTTTAATTTTTATACTTT TGATCTGAAATAATGCCAAGTCCTAAACTT	Extending Chr XV-19 kb homology of MJ56 (fwd)
MJ58	5' CATAAAACAGAGAGGCGATATAGGAATGA ATATGTGCTATTTACGGAAGGGAAAAACACT	Extending Chr XV-54 kb homology of MJ59 (rev)
MJ59	5' TTACGGAAGGGAAAAACACTTATTGTTTTT CTGAAATGTGGGCGTTAGTATCGAATCGAC	ade2-n-NatMX for Chr XV-54 kb P1 (rev)
MJ60	5' TATCTGAAATTTGTCTACTGCATTCAGGC TTATATATATGCGGATCCGGGATCTTTTTAC	ade2-n-NatMX for Chr XV-54 kb P1 (fwd)
MJ61	5' ACATAGAAAGGGGTCCCAGAGAACGCTT CCTTTGTATGATATCTGAAATTTGTCTACTGC	Extending Chr XV-54 kb homology of MJ60 (fwd)
