# Supplementary figures and images for: Long-range DNA end resection supports homologous recombination by checkpoint activation rather than extensive homology generation
Source: eLife journal article supplement (doi:10.7554/elife.84322), 2023-06-30

19 kb donor

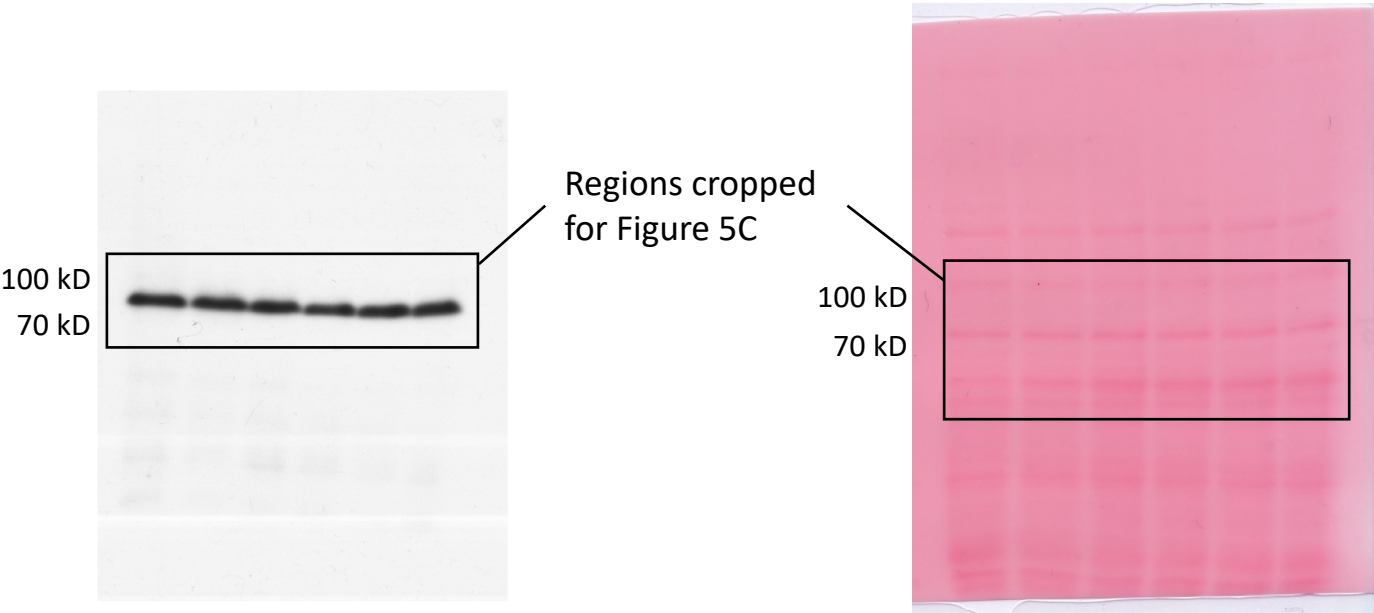

54 kb donor

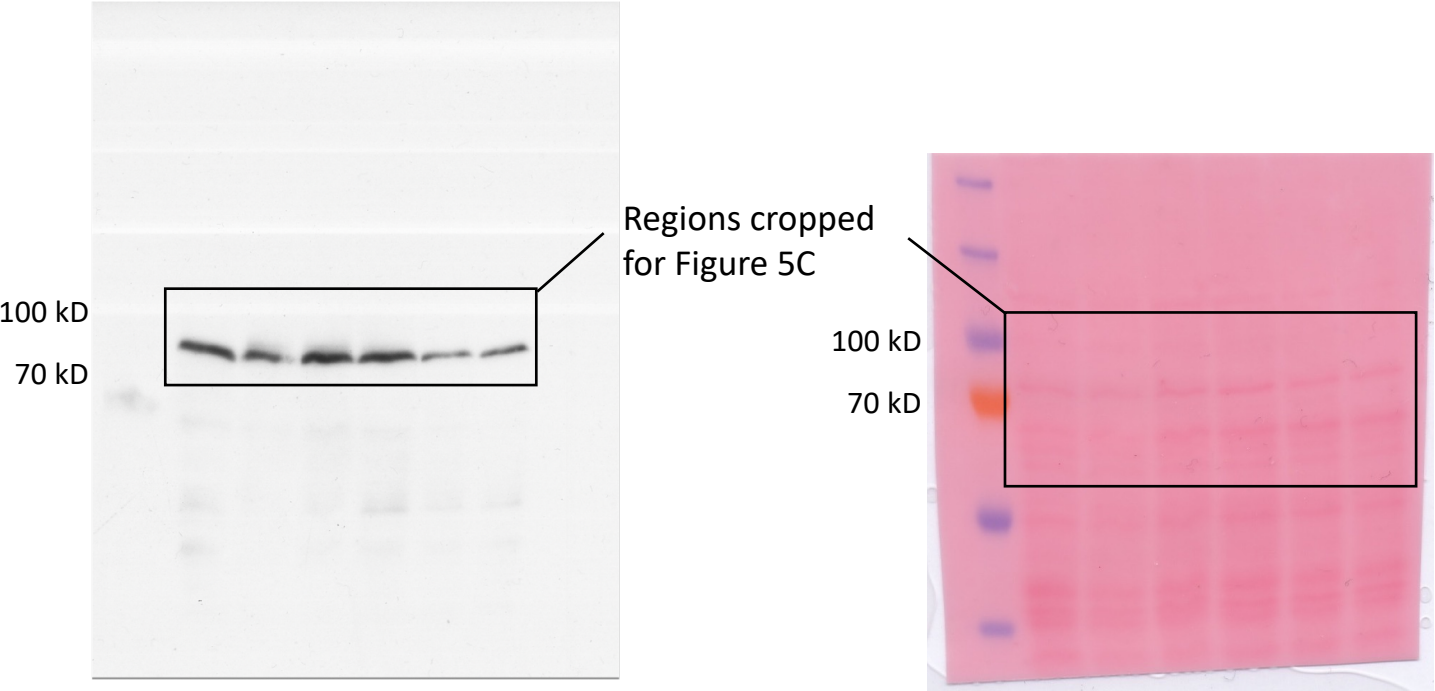

448 kb donor

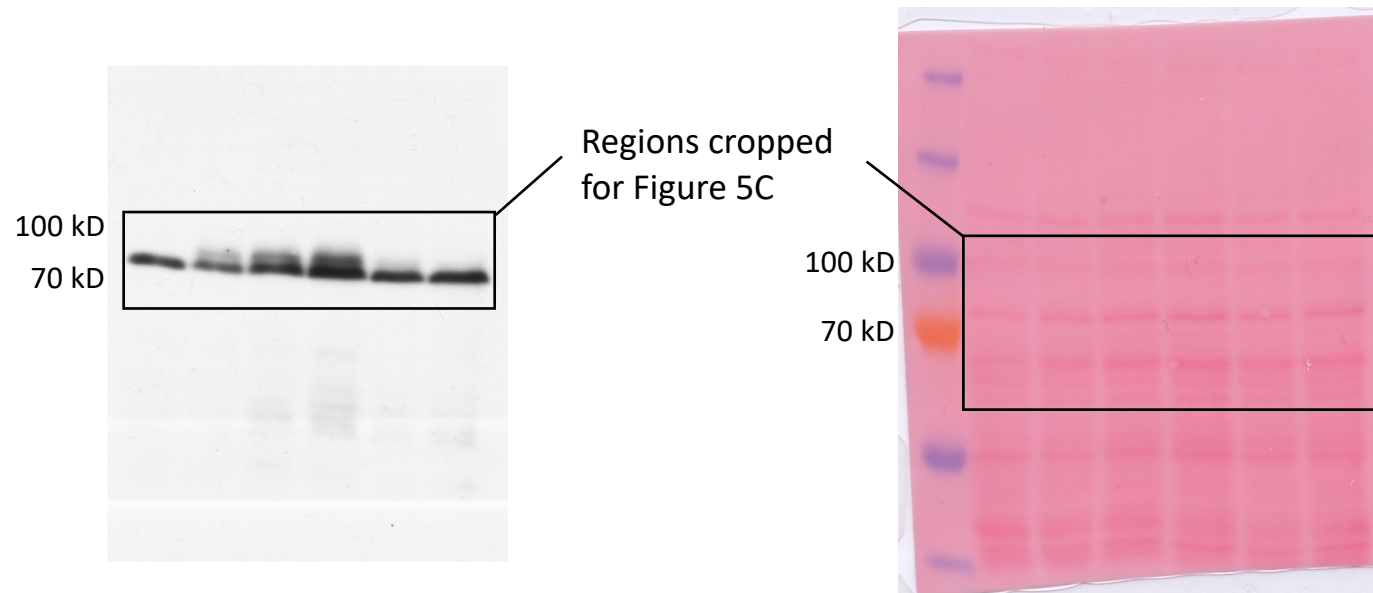

Supplement: supp [file elife-84322-supp-v1.zip]

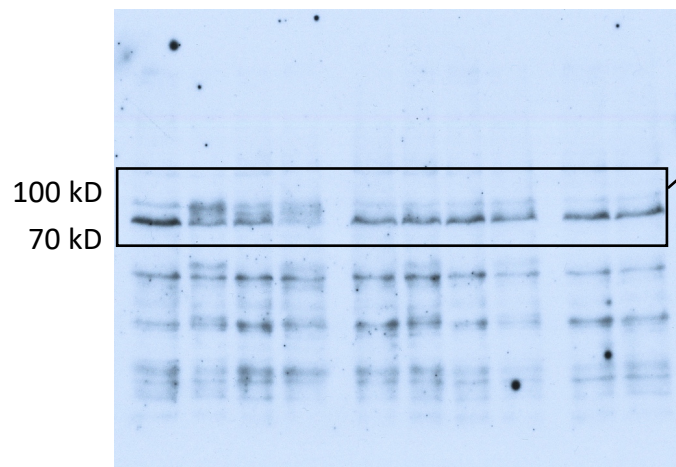

Regions cropped  
for Fig2\_S2

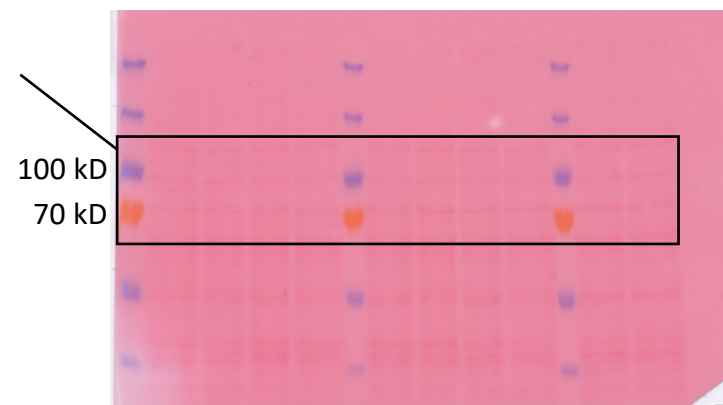

Supplement: supp [file elife-84322-supp-v1.zip]

WT

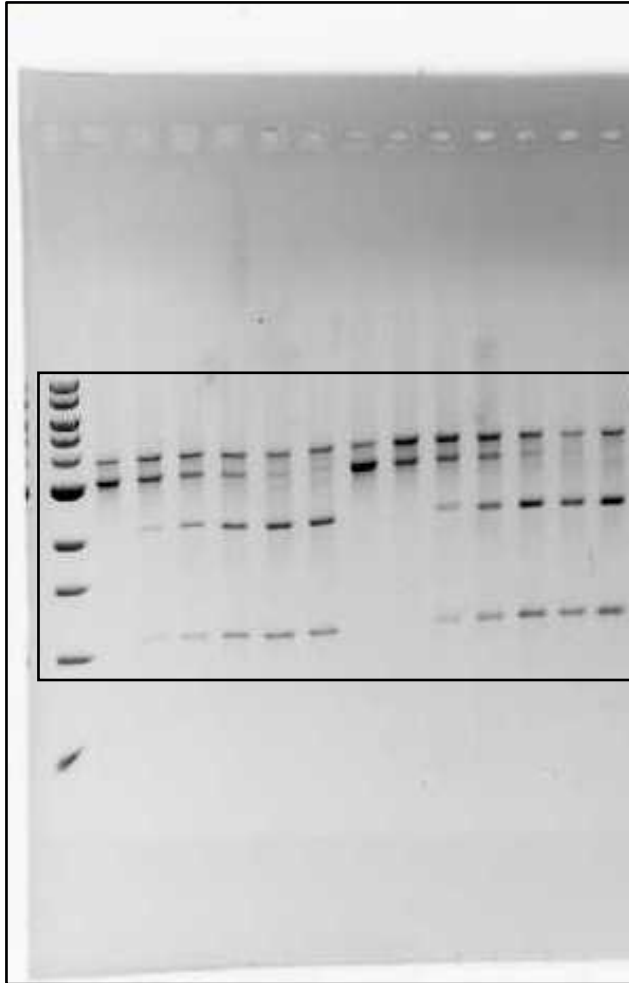

Regions cropped for  
Figure 2B  
See figure for labels

*exo1 $\Delta$  sgs1 $\Delta$*

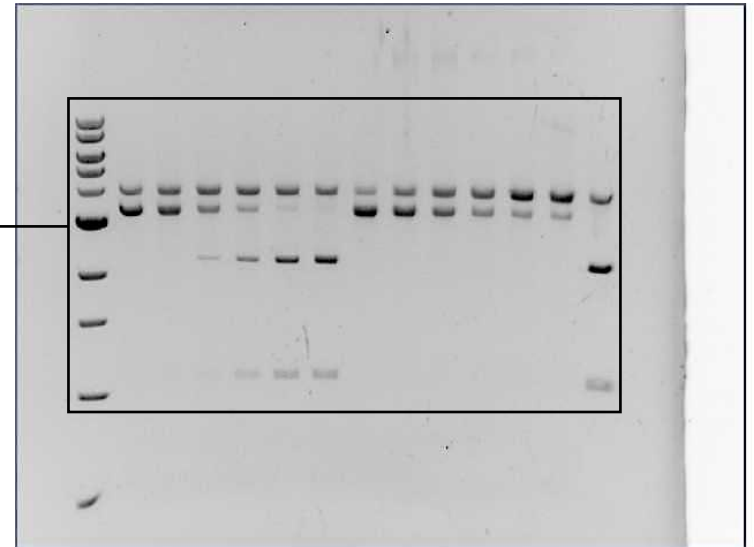

Supplement: supp [file elife-84322-supp-v1.zip]

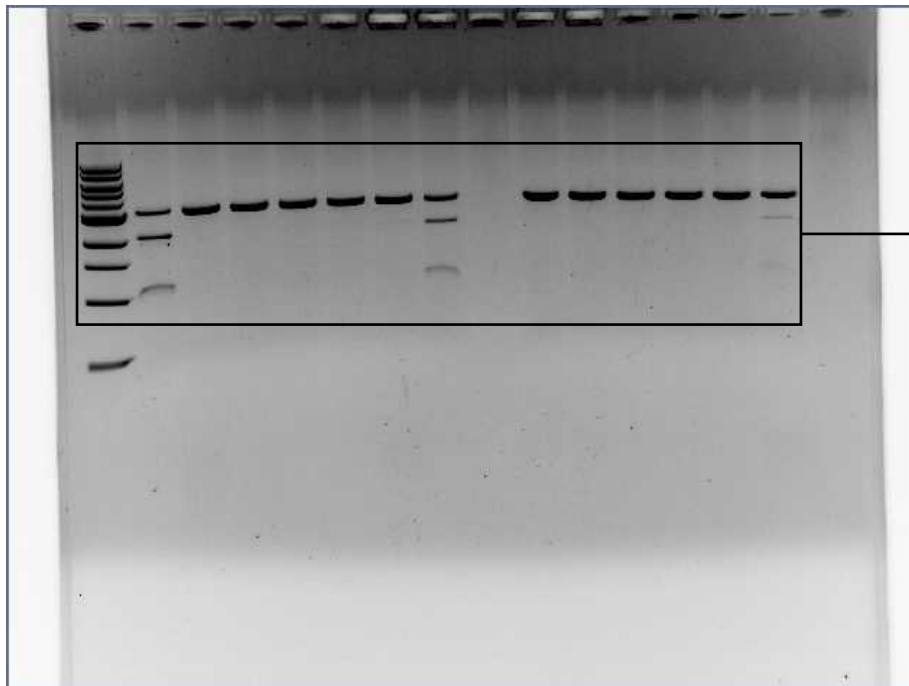

Region cropped for  
Supplementary Fig4\_S1C  
See figure for labels

Supplement: supp [file elife-84322-supp-v1.zip]

WT

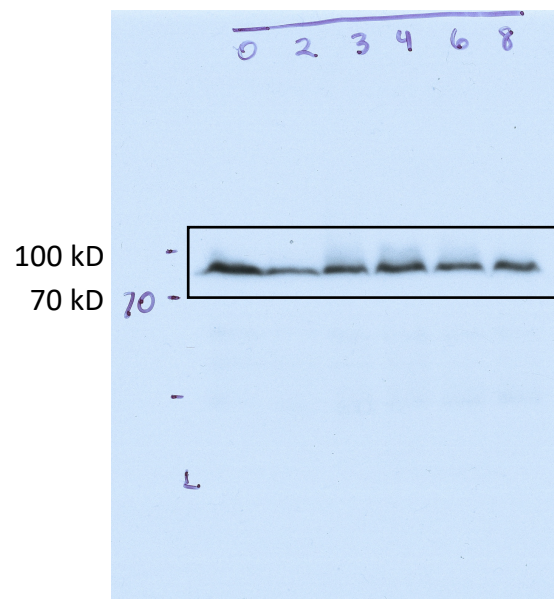

Regions cropped  
for Figure 2D

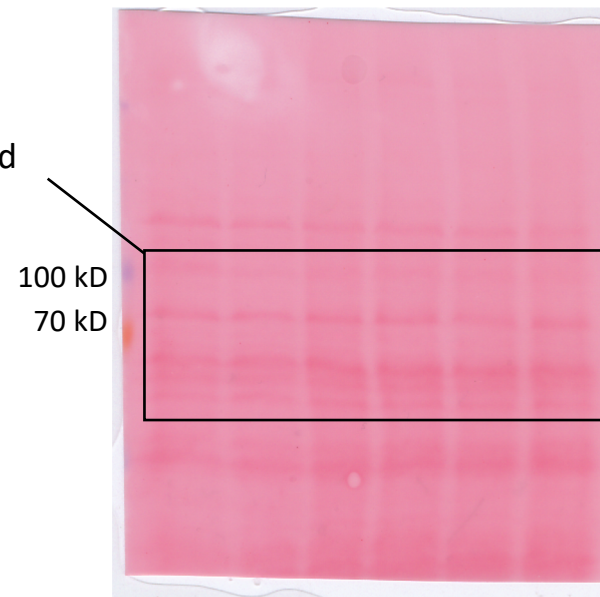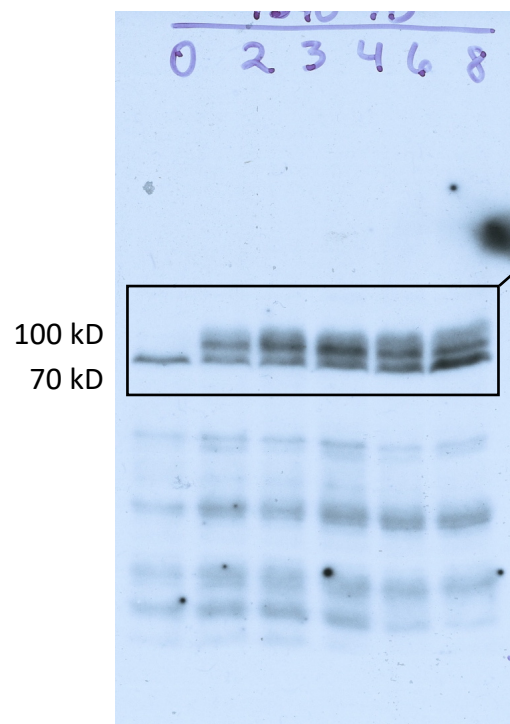

Regions cropped  
for Figure 2D

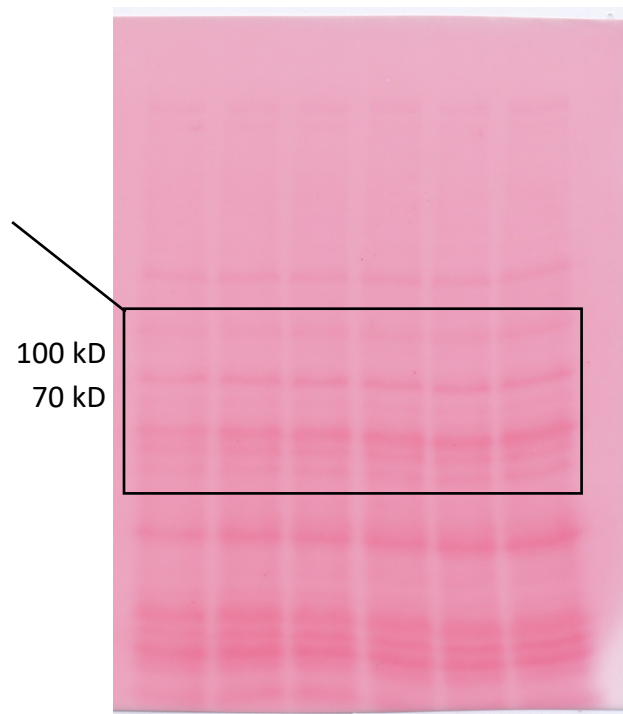

*exo1Δ sgs1Δ*

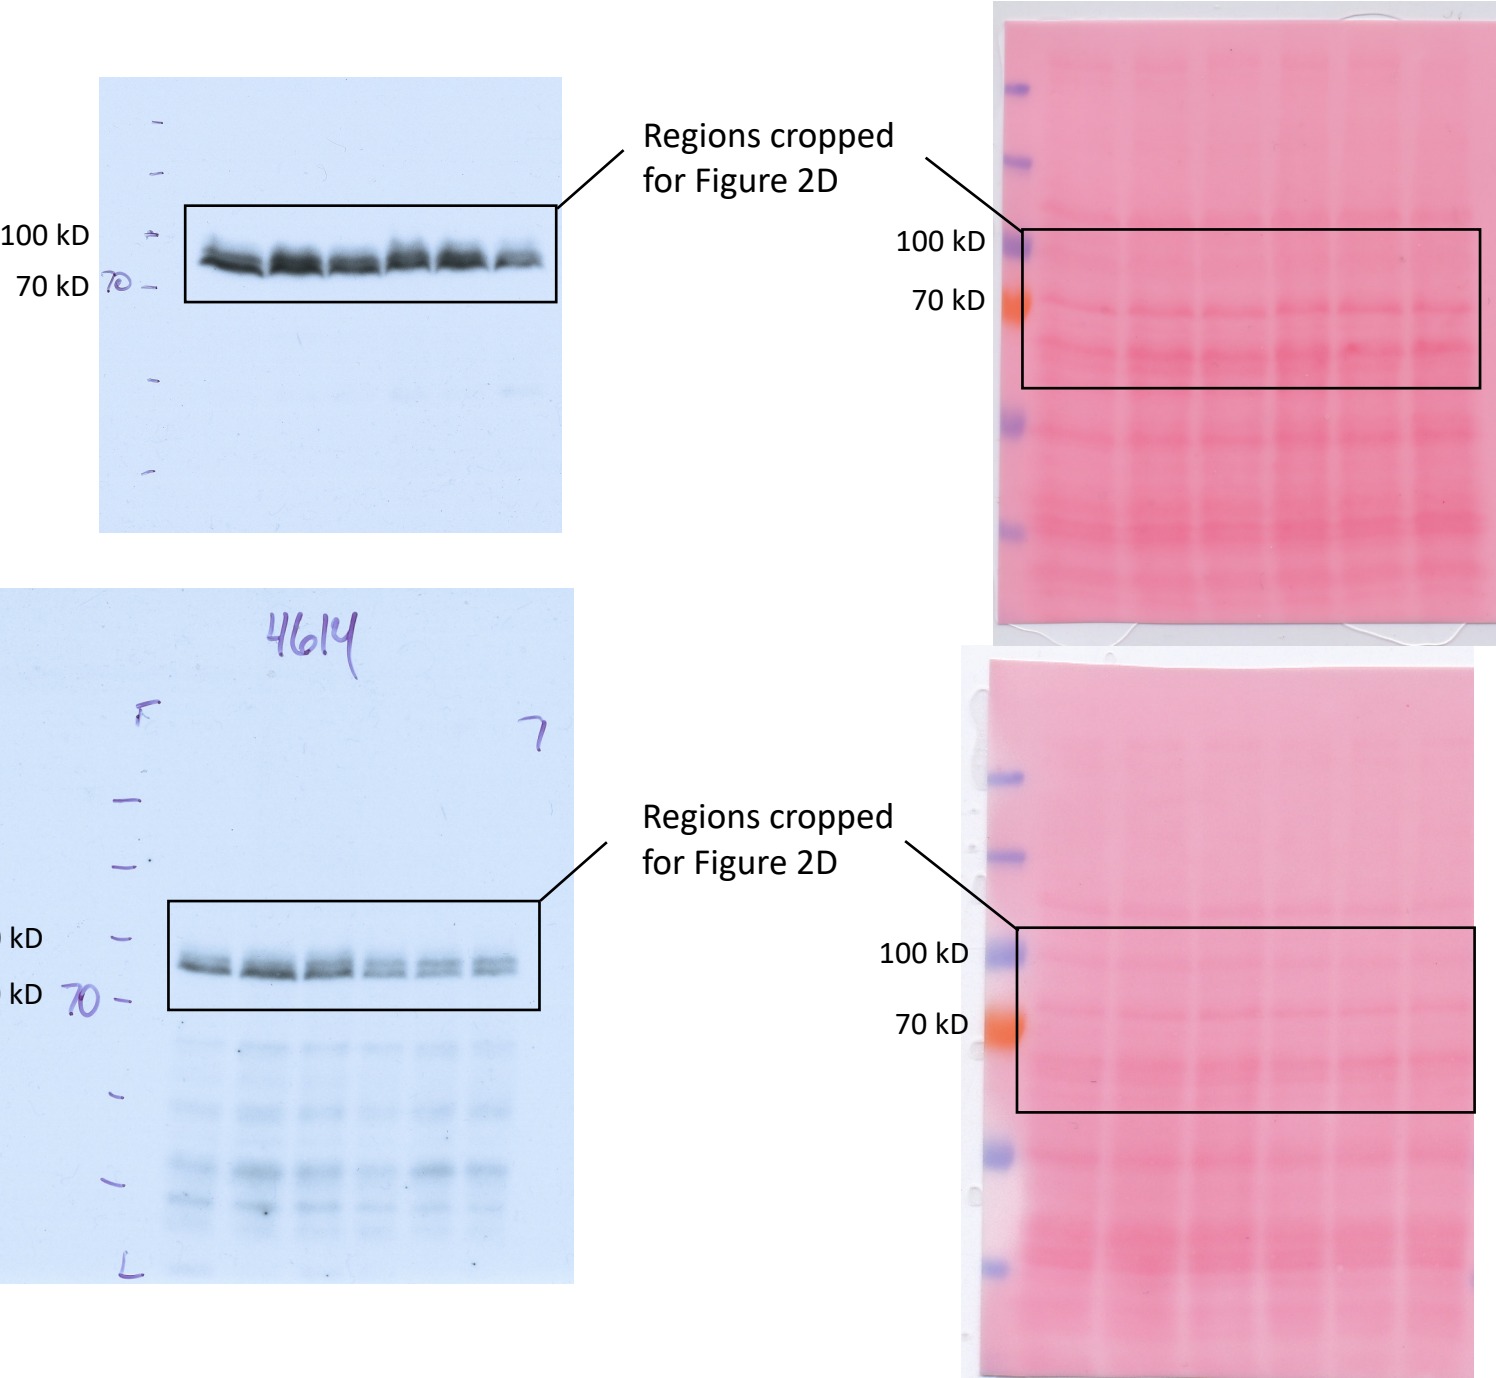

Supplement: supp [file elife-84322-supp-v1.zip]

- Checkpoint

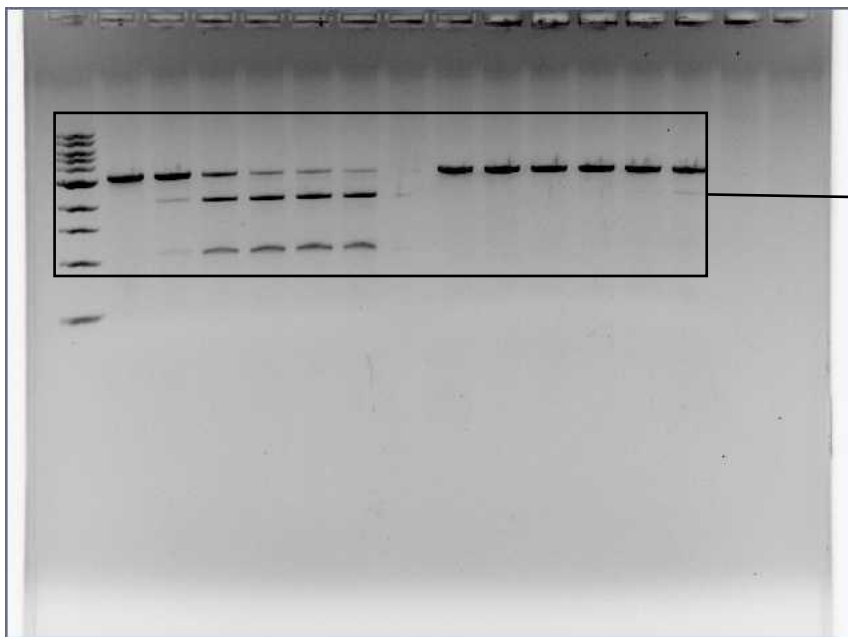

Regions cropped for  
Figure 4B  
See figure for labels

+ Checkpoint

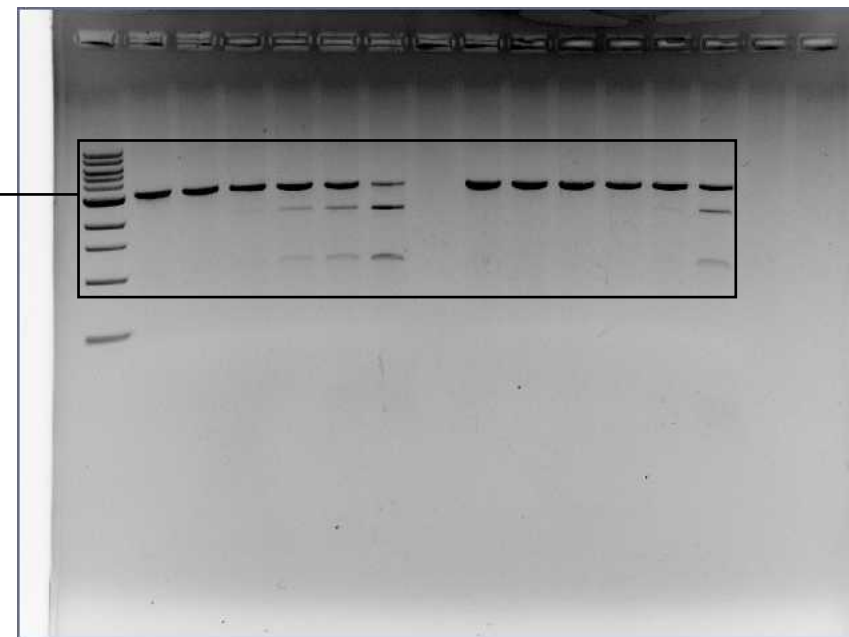

Supplement: supp [file elife-84322-supp-v1.zip]

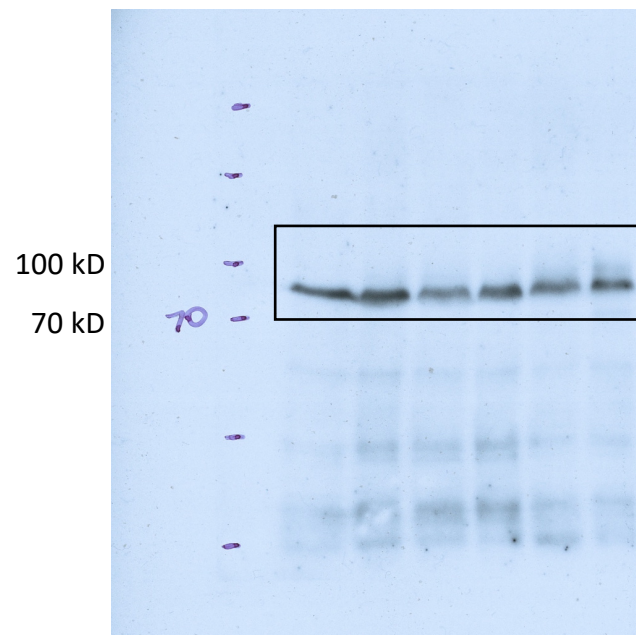

Regions cropped  
for Fig4\_S1D

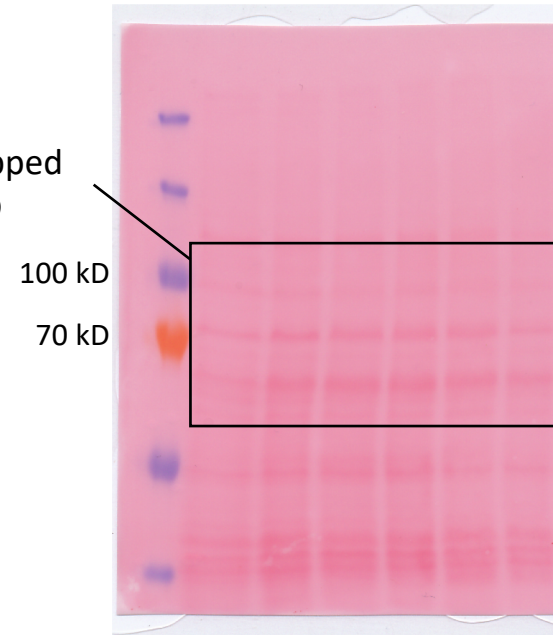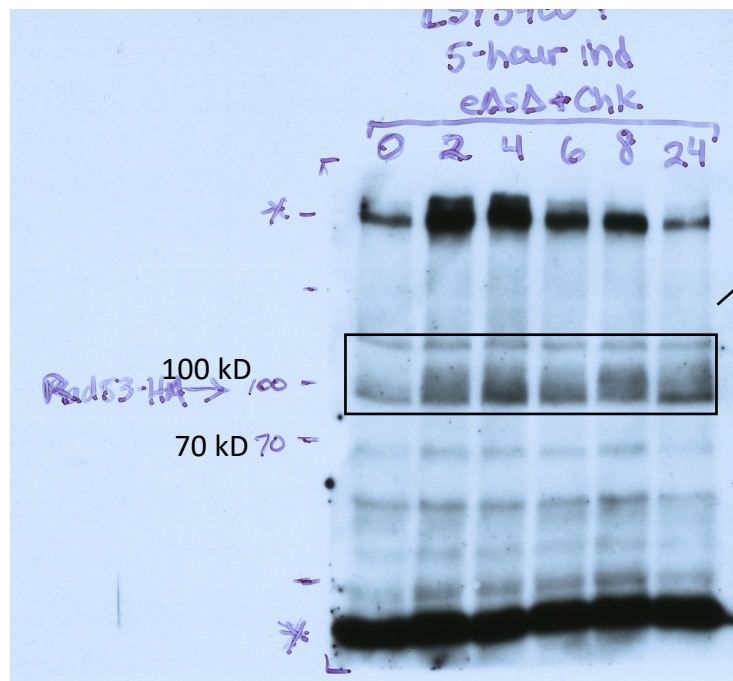

Regions cropped  
for Fig4\_S1D

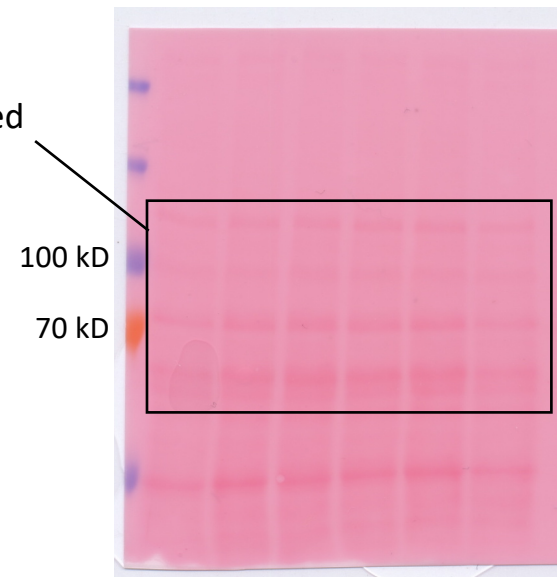

Supplement: supp [file elife-84322-supp-v1.zip]

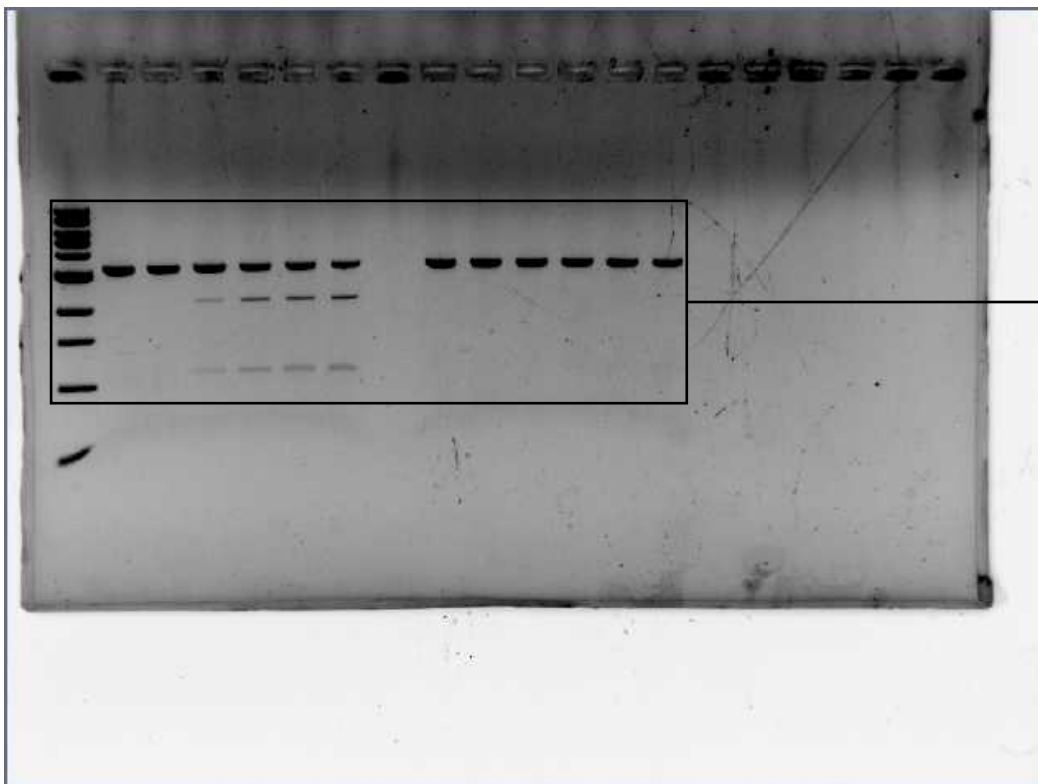

Region cropped for  
Figure 4D  
See figure for labels

Supplement: supp [file elife-84322-supp-v1.zip]
